1

**TITLE:**

2

**The roles of Amh in zebrafish gonad development and sex determination**

3

**AUTHORS:**

4

Yi-Lin Yan\*, Peter Batzel\*, Tom Titus\*, Jason Sydes\*, Thomas Desvignes\*, Ruth Bremiller\*,

5

Bruce Draper<sup>↑</sup>, and John [H.](#) Postlethwait <sup>1\*</sup>

6

**AFFILIATIONS:**

7

\* Institute of Neuroscience, University of Oregon, Eugene, Oregon USA 97403

8

<sup>↑</sup> Department of Molecular and Cellular Biology, University of California Davis, Davis, California

9

USA 95616

10

**REFERENCE NUMBERS:**

11

Reads are available at the Sequence Read Archive (<https://www.ncbi.nlm.nih.gov/sra>) under

12

accession number PRJNA512103. IACUC protocol #14-08R.

13

14

## RUNNING TITLE:

15 Amh and sex determination in zebrafish

16

## KEY WORDS:

17 germ cells, PGC, male fertility, female fertility, gonad development

18

## CORRESPONDING AUTHOR:

19 John H. Postlethwait, Institute of Neuroscience, 1254 University of Oregon, 1425 E. 13th  
20 Avenue, Eugene OR 97403, Phone: (541) 346-4538, email: [jpostle@uoregon.edu](mailto:jpostle@uoregon.edu).

21

## ABSTRACT

22 Fetal mammalian testes secrete Amh (Anti-Müllerian hormone), which inhibits female  
23 reproductive tract (Müllerian duct) development. Amh also derives from mature mammalian ovarian  
24 follicles, which marks oocyte reserve and characterizes PCOS (polycystic ovarian syndrome).  
25 Zebrafish (*Danio rerio*) lacks Müllerian ducts and the Amh receptor gene *amhr2* but, curiously,  
26 retains *amh*. To discover the roles of Amh in the absence of Müllerian ducts and the ancestral  
27 receptor gene, we made *amh* null alleles in zebrafish. Results showed that normal *amh* prevents  
28 female-biased sex ratios. Adult male *amh* mutants had enormous testes, half of which contained  
29 immature oocytes, demonstrating that Amh regulates male germ cell accumulation and inhibits  
30 oocyte development or survival. Mutant males formed sperm ducts and some produced a few  
31 offspring. Young female mutants laid a few fertile eggs, so they also had functional sex ducts.  
32 Older *amh* mutants accumulated non-vitellogenic follicles in exceedingly large but sterile ovaries,  
33 showing that Amh helps control ovarian follicle maturation and proliferation. RNA-seq data  
34 partitioned 21-day post-fertilization (dpf) juveniles into two groups that each contained mutant and  
35 wild type fish. Group21-1 up-regulated ovary genes compared to Group21-2, which were likely  
36 developing as males. By 35dpf, transcriptomes distinguished males from females and, within each  
37 sex, mutants from wild types. In adult mutants, ovaries greatly under-expressed granulosa and

38 theca genes and testes under-expressed Leydig cell genes. These results show that ancestral  
39 Amh functions included development of the gonadal soma in ovaries and testes and regulation of  
40 gamete proliferation and maturation. A major gap in our understanding is the identity of the gene  
41 encoding a zebrafish Amh receptor; we show here that the loss of *amhr2* is associated with the  
42 breakpoint of a chromosome rearrangement shared among cyprinid fishes.

43

44 **Article Summary**

45 Anti-Müllerian hormone (Amh) inhibits female reproductive duct development, signals oocyte  
46 reserve, and marks polycystic ovarian syndrome. Zebrafish lacks Müllerian ducts and the typical  
47 Amh receptor, questioning evolving roles of Amh. We made knockout mutations in zebrafish *amh*.  
48 Most mutants were female and the few males often had oocytes in their testes, showing that Amh  
49 promotes male development. Mutant reproductive ducts functioned, but testes were enormous and  
50 ovaries accumulated immature oocytes, showing that Amh regulates germ cell proliferation and  
51 maturation. Transcriptomics revealed that Amh controls development of steroid-producing gonad  
52 cells. Amh in zebrafish preserved ancestral roles despite losing Müllerian ducts and the Amh  
53 receptor.  
54

55

## INTRODUCTION

56        Developing mammalian embryos form the rudiments of both male and female sex ducts, the  
57        Wolffian and Müllerian ducts, respectively. Over 70 years ago, Alfred Jost conducted remarkable  
58        experiments to learn if gonads control sex duct development (JOST 1947). He removed  
59        undifferentiated gonads from rabbit fetuses and re-implanted them into the uterus of surrogate  
60        rabbit hosts. Gonadectomized kits lost male sex ducts but retained female sex ducts. He  
61        concluded that developing testes maintain male ducts (epididymis, seminal vesicles, and vas  
62        deferens) but destroy female sex duct anlagen (fallopian tubes and uterus). In contrast, developing  
63        ovaries neither maintain male ducts nor destroy female ducts. Subsequent experiments showed  
64        that one testis-derived substance (testosterone) maintains male sex duct rudiments and another  
65        (anti-Müllerian hormone, AMH, also called Müllerian Inhibiting Substance, MIS), inhibits female  
66        reproductive duct anlagen (ELGER 1966; JOSSO 1972).

67        Although AMH from testes represses female duct development, AMH from ovaries begins to  
68        appear in the third trimester of human fetal development from primary and preantral follicles  
69        (MUNSTERBERG AND LOVELL-BADGE 1991). Ovarian *AMH* expression peaks in juvenile women,  
70        declines with age, and disappears at menopause; thus, circulating AMH levels reflect a woman's  
71        ovarian follicle reserve (VISSER *et al.* 2006; ZEC *et al.* 2011). Investigations of *Amh* mutant mice  
72        showed that chromosomal XY males that lack *Amh* activity develop oviducts, uterus, and vagina in  
73        addition to male reproductive ducts (BEHRINGER *et al.* 1994). Testes in *Amh*-deficient XY mice  
74        attain normal size, but some show Leydig cell hyperplasia (BEHRINGER *et al.* 1994). Chromosomally  
75        female XX *Amh* mutant juvenile mice have more preantral and small antral follicles and older  
76        mutant females have fewer primordial follicles, preantral, and small antral follicles than wild-type  
77        siblings (BEHRINGER *et al.* 1994; DURLINGER *et al.* 1999), suggesting that without AMH, primordial  
78        follicles develop more rapidly than normal, which results in larger juvenile ovaries that lose follicles  
79        prematurely. This property led to the use of circulating AMH as a marker of polycystic ovarian

80 syndrome (PCOS), the most common problem for couples who visit fertility clinics (PIGNY *et al.*  
81 2003; DIAMANTI-KANDARAKIS 2008)].

82 We wondered about the evolution of AMH functions and their relationship to reproductive ducts.  
83 Jawless fish lack specialized gamete-transporting sex ducts; lamprey gonads release gametes  
84 directly into the body cavity where they are forced out during spawning through genital pores  
85 (APPLEGATE 1948; HARDISTY 1971). Cartilaginous fish evolved paired Müllerian ducts (or  
86 paramesonephric ducts) that condense from intermediate mesoderm parallel to Wolffian ducts  
87 (mesonephric ducts), and differentiate into the female reproductive tract, including the fallopian  
88 tubes, which collect oocytes released into the coelomic cavity (WOURMS 1977). Among bony fish,  
89 tetrapods and basally diverging ray-finned fish like spotted gar (FERRARA AND IRWIN 2001)  
90 maintained this ancestral state, but teleosts lost their Müllerian ducts; gonoducts in many teleosts  
91 develop from somatic cells posterior to the gonad, and gametes pass from the gonad directly into  
92 the ducts rather than into the body cavity (e.g (SUZUKI AND SHIBATA 2004; KOSSACK *et al.* 2019)).  
93 We therefore wondered how Amh functions evolved in a teleost given that its eponymous feature  
94 of Müllerian duct inhibition is no longer relevant in the absence of a Müllerian duct.

95 Despite the absence of Müllerian ducts, Amh performs a reproductive function in at least some  
96 teleosts because a Y-chromosome variant of *amh* (*amhY*) plays a role in sex determination in the  
97 Patagonian pejerrey (HATTORI *et al.* 2012) and a variant Amh receptor (*Amhr2*) acts in sex  
98 determination in several, but not all, species of pufferfish (KAMIYA *et al.* 2012; LEDA *et al.* 2018). In  
99 addition, *amhr2* mutants in medaka show excess germ cell proliferation, premature male meiosis,  
00 sex reversal in some chromosomally XY fish, and early stage follicular arrest in females (MORINAGA  
01 *et al.* 2007). We lack, however, full knowledge of the roles these genes play in normal fish  
02 development. The situation is even more confusing because zebrafish lacks an *amhr2* gene  
03 (ROCHA *et al.* 2016), the loss of which we show here to be associated with chromosomal  
04 rearrangements that have breakpoints at the expected site of the ancestral *amhr2* gene,

05 breakpoints that originated at the base of the cypriniform radiation because we show that this  
06 inversion breakpoint is shared by the common carp (*Cyprinus carpio*).

07 To help identify ancestral roles, we knocked out *amh* in the zebrafish *Danio rerio*. We studied  
08 gonad development, reproductive tract function, and transcriptomics to help understand the  
09 molecular genetic mechanisms of Amh action. Like mammals, zebrafish expresses *amh* in Sertoli  
10 cells in testes and in granulosa cells in ovaries (RODRIGUEZ-MARI *et al.* 2005; VON HOFSTEN *et al.*  
11 2005; WANG AND ORBAN 2007; CHEN *et al.* 2017; YIN *et al.* 2017). In adult zebrafish organ culture,  
12 Amh inhibited the production of Fsh-stimulated androgen, and also inhibited androgen-stimulated  
13 proliferation of spermatogonia (SKAAR *et al.* 2011), suggesting a role for Amh in testis function.

14 Results showed that zebrafish males and females that lack Amh function had enormous gonads  
15 due to increased production and/or accumulation of germ cells (LIN *et al.* 2017). Mutant males  
16 developed mature sperm able to fertilize eggs, but at lower rates than wild-type siblings. Young  
17 mutant females produced fertile eggs, but older females became sterile as their ovaries  
18 accumulated immature follicles that failed to deposit yolk. Reproductive ducts in both males and  
19 females were structurally and functionally normal, making unlikely the hypothesis that the inhibition  
20 of female sex duct development is a conserved feature of Amh across vertebrates. Juvenile *amh*  
21 mutant zebrafish developing as males retained oocytes longer than their wild-type siblings, which  
22 generally develop as hermaphrodites before transitioning to become males or females about 19 to  
23 30 days post fertilization (dpf) (TAKAHASHI 1977; RODRIGUEZ-MARI *et al.* 2005; WANG *et al.* 2007;  
24 ORBAN *et al.* 2009). This result suggests that Amh promotes oocyte apoptosis in transitioning  
25 juvenile zebrafish. Based on trunk transcriptomes, 21dpf transitional stage fish clustered into two  
26 groups, one of which expressed more ovary genes, but both groups contained both wild-type and  
27 mutant fish, showing that Amh was not playing a sex-specific role at this stage. Transcriptomes of  
28 35dpf juvenile trunks clustered animals into clearly male and female groups, and within each sex  
29 group, wild types separated from mutants, showing that at this stage, Amh action is important for

30 gonad development. Transcriptomic comparisons of wild-type and *amh* mutant ovaries and testes  
31 revealed an ancestral role of *Amh* in Leydig cell development, oocyte differentiation, and the  
32 regulation of germ cell proliferation. We conclude that *Amh* either was not important for  
33 reproductive duct development in the last common ancestor of zebrafish and humans or, more  
34 likely, that this role was lost in the zebrafish lineage along with the loss of Müllerian ducts. A  
35 shared role of *Amh*, however, was likely the inhibition of germ cell proliferation both in ovaries and  
36 in testes, and that in mammals, the ovary retained this role but the testis apparently lost it.  
37 Alternatively, the teleost lineage gained the male germ cell proliferation role of *Amh*.

## 38 MATERIALS AND METHODS

### 39 Animals.

40 CRISPR/Cas9 mutagenesis generated deletions in zebrafish *amh* (ENSDARG00000014357,  
41 <http://ensembl.org>) using sites identified by ZiFiT Targeter (<http://zifit.partners.org/ZiFiT/>).  
42 Mutagenesis targeted two regions in *amh* exon-3: GGGATGCTGATAACGAAGGA (Site 1) and  
43 GGAATGCTTTGGGAACGTGA (Site 2) using gRNAs synthesized from DNA oligomer templates:  
44 aattaatacgaactcactataGGGATGCTGATAACGAAGGAgtttttagagctagaaatagc and  
45 aattaatacgaactcactataGGAATGCTTTGGGAACGTGAgttttagagctagaaatagc (IDT, Coralville,  
46 IA). MEGAscript T7 Transcription Kit transcribed gRNA and mMACHINE mMESSAGE mMACHINE T3  
47 Transcription Kit (Thermo Fisher Scientific, Waltham, MA) synthesized *Cas9* mRNA. Approximately  
48 2 nl of a solution containing 100 ng/μl *Cas9* mRNA and 25 ng/μl of both *amh* gRNAs was co-  
49 microinjected into one-cell embryos of the AB strain. Genomic DNA from injected embryos at 24hpf  
50 (hour post-fertilization) provided template to amplify a 319-bp PCR fragment including both sites  
51 (primers: F-AGGGTGTGCATGCTACAGAAGGTAAA and R-TGCCATCTTTTGCACCATCATTTCCAGCCA).  
52 Wild-type alleles have an *HpyAV* recognition site at Site 1 and an *HpyCH4IV* recognition site at  
53 Site 2 that are disrupted in *amh* mutant alleles. Sanger sequencing (GENEWIZ, Inc. NJ) verified



54 mutations. We established stable lines for three non-complementing alleles: deletions of 5-, 10-, or  
55 26-nucleotides (Fig. 1C, D). In addition, we made TALEN-induced deletions in *amh* (Fig. 1E).  
56 TALENs targeted the first coding exons of *amh* and were assembled as previously described  
57 (DRANOW *et al.* 2016). TALEN RNAs were synthesized by in vitro transcription using the  
58 mMESAGE mMACHINE kit (Ambion). TALEN pairs were co-injected at the one-cell stage at 50-  
59 100 pg for each TALEN. Founders were identified by screening sperm DNA by high resolution melt  
60 (HRM) analysis (DAHLEM TJ *et al.* 2012), using Light Scanner Master Mix (BioFire Defense), a  
61 CFX-96 real-time PCR machine and Precision Melt Analysis software (BioRad). Primer sequences  
62 for the indicated amplicon used were as follows (wild-type amplicon size in parentheses): F-  
63 AGATTTGGGCTGATGCTGAT and R-GTGGGACGAATGACTGACCT (212 bp). After initial identification,  
64 subsequent genotyping of offspring was performed by PCR followed by visualization on a 2%  
65 agarose gel using the same primers. The mutant allele *amh(uc28)* was an 11 bp deletion of the  
66 bold-faced nucleotides (ACAGTGAGGCACGAAGAGCAGGACAACAACCCGAAGGTCAACCCGCTATC ,  
67 with TALEN sequences underlined.

## 68 **Histology and *in situ* hybridization**

69 *In situ* hybridization was performed as described (Rodriguez-Mari *et al.*, 2005) using the probes:  
70 *amh* (ENSDARG00000014357), a 375-bp *amh* fragment including part of exon-7 (primers: F-  
71 AGGCTCAGTACCGTTCAGTGTTC and R-CCAACATCTCCTACAAGACCAACG (RODRIGUEZ-MARI *et al.*  
72 2005)); *bmp15* (ENSDARG00000037491) (DRANOW *et al.* 2016); *cyp19a1a*  
73 (ENSDARG00000041348) (CHIANG *et al.* 2001a); *gata4* (ENSDARG00000098952) using a 763-bp  
74 fragment including exon-1 to exon-6 (primers F-AGCACCGGGCACCATCATTCTCCG and R-  
75 GAGCTGGAGGATCCGCTTGGAGGC); *gdf9* (ENSDARG00000003229) using a 979-bp fragment  
76 including most of the coding region (primers F-TGTTGAACCCGACGTGCCCC and R-  
77 TGGTGTGCATTGGCGACCCG); *gsdf* (ENSDARG00000075301) (YAN *et al.* 2017); *bmpr2a*  
78 (ENSDARG00000011941) using a 914-bp fragment containing a part of the last coding exon and

79 the 3'UTR (primers *bmpr2a* + 2,658 F-GAGAGGGAGGAGAGAACAATGAGAGT and *bmpr2a* - 3,572 R-  
80 AGGGTACGTATCCACAATAGGTTGGA); *bmpr2b* (ENSDARG00000020057) giving a 727bp fragment  
81 is in exons 12 and 13 (primers *bmpr2b* +2,978 F-GGAGTCTTCGTCGTCTCGATTGAAAT and *bmpr2b* -  
82 3,705 R-TCACCTCTCCGTCTAGTGTATCAGTG); *nr5a1a* (ENSDARG00000103176) using a 859-bp  
83 fragment including exon-2 to exon-6 (primers F-AAGTGTCCGGTTATCATTACGGCC and R-  
84 TGTCTGCAGATGTGATCCAGAAGC); and *vasa* (ENSDARG00000014373) (YOON *et al.* 1997).  
85 Histology used paraffin-embedded Bouin's-fixed tissue sectioned at 10  $\mu$ m and stained with  
86 hematoxylin and eosin (H&E) (RODRIGUEZ-MARI *et al.* 2005). GSI, the gonadosomatic index, was  
87 calculated as the weight of the gonad divide by the weight of the fish times 100.

## 88 **Transcriptomics**

89 Juvenile wild types *and amh*<sup>-26</sup> homozygous mutants at 21 and 35 dpf were euthanized in  
90 Tricaine followed by isolating the gonad-containing trunk from just posterior of the pectoral fin to  
91 just anterior to the anus. Adult wild-type *and amh*<sup>-26</sup> homozygous mutant gonads were dissected  
92 from 8mpf adult animals. Trunks or gonads from each fish were individually homogenized in 200ul  
93 Trizol. Total RNA was extracted following (AMORES *et al.* 2011), and enriched for mRNA using  
94 Dynabeads® Oligo(dt)<sup>25</sup> (ThermoFisher). We constructed indexed, strand-specific cDNA  
95 sequencing libraries (NEXTflex™ qRNA-seq kit, BIOO Scientific), quantified libraries by Qubit®  
96 fluorometer (Life Technologies), normalized libraries to 2.3nM, multiplexed and quality checked  
97 libraries (Kapa Library Quantification Kit, Kapa Biosystems), and sequenced them in one lane on  
98 an Illumina HiSeq 4000 (paired-end 100 base pairs (bp)).

## 99 **Bioinformatics**

00 The Dupligänger duplicate removal pipeline (SYDES *et al.* 2019) preprocessed RNA-seq reads,  
01 identified and removed BIOO inline UMIs from the 5'-end of each read, removed read-through  
02 adapters (cutadapt v1.15 (MARTIN 2011), command line options: -n 3 -O 1 -m 30 -a

03 AGATCGGAAGAGC -A AGATCGGAAGAGC --too-short-output --too-short-paired-output), and then  
04 removed low quality sections from both the 5'-ends and 3'-ends (Trimmomatic (v0.36) (BOLGER *et*  
05 *al.* 2014), command line options: LEADING:10 TRAILING:10 SLIDINGWINDOW:5:10 MINLEN:30).  
06 Dupligänger tracked the number of nucleotides removed from the 5'-end and removed reads  
07 shorter than 30nt. We aligned processed PE reads to the zebrafish genome (GRCz10, Ensembl  
08 version 91) in a splice-aware manner using GSNAP (WU *et al.* 2016) (v2017-06-20, command line  
09 options: --suboptimal-levels 0 --quiet-if-excessive --kmer 15 --max-mismatches 0.1 --use-splicing --  
10 split-output), retaining reads that aligned in a concordant and unique manner. Dupligänger then  
11 removed PCR duplicates from the sequence alignment file if both of the following criteria had  
12 already been observed in another read pair: a) the read pair shares 5' alignment starts for both R1  
13 and R2 after correcting for 5' trimming, and b) the read pair shares the same R1 UMI and R2 UMI.  
14 We passed de-duplicated sequence alignment files to HTSeq-count (ANDERS *et al.* 2015)  
15 (command line options: --mode intersection-strict --type exon --stranded reverse) to obtain per-  
16 gene counts for protein-coding genes. DESeq2 provided statistical analysis of fold changes (LOVE  
17 *et al.* 2015). Analysis of conserved syntenies used the Synteny Database and Genomicus  
18 (CATCHEN *et al.* 2009; NGUYEN *et al.* 2018).

## 19 **Data availability statement**

20 RNA-seq reads are available at the Sequence Read Archive (<https://www.ncbi.nlm.nih.gov/sra>)  
21 under accession number PRJNA512103. Supplemental TableS1 (TableS1 Transcriptomics amh  
22 Juvenile trunks 21&35dpf.xls) and Supplemental Table S2 (TableS2 Transcriptomics amh Adult  
23 gonads.xls) list differentially expressed genes for juvenile trunks or adult gonads for *amh* mutants  
24 and wild-type siblings, respectively. Work was performed under the University of Oregon IACUC  
25 protocol #14-08R. Mutant strains are available on request.

## 26 **RESULTS**

## 27 **Molecular genetics of induced *amh* mutations**

28 To identify the roles of Amh in gonad development, we induced frame-shift premature stop  
29 codon alleles in zebrafish *amh* (ENSDARG00000014357) using CRISPR/Cas9 and TALEN  
30 mutagenesis. CRISPR guide RNAs targeted two sites in exon-3 located 16 nucleotides (nt) apart  
31 (Fig. 1A, red). These sites should be translated into the protein's Amh-domain, upstream of the  
32 cleavage site that liberates the TGF-beta domain that encodes the mature functional Amh protein.  
33 To assay CRISPR efficacy, we injected gRNAs and Cas9 RNA into 1-cell AB strain embryos, and  
34 at 24hpf (hours post fertilization), extracted DNA, amplified the target (primer locations green in  
35 Fig. 1A), and digested fragments with *HpyCH4IV*, which cleaves the wild-type but not a mutated  
36 site. Three of the four embryos tested had substantially reduced restriction enzyme cleavage (Fig.  
37 1B), verifying reagent utility. We raised injected embryos and isolated three mutant lines. Sanger  
38 sequencing (Fig. 1C) revealed deletions of 5, 10, and 26 nt (Fig. 1D, designated below as  
39 CRISPR-induced alleles *amh*<sup>-5</sup>, *amh*<sup>-10</sup>, and *amh*<sup>-26</sup>) and a deletion of 11 nt as a TALEN-induced  
40 *amh(uc28)* allele. These frame-shift mutations should result in truncated proteins lacking the  
41 mature TGF-beta domain due to premature stop codons (Fig. 1E).

42

## 43 **Amh facilitates development of a male phenotype**

44 To learn if *amh* plays a role in zebrafish sex determination as in some other fish (HATTORI *et al.*  
45 2012; KAMIYA *et al.* 2012; LI *et al.* 2015), we investigated sex ratios in *amh* mutant lines. The sex  
46 ratio of wild-type siblings was unbiased (48.4% males, 41 males and 43 females), but homozygous  
47 mutants had an average of only 17.8% males (12 males and 54 females,  $p < 0.05$ , Wilcoxon Rank  
48 Sum Test), about a third as many as expected, similar to prior results (LIN *et al.* 2017). We  
49 conclude that wild-type *amh* functions to facilitate the development of males but is not essential for  
50 AB strain zebrafish to develop a male phenotype.

## 51 **Amh regulates the production of functional gametes**

52 To test female fertility, we mated individual *amh* mutant females (-26 allele) to AB wild-type  
53 males and to test male fertility, we mated individual *amh* mutant males (-26 allele) to AB wild-type  
54 females. For both tests, we counted the number of females that laid eggs, the number of eggs per  
55 clutch, and the number of embryos that developed up to 72hpf. Results showed that homozygous  
56 *amh* mutant females at 4.5 months post fertilization (mpf) laid about half as many eggs as wild  
57 types ( $87\pm 57$  eggs/cross vs.  $169\pm 100$  eggs/cross), but most eggs from mutant females supported  
58 normal embryonic development (744/961 eggs, Fig. 2A). Homozygous *amh* mutant females at  
59 11mpf failed to lay any eggs at all (Fig. 2B). These results show that although young *amh* mutant  
60 females laid fewer eggs than normal, they nevertheless did lay eggs that developed; we conclude  
61 that *amh* mutant females developed functional reproductive ducts and results suggest that Amh is  
62 necessary for continued fertility as zebrafish age.

63 Tests of *amh* mutant male fertility showed that at 4.5mpf, crosses of single *amh*<sup>-26</sup> homozygous  
64 mutant males by three wild-type females resulted in the laying of only about 27% as many eggs as  
65 did wild-type sibling males ( $45\pm 36$  eggs/cross vs.  $169\pm 100$  eggs/cross, respectively), suggesting  
66 that normal Amh activity improves male mating behaviors. Only about 11% of eggs ( $5\pm 4$  of  $45\pm 36$ )  
67 laid by wild-type females mated to mutant males initiated development (Fig. 2A), showing that Amh  
68 is required for optimal sperm production and/or function. Results for homozygous *amh*<sup>-26</sup> mutant  
69 males at 11mpf showed continuing severe effects on male fertility (Fig. 2B). These results indicate  
70 that young mutant males make and release mature functional sperm, and thus that their  
71 reproductive ducts can transport sperm, at least initially. We conclude that *amh* function is not  
72 required for normal male sex duct development but is necessary for normal rates of functional  
73 sperm production. Combined with results from mutant females, we conclude that Amh is not  
74 required to construct functional reproductive ducts or to initiate fertility in either sex but is  
75 necessary to maintain fertility in both sexes.

## 76 **Amh promotes juvenile gonad development**

77 To understand *amh* mutant gonadal phenotypes, we studied histological sections at several  
78 developmental stages. For 21dpf late larval zebrafish, all eight wild-types examined had gonads  
79 with stage I oocytes (SELMAN *et al.* 1993; MAACK 2003) as expected for zebrafish juvenile  
80 hermaphrodites (TAKAHASHI 1977; RODRIGUEZ-MARI *et al.* 2005; WANG AND ORBAN 2007;  
81 RODRIGUEZ-MARI *et al.* 2010). Fig. 3A and B show two of the eight individuals. Six of eight 21dpf  
82 *amh*<sup>-26</sup> mutants were similar to wild types with stage I oocytes (Fig. 3C), but two lacked stage I  
83 oocytes and contained only undifferentiated germ cells (Fig. 3D). We conclude that most *amh*  
84 mutants develop histologically normal gonads at 21dpf, although some have gonads with delayed  
85 development.

86 For 35dpf juveniles, four of the eight wild types examined had stage I-II oocytes (Fig. 3E) and  
87 four had developing spermatocytes and spermatozoa (Fig. 3F). Among the eight *amh* mutants  
88 examined, seven had ovaries with morphologies similar to those in wild types (Fig. 3G) and only  
89 one fish had gonads that lacked oocytes and possessed developing spermatogonia organized in  
90 cysts (Fig. 3H) (MAACK 2003). We conclude that most of the 35dpf mutant juveniles we examined  
91 were embarking on a female trajectory, and that the only 35dpf *amh* mutant male that we  
92 sectioned had gonads that were developmentally delayed with respect to those in wild-type  
93 siblings.

## 94 **In females, Amh inhibits germ cell proliferation and differentiation**

95 To learn the roles of Amh in adults, we investigated gonad morphology in *amh* mutants over  
96 time. In adult females at 8mpf, ovaries in wild-type siblings contained oocytes of all stages (Fig. 4A,  
97 E, I). In contrast, *amh*<sup>-26</sup> mutant females had enlarged ovaries that distended the individual's  
98 abdomen (Fig. 4B, F, J). Averaging results from females homozygous for the *amh*<sup>-10</sup> and *amh*<sup>-26</sup>  
99 alleles, the gonadal-somatic index (GSI, (gonad weight / body weight)\*100) of *amh* mutants was

00 about 2.6-fold larger than their respective wild-type siblings, confirming prior results in zebrafish  
01 and mouse (DURLINGER *et al.* 1999; LIN *et al.* 2017). Adult ovaries in 8mpf *amh*<sup>-26</sup> zebrafish mutants  
02 lacked oocytes that had matured beyond stage III (Fig. 4F, J). Young (4.5mpf) *amh*<sup>-26</sup> mutant  
03 ovaries had 2.7-times as many stage I and II oocytes as found in wild-type ovaries (Fig. 4W), and  
04 by 8mpf and 18mpf, the relative proportion of immature oocytes increased to 9- and 35-fold that in  
05 wild-type siblings, respectively (Fig. 4W). We conclude that Amh activity inhibits oogonia  
06 proliferation or maturation. Although young *amh*<sup>-26</sup> mutants had formed stage IV oocytes in the  
07 central gonad (average of 23 stage IV oocytes in mutants and 32 in wild types), 8mpf *amh*<sup>-26</sup>  
08 mutant females had few stage IV oocytes in the central gonad (average of 5 oocytes in mutants  
09 and 20 in wild types) and 18mpf *amh*<sup>-26</sup> mutant females had an average of only two stage IV  
10 oocytes vs. 17 in wild types (Fig. 4W). Homozygotes for the *amh*<sup>-5</sup>, *amh*<sup>-10</sup>, and *amh*<sup>uc28</sup> alleles  
11 displayed similar phenotypes (Supplemental Fig. S3). We conclude that in aging female zebrafish,  
12 Amh activity is required to advance ovarian follicles from stage III to more mature stages.

13

#### 14 **In males, Amh inhibits germ cell proliferation and oocyte development or survival**

15 Males homozygous for each of the four *amh* mutant alleles displayed several phenotypic  
16 differences from wild-type siblings at 8mpf. First, *amh* mutant males had much larger abdomens  
17 than wild-type siblings (Fig. 4C, D) due to greatly enlarged testes (Fig. 4G, H, K, L), confirming  
18 prior results (LIN *et al.* 2017). The overgrowth of *amh* mutant male gonads (about 33.7 times  
19 heavier than wild-type sibling gonads (an average of 0.207±0.103 g (SD) for mutant testes (n=10)  
20 vs. 0.006±0.003 g for wild-type testes (n=13)) was even larger than that of mutant female gonads  
21 (2.2 fold, an average of 0.171±0.078 g for mutant ovaries (n=10) vs. 0.078±0.027 g for wild-type  
22 ovaries (n=10)) (see Fig. 4V). We conclude that *amh* activity is required to inhibit gonad growth  
23 both in adult males and in adult females. Adult *amh* mutant male gonads contained all stages of  
24 sperm development, including mature spermatozoa (Fig. 4L, P, T). Second, the proportion of later

25 stage male gametocytes in *amh* mutant testes appeared to be greatly reduced compared to wild  
26 types and the proportion of immature stages seemed much higher in mutant males than wild type  
27 males (Fig. 4L vs. Fig. 4K). Third, testis tubules were smaller in size but greater in number in *amh*  
28 mutants compared to wild types (Fig. 4 G, H, K, L, M-T). In cross sections, lobules in mutant testes  
29 were only 19.3% as large as lobules in wild-type testes ( $638 \pm 272$  vs.  $3,313 \pm 611 \mu\text{m}^2$ ). Fourth,  
30 and most remarkable, more than half of the 8mpf *amh*<sup>-26</sup> male mutant gonads examined (4/7 fish)  
31 contained early stage oocytes, but none of the seven 8mpf wild-type male siblings did (Fig. 4M-T).  
32 The finding of ovo-testes in mature adult *amh* mutants shows that normal *amh* activity helps to  
33 masculinize zebrafish gonad development by inhibiting the production or survival of young oocytes.  
34 We conclude that in zebrafish, normal Amh activity is required to regulate the proliferation of  
35 spermatogonia, to control the number and size of testis tubules, to govern the rate of maturation of  
36 spermatogonia to spermatozoa, and to ensure that immature oocytes disappear from male gonads  
37 during the juvenile hermaphrodite stage or to block the formation of oocytes in later development.

38

### 39 **Amh and Gsdf appear to act in the same developmental pathway**

40 Gsdf, like Amh, is essential to prevent the accumulation of young oocytes as zebrafish females  
41 age (YAN *et al.* 2017). If these two genes act in the same pathway, then double mutant ovaries  
42 should have about the same phenotype as each single mutant. Alternatively, if the genes act in  
43 parallel pathways, then double mutants should have more severe phenotypes than either single  
44 mutant. Analysis of *amh;gsdf* double mutants revealed female gonad phenotypes that were about  
45 the same as in each of the two single mutants: all three genotypes accumulated an enormous  
46 number of small oocytes with few stage III oocytes at 8-12mpf (Supplemental Figure S1 and data  
47 not shown). Males homozygous mutant for either *amh* or *gsdf* had enlarged testes compared to  
48 wild types; *amh* mutant males had larger testes even than *gsdf* mutant males; and *amh* mutant  
49 males became sterile as they aged while *gsdf* mutant males maintained fertility. Double mutant



50 testes were similar to *amh* mutants, and not more severe (Supplemental Figure S1), consistent  
51 with the explanation that in males as in females, *amh* and *gsdf* act in the same pathway.  
52 Furthermore, *amh* expression was nearly twice as high in *gsdf* mutant testes as in wild type testes  
53 (YAN *et al.* 2017), suggesting that Gsdf controls *amh*. Reciprocally, *gsdf* expression was 3.4-fold  
54 higher in *amh* mutant adult testes compared to wild-type testes in our RNA-seq results (see Suppl  
55 Table 2), consistent with the result from *in situ* hybridization (Fig. 5H and 5H'), suggesting that Amh  
56 controls *gsdf*. Together the mutant phenotypes and expression data show that the regulation of  
57 these two TGF $\beta$  family genes are interdependent.

58

### 59 **Amh activity is required for normal expression of key gonad development genes**

60 To understand in more detail the role of Amh in zebrafish gonad development, we studied the  
61 expression of several key regulatory and marker genes in adult wild types and *amh* mutants by *in*  
62 *situ* hybridization.

63 Wild-type adult ovaries at 8mpf expressed *amh* mainly in granulosa cells surrounding stage II  
64 oocytes (Fig. 5A, see also (RODRIGUEZ-MARI *et al.* 2005; VON HOFSTEN *et al.* 2005)). In contrast,  
65 *amh*<sup>-26</sup> mutant ovaries at 8mpf showed little *amh* expression in somatic cells surrounding oocytes,  
66 due either to nonsense-mediated decay or to the failure of *amh*-expressing cells to form in *amh*  
67 mutants (Fig. 5A'). Wild-type males at 8mpf displayed a well-organized pattern of *amh* expression  
68 in Sertoli cells surrounding testis tubules (Fig. 5B, see also (RODRIGUEZ-MARI *et al.* 2005; VON  
69 HOFSTEN *et al.* 2005)). Presumptive Sertoli cells also expressed *amh* in 8mpf *amh* mutant males,  
70 demonstrating transcript stability, but *amh*-expressing cells were less organized; testis tubules  
71 appeared to be smaller; and *amh*-expressing cells did not completely surround most testis tubules  
72 (Fig. 5B, B'). Homozygous *amh*<sup>-5</sup> and *amh*<sup>-10</sup> mutants showed similar expression patterns (data not

73 shown). We conclude that in adult male zebrafish, *amh* is required for the organization of Sertoli  
74 cells in testis tubules.

75 Bmp15 is an extracellular signaling protein that 8mpf wild-type adult zebrafish express mainly in  
76 oocytes in early stage ovarian follicles, and in maturing oocytes in later stage wild-type follicles  
77 (Fig. 5C and (CLELLAND *et al.* 2006; DRANOW *et al.* 2016)). Adult *amh* mutant ovaries appeared to  
78 express *bmp15* stronger than wild-type ovaries did (Fig. 5C, C') due to the accumulation of  
79 younger stages that express high levels of *bmp15*. Neither wild-type nor mutant testes showed  
80 significant *bmp15* expression (Fig. 5D, D'). We conclude that Amh function promotes the  
81 maturation of ovarian follicles in mature adult ovaries.

82 Gdf9, like Bmp15, is a TGF-beta-family member that marks oocytes (LIU AND GE 2007; DRANOW  
83 *et al.* 2016). Expression of *gdf9* appeared to increase in mature adult *amh* mutant ovaries  
84 compared to wild-type ovaries (Fig. 5E, E'), likely due to accumulating young oocytes in *amh*  
85 mutants. Testes showed negligible *gdf9* expression in either *amh* mutants or in wild-type siblings  
86 (Fig. 5F, F'). We conclude that *amh* function is necessary for the maturation of oocytes to stages in  
87 which they appear to down-regulate *gdf9* transcript.

88 Gsdf is an important signaling molecule in fish gonadogenesis (RONDEAU *et al.* 2013; IMAI *et al.*  
89 2015; ZHANG *et al.* 2016). Wild-type ovaries express *gsdf* in granulosa cells surrounding oocytes  
90 (Fig. 5G, (GAUTIER *et al.* 2011a; YAN *et al.* 2017)). Zebrafish *amh* mutant ovaries also expressed  
91 *gsdf* in epithelial cells surrounding immature oocytes (Fig. 5G'). Testes expressed *gsdf* specifically  
92 in Sertoli cells surrounding germ cells (Fig. 5H, (GAUTIER *et al.* 2011a; YAN *et al.* 2017)). Testes  
93 lacking *amh* activity showed substantially greater *gsdf* expression than normal, suggesting altered  
94 Sertoli cell development (Fig. 5H, H'). Expression of the Sertoli cell marker *amh* in *amh* mutant  
95 testes showed that Sertoli cells were poorly organized with smaller testis tubules (Fig. 5B, B'),  
96 which was confirmed by *gsdf* expression (Fig. 5H, H') and histology (Fig. 4N, P). Taken together,  
97 results from *gsdf* expression and histology analyses show that *amh* mutants appeared to have

98 many more testis tubules, but much smaller testis tubules, than normal, consistent with an increase  
99 in Sertoli cells or their precursors. We conclude that *Amh* function in adult male zebrafish is  
00 necessary for the organization and number of *gsdf*-expressing cells and may help regulate *gsdf*  
01 expression.

02 Aromatase, encoded in zebrafish ovaries by *cyp19a1a* (and in the brain by *cyp19a1b* (CHIANG *et al.*  
03 *al.* 2001a; CHIANG *et al.* 2001b)), converts testosterone to estrogen (ROUILLER-FABRE *et al.* 1998).  
04 As in humans, adult wild-type zebrafish express *cyp19a1* in granulosa cells and theca cells in  
05 ovarian follicles (Fig. 5I, (CHIANG *et al.* 2001a; CHIANG *et al.* 2001b; DRANOW *et al.* 2016)). In  
06 contrast, young stage follicles in adult zebrafish *amh* mutant ovaries showed fewer *cyp19a1a*  
07 expressing cells in patches that did not completely surround follicles (Fig. 5I'). In testes, *cyp19a1a*  
08 expression was not detected in either wild types or *amh* mutants (Fig. J, J'). We conclude that *amh*  
09 activity is required for ovarian follicles to advance to the strongly aromatase-expressing stage and  
10 for the organization of granulosa cells around ovarian follicles.

11 GATA4 in human gonads synergistically activates the *AMH* promoter by interacting with NR5A1  
12 (SF-1), a process necessary for normal human sex development (LOURENCO *et al.* 2011). In  
13 mouse, granulosa cells and theca cells express *Gata4* (PADUA 2014) and in wild-type zebrafish,  
14 oocytes express *gata4* in early stages and granulosa and theca cells express *gata4* in later stages  
15 (Fig. 5K, (YAN *et al.* 2017)). In zebrafish, adult female *amh* mutants, like wild-types, displayed *gata4*  
16 transcript in young oocytes, but it was patchy in follicular cells due presumably to alterations in  
17 follicular maturation (Fig. 5K'). Expression of *gata4* was low in both wild-type and mutant adult  
18 testes (Fig. 5L, L'). These results suggest that *amh* activity normally helps to up-regulate *gata4* in  
19 granulosa cells of wild-type ovaries.

20 *Bmpr2* is likely the type II receptor for BMP15 (MOORE *et al.* 2003; PULKKI *et al.* 2012). Zebrafish  
21 has two co-orthologs of *Bmpr2*: *bmpr2a* is expressed in young oocytes and ovarian follicle cells  
22 and *bmpr2b* is expressed in follicle cells (LI AND GE 2011; DRANOW *et al.* 2016). Our *in situ*

23 hybridization experiments confirmed the wild-type expression pattern of *bmpr2a* and showed that  
24 in mutant ovaries, *bmpr2a* expression was reduced in young oocytes but was maintained weakly  
25 in stage III follicles (Fig. 5M, M'). For *bmpr2b*, expression appeared in wild types in follicle cells, but  
26 in *amh* mutants, reduced signal was detected in follicle cells (Fig. 5O, O'). Testes in both wild types  
27 and *amh* mutants appeared to possess little expression of either *bmpr2* gene and no difference  
28 appeared to distinguish wild types from mutants (Fig. 5 N, N', P, P').

29 NR5A1 (alias steroidogenic factor 1, SF-1) interacts with Gata4 protein in cultured primary rat  
30 Sertoli cells to up-regulate *Amh* expression (TREMBLAY 2001). Zebrafish adult ovaries express  
31 *nr5a1a* (VON HOFSTEN *et al.* 2005), and our *in situ* studies showed that this expression is in  
32 granulosa cells (Fig. 5M), as it is in mammals. Adult *amh* mutant females expressed *nr5a1a* in a  
33 much-reduced and fragmented, patchy, granulosa cell layer (Fig. 5M'), showing that *Amh* is  
34 important for the organization or development of granulosa cells. Adult wild-type testes expressed  
35 *nr5a1a* in Leydig cells (Fig. 5N), but far fewer cells expressed *nr5a1a* in mutant testes compared to  
36 wild-type testes (Fig. 5N'), despite the increased number of testis tubules in *amh* mutants  
37 (compare *nr5a1a* expression in Fig. 5R, R', to *gsdf* expression in Fig. 5H, H'). We conclude that in  
38 male zebrafish, *amh* function is required for normal Leydig cell development. These results show  
39 that in both male and female adult zebrafish, cells expressing *nr5a1a* require *amh* function for  
40 normal development, and, because Nr5a1 and Gata4 proteins interact to control *Amh* expression  
41 in mammals (TREMBLAY 2001; LOURENCO *et al.* 2011), these three genes likely act in a feedback  
42 loop.

43 Vasa, a putative RNA helicase encoded by *ddx4*, is expressed in germ cells in wild-type  
44 zebrafish (Fig. 5T, U, (YOON *et al.* 1997)). Zebrafish *amh* mutants also expressed *ddx4* in germ  
45 cells in both males and females (Fig. 5T' and U'). The intensity of *vasa* signal in wild-type oocytes  
46 diminished as follicles matured (Fig. 5T, (YOON *et al.* 1997)), but in adult *amh* mutants, all oocytes  
47 showed high levels of *vasa* expression, consistent with a failure of oocyte maturation in *amh*

48 mutant ovaries (Fig. 5T, T'). In adult testes, *amh* mutants appeared to have more, but smaller,  
49 groups of germ cells than did wild-types (Fig. 5U, U'). We conclude that differences in *ddx4*  
50 expression reflect the histological differences between wild-type and *amh* mutant gonads.

51

## 52 **Zebrafish *amh* mutants help to identify gene regulatory pathways in gonad development**

53 To help understand genetic programs that regulate gonad development, we sequenced 45  
54 strand-specific RNA-seq libraries, each sample derived from a single individual fish at one of three  
55 different ages. 1) Fifteen samples comprised the gonad-containing trunks of 21dpf transitional  
56 state juveniles (eight wild types and seven *amh*<sup>-26</sup> mutants). 2) Another 15 trunks were from 35dpf  
57 juveniles (eight wild types and seven *amh*<sup>-26</sup> mutants. 3) The final 15 libraries came from mature  
58 adults at 8mpf, including seven pairs of testes (three individual wild types and four different *amh*  
59 mutants) and eight pairs of ovaries (four wild types and four *amh*<sup>-26</sup> mutants). These 45 RNA-seq  
60 libraries produced 396 million paired-end sequence reads, of which 211 million mapped to the  
61 Ensembl v91 protein-coding exons of the zebrafish GRCz10 version of the zebrafish reference  
62 genome. Two-way similarity clustering (rlog (regularized log) transformed Euclidean distances)) of  
63 all samples produced a clear separation between young juveniles, older juveniles, adult ovaries,  
64 and adult testes (Fig. 6).

65

## 66 **Genome-wide transcriptomics of wild-type adult zebrafish ovaries**

67 Interpretation of gene expression changes in developing mutant gonads requires knowledge of  
68 gene expression patterns in adult wild-type gonads (SANTOS *et al.* 2007a; SANTOS *et al.* 2007b;  
69 SREENIVASAN *et al.* 2014; LEE *et al.* 2017). We sequenced strand-specific RNA-seq libraries from  
70 ovaries of four homozygous wild-type adult females at 8mpf and testes from three homozygous  
71 wild-type adult male siblings, all of which were siblings of *amh*<sup>-26</sup> mutants. DESeq2 analysis

72 showed that 16,493 genes were differentially expressed in wild-type adult ovaries vs. testes  
73 (Supplemental Table S2).

74 Principal component analysis separated adult testes and ovaries into two distinct groups widely  
75 separated in the PC1 axis, which explained 97% of the variance (Fig. 7A). Wild-type gonads  
76 separated from *amh* mutant gonads in the PC2 axis, which explained only 1% of the variance.  
77 Importantly, *amh* mutant ovaries tended to occupy the negative portion of the space and wild-type  
78 ovaries the positive portion, but the reverse was true for testes (Fig. 7A). This result shows that  
79 along the PC2 axis, the transcriptomes of mutant ovaries tended to be more like those of wild-type  
80 males (i.e., ovaries were masculinized) but the transcriptomes of mutant testes were more like  
81 female transcriptomes (i.e., testes were feminized). Masculinization of the ovary transcriptome and  
82 feminization of the testis transcriptome reflects the dual roles of *amh* in males and females.

83 Genes with the highest over-expression in adult zebrafish wild-type ovaries vs. wild-type testes  
84 tended to have no human orthologs and no previously assigned functions. For example, three  
85 genes were massively up-regulated in zebrafish ovaries with respect to testes (*zgc:171781*,  
86 *CABZ01059627.2*, *si:ch211-125e6.12*) by 146 million-, 120 million-, and 116-million-fold,  
87 respectively. Each of these three genes has several paralogs in zebrafish, but either no orthologs  
88 or few orthologs in other species and none have known functions, although ZFIN lists *si:ch211-*  
89 *125e6.12* as Pfam:PF00059, a C-type lectin. Of the 100 most up-regulated ovary genes, only 21  
90 have gene names that imply function, including ten zona pellucida genes (*zp2.1*, *zp2.3*, *zp3.2*,  
91 *zpcx*, *zp2.5*, *zp2.6*, *zp2.2*, *zp3a.1*, *zp2l1*, *zp3a.2*), and only 11 other genes, including the ovary-  
92 specific epithelial cell tight junction gene *clndd* (1582-fold up) (CLELLAND AND KELLY 2011), the  
93 ovary-specific retinol saturase gene *retsatl* (1393-fold up) (SREENIVASAN *et al.* 2008), the ovary  
94 carbonic anhydrase gene *ca15b* (1337-fold up) (WANG *et al.* 2013), the primordial germ cell histone  
95 gene *h1m* (1213-fold up) (MULLER *et al.* 2002), two copies of the quinoid dihydropteridine  
96 reductase gene *qdprb2* (1079- and 490-fold up), the zebrafish ortholog of a gonadal soma nuclear

97 repressor gene required for germ cell development *zglp1* (785-fold up) (LI S1 *et al.* 2007), the  
98 oocyte gene *cth1* (*cysteine three histidine 1*, 579-fold up (TEKRONNIE *et al.* 1999)), the germ plasm  
99 aggregation gene *birc5b* (510-fold up) (NAIR *et al.* 2013), the extracellular matrix protein gene  
00 *ecm1a* (454-fold up), and the immune gene *crp2* (*C-reactive protein 2*, 409-fold up). We  
01 hypothesize that the large number of unannotated but highly expressed ovary-specific genes  
02 provide essential functions related to egg shells or other species-specific egg functions.

03 In addition to many genes of unknown function, most known female regulatory genes were also  
04 up-regulated in wild-type adult zebrafish ovaries compared to testes, including the Wnt-signaling  
05 genes *axin2* (24-fold up) and *rspo1* (2.1-fold up); the Foxl2-related genes *foxl2a*  
06 (ENSDARG00000042180, 49-fold up); *foxl2b* (ENSDARG00000068417, 7.4-fold up); and *foxl3*  
07 (ENSDARG00000008010, 5.3-fold up); the zona pellucida gene regulator *figla* (14-fold up), and  
08 other oocyte gene regulators like *bmp15* (41-fold up) and *gdf9* (26-fold up).

### 09 **Genome-wide transcriptomics of wild-type adult zebrafish testes**

10 Up-regulated genes in wild-type testes vs. wild-type ovaries included the sperm-specific  
11 potassium ion channel gene *cngk* (9643-fold up) (FECHNER *et al.* 2015). Genes encoding likely  
12 sperm components were the next most strongly over-expressed genes in adult wild-type testes vs.  
13 ovaries, including *ribc1* and *ribc2* (6094- and 3730-fold up, respectively), *ccdc83* (5898-fold up),  
14 and *rsph4a* and *rsph9* (5211- and 3569-fold up). Many genes annotated as being male-specific  
15 regulatory genes were also over-expressed in wild-type testis vs. wild-type ovary, including *amh*  
16 (244-fold up), *dmrt1* (411-fold up), *gsdf* (40-fold up), SoxD-related genes (*sox9a*, 47-fold up; *sox8a*,  
17 14-fold up; *sox8b*, 27-fold up; *sox10*, 4.1-fold up), and *dhh* and its receptor-encoding genes *ptch1*  
18 and *ptch2* (61-, 3.9-, and 2.9-fold up in testes, respectively). The *wt1a* and *nr0b1* (*dax1*) genes  
19 were only slightly, but significantly, elevated in wild-type testes vs. ovaries (1.7-fold and 3.1-fold,  
20 respectively). Although vitellogenin genes appeared to be upregulated in wild-type testes vs. wild-  
21 type ovaries, overall counts were so low that fold changes were likely spurious. Vtg peptides have

22 been detected in ovaries (GROH *et al.* 2013), although we saw no reads from *vtg* genes in wild type  
23 adult ovaries.

### 24 **Expression of steroid biosynthetic genes in wild-type gonads**

25 Several steroid biosynthetic genes were differentially expressed comparing adult wild-type  
26 ovaries to wild-type testes. A duplication event in the zebrafish lineage after it diverged from  
27 *Astyanax* cavefish produced tandem co-orthologs of the single-copy human gene *CYP11A1*, which  
28 encodes side-chain cleavage enzyme, the first enzyme in steroid biogenesis. The *cyp11a1* gene  
29 was 25-fold up-regulated in zebrafish ovaries but *cyp11a2* was 8.1-fold up-regulated in testes,  
30 suggesting a subfunctionalization event (FORCE *et al.* 1999). The gene encoding Hsd17b1, which  
31 converts androstenedione to testosterone and estrone (E1) to estradiol (E2), was up-regulated in  
32 ovaries 175-fold over testes. Females convert testosterone to estrogen by aromatase, and  
33 *cyp19a1a* was up regulated 65-fold in wild-type ovaries compared to wild-type testes. Male  
34 mammals and male fish convert testosterone to 11-keto-testosterone, the primary androgen in fish,  
35 using Cyp11b1 in mouse (Cyp11c1 in zebrafish) and Hsd11b2 (WANG AND ORBAN 2007; YAZAWA *et*  
36 *al.* 2008; LEE *et al.* 2017); *cyp11c1* was up-regulated 1504-fold and *hsd11b2* was up-regulated  
37 10.1-fold in wild-type testes vs. ovaries. *HSD3B1* and *HSD3B2* reside in tandem in human but their  
38 zebrafish orthologs are on two different chromosomes; we found *hsd3b2* up-regulated in ovaries  
39 (8.1-fold) and *hsd3b1* up-regulated in testes (6.4-fold).

40 This dataset (Table S2) contributes a substantial resource for understanding the normal  
41 functioning of adult zebrafish gonads and a standard for detecting the effects of mutations on  
42 gonad development.

### 43 **Gene expression in 21dpf zebrafish juveniles**

44 At 21dpf, zebrafish late larvae are transitioning to become males or females (TAKAHASHI 1977;  
45 MAACK 2003; RODRIGUEZ-MARI *et al.* 2005; WANG *et al.* 2007). Sequencing the gonad-containing



46 trunks of *amh* mutants and wild types produced 189 million paired-end reads and after  
47 preprocessing (see Supp. Data Table 1), 103 million reads mapped to protein-coding  
48 exons. Analysis identified just 24 genes differentially expressed between *amh* mutants and wild  
49 types at 21dpf. The *amh* gene itself was under-expressed 6.1-fold in *amh* mutants, but this change  
50 was just outside the limit of significance ( $p_{adj} = 0.106$ ), a result that reflects the relatively small  
51 difference between mutant and wild-type gonadal phenotypes as revealed by histology at this  
52 stage (see Fig. 3A-D) and the relative stability of transcripts from the mutated *amh* allele.

53 Transitional stage *amh* mutant fish at 21dpf expressed a number of gonadal regulatory genes  
54 abnormally. The most up-regulated gene in 21dpf *amh* mutant trunks vs. wild-type trunks was  
55 *nr0b2a* (3.03-fold up-regulated). In mammals, Nr0b2(SHP) dimerizes with Nr0b1(DAX1), thereby  
56 repressing Nr5a1(SF-1)-mediated activity of the *Amh* promoter (TREMBLAY AND VIGER 2001; IYER *et*  
57 *al.* 2006). Furthermore, the loss of *nr0b1(dax1)* in zebrafish causes female-to-male sex reversal  
58 (CHEN *et al.* 2016), in agreement with the reverse situation in which the duplication of *NR0B1* in  
59 humans causes male-to-female sex reversal (BARBARO *et al.* 2007). The up-regulation of *nr0b2a* in  
60 trunks of 21dpf *amh* mutants, as well as in adult mutant ovaries vs. wild-type ovaries (4.8-fold)  
61 suggests that *amh* normally represses *nr0b2*, and hence female development, in zebrafish. The  
62 second most up-regulated gene in 21dpf mutant trunks vs. 21dpf wild-type trunks, was the Leydig  
63 cell marker gene *cyp26a1* (2.95-fold up)(WANG *et al.* 2007), which encodes an enzyme that in  
64 zebrafish degrades retinoic acid (RODRIGUEZ-MARI *et al.* 2013), the signal for entry into meiosis  
65 (KOUBOVA *et al.* 2006; ADOLFI *et al.* 2016). The up-regulation of *cyp26a1* in *amh* mutants would  
66 likely decrease the level of retinoic acid in mutants, and thus decrease the number of cells entering  
67 meiosis, a process that oocytes begin before spermatocytes do, thus suggesting that *amh* normally  
68 depresses *cyp26a1* expression at 21dpf. Other up-regulated genes in 21dpf *amh* mutants included  
69 the proteasome activator *psme4a* (2.4-fold up in mutants and 10.3-fold up in wild-type testes vs.  
70 wild-type ovaries); the lipid metabolism gene *trim63a* (2.1-fold up); the circadian nuclear receptor

71 gene *nr1d1* (1.9-fold up in 21dpf *amh* mutants and 6.4-fold up in wild-type testes vs. wild-type  
72 ovaries); and the theca cell/Leydig cell marker *ptch2* (1.6-fold up in 21dpf *amh* mutants and 2.9-  
73 fold up in wild-type testes vs. wild-type ovaries) (YAO *et al.* 2002; WIJGERDE *et al.* 2005; HERPIN *et*  
74 *al.* 2013). Reciprocally, the most down-regulated gene in 21dpf mutant trunks vs. *amh* wild-type  
75 trunks was the complement factor H-related gene *cfhl1* (25.1-fold down in 21dpf mutant trunks and  
76 25-fold down in wild-type ovaries vs. wild-type testes). Only two other genes were significantly  
77 down-regulated by more than two-fold in mutants: an uncharacterized sulfotransferase gene  
78 (*si:dkey-236e20.3*), and a hydroxybutyrate transporter gene *slc16a6b* (HUGO *et al.* 2012). We  
79 conclude that during the transitional period, the loss of *amh* function disrupts gonad development  
80 but not in a way that appears to strictly down-regulate canonical male-related genes as expected  
81 by the hypothesis that *Amh* should up-regulate male development.

82 Unsupervised similarity clustering split the fifteen 21dpf animals into two groups (Fig. 7B):  
83 Group21-1 contained two mutants and three wild types and Group21-2 had six mutants and four  
84 wild types. Principal component analysis (Fig. 7B) clustered individuals as they had with rlog-  
85 transformed Euclidean distances (Fig. 6), bolstering the view that these are biologically meaningful  
86 groups. The two groups are separated in the PC1 dimension, which explains 56% of the variance.  
87 PC2, which explains 10% of the variance, appeared to further separate Group21-1 into two groups:  
88 *amh* mutants and wild types, but small sample size thwarted statistical analysis of genes  
89 differentially expressed between Group21-1 *amh* mutants and wild types. The finding that  
90 Group21-1 and Group21-2 both contain wild-type and mutant individuals shows that at this early  
91 stage, *amh* expression is not the main factor that allocates individual fish into two groups.

92 To identify biological factors that distinguish the two synthetic 21dpf groups, we searched for  
93 genes differentially expressed between them. Analysis identified 440 genes that met the  $p_{adj} < 0.1$   
94 criterion for false discovery rate (Supplemental Data Table S1). Genes up-regulated in Group21-1  
95 vs. Group21-2 included several genes encoding components of the chorion, which oocytes begin

96 to produce in stage IB follicles (SELMAN *et al.* 1993). These genes included the zona pellucida  
97 genes *zp2.2* (116-fold up-regulated in Group21-1 vs. Group21-2 and up-regulated 938-fold in wild-  
98 type ovary vs. wild-type testis), *zp2.5* (98-fold up and 958-fold up in wild-type ovary vs. wild-type  
99 testis), and 13 other *zp* genes. Zona pellucida genes in mouse and likely in zebrafish are controlled  
00 by the germ-cell transcription factor gene *figla* (*factor in germline-alpha*) (LIANG *et al.* 1997;  
01 ONICHTCHOUK *et al.* 2003; MOLD *et al.* 2009); consistent with this role, *figla* was up-regulated in  
02 Group21-1 vs. Group21-2 (32-fold; 14-fold up in wild-type ovary vs. wild-type testis), Group21-1  
03 also up-regulated the follicle stage I and II tight junction gene *clndd* (96-fold; 5.6-fold up in wild-  
04 type ovary vs. wild-type testis), and other oocyte genes like the oocyte carbonic anhydrase gene  
05 *ca15b* (72-fold up; 1337-fold up in wild-type ovary vs. wild-type testis) (WANG *et al.* 2013), *zar1* (66-  
06 fold up; 148-fold up in wild-type ovary vs. wild-type testis) (MIAO *et al.* 2017), *gdf9* (18-fold up; 26-  
07 fold up in wild-type ovary vs. wild-type testis), and *dazl* (11-fold up; not differentially expressed in  
08 wild-type ovary vs. wild-type testis) (HOWLEY AND HO 2000; CLELLAND AND KELLY 2011; DRANOW *et*  
09 *al.* 2016). Germ cells in Group21-1 gonads were apparently entering meiosis because they up-  
10 regulated the synaptonemal complex gene *sycp2l* relative to Group21-2 (14.6-fold up; 14-fold up in  
11 wild-type ovary vs. wild-type testis). The strong expression of many oocyte genes shows that  
12 Group21-1 juveniles had substantially more developing oocytes than Group21-2. Vitellogenin  
13 genes were also up-regulated in Group21-1 trunks relative to Group21-2 trunks, including *vtg4* (32-  
14 fold up) and *vtg2* (31-fold). Vitellogenin genes were most likely expressed in liver, which was  
15 present in trunk preparations, but might also have been expressed in adipose cells in the ovary  
16 (WANG *et al.* 2005). This result suggests that Group21-1 gonads were already secreting estrogen  
17 that up-regulated *vtg* expression, but the only granulosa or theca cell marker that was up-regulated  
18 in Group21-1 compared to Group21-2 was *cyp11a1* (27-fold up), which encodes the enzyme  
19 catalyzing the first and rate-limiting step in steroid biogenesis. We conclude that genes over-  
20 expressed in Group21-1 vs. Group21-2 characterize developing oocytes.

21 Reciprocally, Group21-2 up-regulated 18 genes relative to Group21-1 fish ( $p_{adj} < 0.1$ ). Of these  
22 18 genes, 14 were also up-regulated in wild-type testes relative to wild-type ovaries (*cap2*,  
23 *stard13a*, *si:ch211-133n4.4*, *col15a1b*, *adamts12*, *mmp13b*, *elf3*, *ift74*, *mhc1uka*, *b3gat1b*,  
24 *cyp27b1*, *BX004785.2*, *si:ch211-286b4.4*, *gstm.2*) an average of 49-fold; none were down-  
25 regulated in wild-type testis relative to wild-type ovaries; and four were not differentially expressed  
26 in wild-type gonads (*pomk*, *si:ch211-226h7.5*, *BX005421.3*, *zgc:162154*). We conclude that  
27 Group21-2, which was not expressing female genes, were expressing male genes, although few of  
28 these genes had previously been recognized as testis-related genes. Note, however, that the three  
29 most up-regulated genes in Group21-2 relative to Group 21-1 (*si:ch211-226h7.5*, *BX005421.3*,  
30 *zgc:162154*) were not differentially expressed in our ovary-vs.-testis comparison, suggesting that  
31 they may be transiently expressed in zebrafish transitioning to stable male development. We  
32 conclude that Group21-2 fish were embarking on a male pathway or were developmentally  
33 delayed with respect to Group21-1 fish.

34 We assessed the functional significance of the 440 genes differentially expressed between  
35 Group21-1 and Group21-2 samples using gene ontology (GO) analysis of biological processes (Mi  
36 *et al.* 2013). GO analysis identified 18 gene clusters at a false discovery rate (FDR)  $< 0.05$ . The top  
37 three clusters were strongly influenced by germ cell development. The highest loading enrichment  
38 cluster was “piRNA metabolic process” (FDR =  $8.70E-03$ ), and contained three genes (*henmt1*,  
39 *pld6*, and *asz1*) that were up-regulated in Group21-1 (putative females). The next highest loading  
40 enrichment cluster was “positive regulation of acrosome reaction,” (FDR  $1.7E-12$ ), with eleven of  
41 twelve genes annotated as zona pellucida genes or containing a zona pellucida domain. All were  
42 upregulated in Group21-1 samples. These same 12 genes were also the basis for the third (“egg  
43 coat formation”) and fourth (“binding of sperm to zona pellucida”) enrichment clusters. Together,  
44 the examination of individual dysregulated genes and the unbiased GO analysis agree that that  
45 among the 21dpf fish, Group21-1 juveniles are embarking on a female development and Group21-

46 2 are becoming males. This is the first demonstration of a difference between developing males  
47 and females at this early age by whole-genome transcriptomic analysis.

### 48 **Gonadal gene expression in 35dpf juveniles**

49 Sequencing the individual trunks of 15 juveniles at 35dpf (seven *amh*<sup>-28</sup> mutants and eight wild-  
50 type siblings) produced 93 million paired-end reads and after preprocessing (see Supplemental  
51 Data Table 2), 48 million reads mapped to protein-coding exons. Analysis of differential expression  
52 between wild-type and *amh* mutant samples identified 75 differentially expressed genes  
53 (Supplemental Data Table S1). Unlike the 21dpf late larvae, 35dpf mutant juveniles showed  
54 significant down-regulation of *amh* expression, the fourth most down-regulated gene in mutants  
55 (14.1-fold down).

56 The most differentially expressed up-regulated gene in 35dpf *amh* mutants was the butyrophilin  
57 subfamily immunoregulator gene *si:dkey-208m12.2* (85-fold up in mutants). Other strongly up-  
58 regulated genes in *amh* mutants were also immune related, including the novel fish interferon-  
59 stimulated genes *gig2l* (22-fold up) (ZHANG *et al.* 2013), interferon-stimulated gene-15 (*isg15*, 4.8-  
60 fold up), the interferon-induced genes *mxg* (4.1-fold up) and *mxh* (5.0-fold up) (NOVEL *et al.* 2013).  
61 Interferon regulatory factor-7 (*irf7*, 4.5-fold up) is positively correlated with male-related genes in  
62 turbot (RIBAS *et al.* 2016) and is a paralog of the trout master sex-determining gene *sdY*, a  
63 duplicated, truncated copy of *irf9* (YANO *et al.* 2012). Down-regulated genes in 35dpf *amh* mutants  
64 vs. wild-type siblings included the complement factor genes *cfhl2* (18-fold down, in *amh* 35dpf  
65 mutant trunks and 5.1-fold up in wild-type testes vs. wild-type ovaries) and *cfhl1* (18.7-fold down in  
66 *amh* 35dpf mutant trunks and 25-fold up in wild-type mature testes vs. ovaries); *cfhl1* was also the  
67 most strongly down-regulated gene in 21dpf *amh* mutant trunks vs. wild-type trunks (25.1-fold  
68 down). These results suggest that at 35dpf, gonads developing in *amh* mutants may experience  
69 cell damage that evokes an inflammatory response.

70 Similarity clustering based on globally correlated gene expression patterns resolved 35dpf  
71 samples into two distinct groups, and within those two major groups, wild types separated from  
72 *amh* mutants but with short branches in the tree (Fig. 6). Principal component analysis sorted  
73 35dpf animals into the same two groups (Group35-1 and Group35-2), primarily along PC1, which  
74 explained 92% of the variance (Fig. 7C). Because each synthetic group included both *amh*  
75 mutants and wild types, differences other than genotype at the *amh* locus were important for  
76 distinguishing between major groups at 35dp. Within each of the two groups separated along PC1,  
77 mutants tended to occupy the lower portion of the plot and wild types the upper portion along the  
78 PC2 axis (Fig. 7C), even though this axis explained only 4% of the overall variance. Separation  
79 along PC2 may have resulted from expression changes in genes downstream of Amh function.

80 Analysis of genes differentially expressed between these Group35-1 and Group35-2 yielded  
81 8,728 differentially expressed genes (Supplemental Table S1). The most differentially expressed  
82 genes between the trunks of Group35-1 and Group35-2 juveniles encode the egg yolk protein  
83 Vitellogenin-1 (*vtg1*, 929-fold up-regulated in Group35-1), with other *vtg* genes also highly  
84 upregulated (e.g., *vtg2*, 445-fold up in Group35-1 and *vtg4*, 319-fold up). The strong up-regulation  
85 of *vtg* gene expression in Group35-1 animals suggests first, that they are developing as females  
86 and second, that their livers had activated *vtg* genes due to secretion of higher levels of estrogen  
87 than Group35-2 fish, and thus, third, that their granulosa and theca cells were already functioning.  
88 Group35-1 animals also expressed differentially the female-enriched cell-cycle gene *btg4* (SMALL  
89 *et al.* 2009) (431-fold up), as well as several zona pellucida-encoding genes including *zp211* (247-  
90 fold up), *zpcx* (265-fold up), and *zp2.2* (214-fold up) along with their putative regulator *figla* (165-  
91 fold up). Group35-1 animals also expressed the meiosis gene *sycp2l* (120-fold up). These results  
92 show that Group35-1 animals had initiated a female pattern of developmental gene expression.

93 Reciprocally, the most up-regulated gene in Group35-2 relative to Group35-1 was  
94 transglutaminase-1-like-2 (*tgm1l2*, 65-fold up), which has not previously been documented as sex

95 specific and has an unclear human ortholog, but was greatly over-expressed in wild-type testes vs.  
96 wild-type ovaries (72-fold up). This finding suggests the hypothesis that Group35-2 fish were  
97 embarking on a male developmental pathway. Group35-2 had increased expression of a number  
98 of other male-specific genes relative to Group35-1, including *amh* (46-fold up); the sperm-specific  
99 potassium ion channel gene *cngk* (18-fold up) (FECHNER *et al.* 2015); an acyl-CoA thioesterase  
00 gene *acot17* (17-fold up) that was also over-expressed by adult wild-type testes vs. wild type  
01 ovaries (6.3-fold over-expressed in testes), but whose expression is otherwise unstudied; *ankar*,  
02 which human testes over-express compared to any other organ (FAGERBERG *et al.* 2014) (14-fold  
03 up in Group35-2); the male factor *dmrt1* (13-fold up) (WEBSTER *et al.* 2017); heat shock  
04 transcription factor 5 (*hsf5*, 11-fold up), whose human ortholog is expressed almost exclusively in  
05 testis (FAGERBERG *et al.* 2014); *fank1*, the mammalian ortholog of which is exclusively expressed in  
06 pachytene spermatocytes and spermatids (ZHENG *et al.* 2007) (11-fold up); the sperm-motility gene  
07 *t-complex-associated-testis-expressed-1* (*tcte1*, 9.8-fold up); and the testosterone-synthesizing  
08 enzyme gene *cyp11c1* (8.2-fold up in Group35-2). These results show that Group35-2 individuals  
09 were becoming males. Group35-2 individuals also had increased expression of the synaptonemal  
10 complex encoding genes *sycp3* (16-fold up in Group35-2) and *sycp2* (8.7-fold up), and the DNA  
11 meiotic recombinase-1 gene (*dmc1*, 11-fold up), likely reflecting a large number of spermatogonia  
12 preparing to undergo meiosis in Group35-2 fish compared to fewer meiotic cells in Group35-1  
13 individuals. We conclude that Group35-2 fish were beginning to mature their testes, as judged by  
14 their stronger expression of male-related genes compared to Group35-1 (putative females).

15 Within Group35-2, all of the *amh* mutant samples were substantially shifted in the PC1  
16 dimension towards Group35-1 with respect to the wild-type samples. Because Group35-1 were  
17 expressing female genes and Group35-2 were expressing male genes, this finding shows that  
18 35dpf fish lacking *amh* activity tend to be feminized in terms of their gene expression. Likewise,  
19 within Group35-1, all three of the *amh* mutants were closer to Group35-2 than five of the six wild

20 types in the PC1 axis. This result suggests that zebrafish juveniles developing as females tend to  
21 be somewhat masculinized in the absence of *amh* activity. These observations confirm the utility of  
22 *Amh* in both male and female development.

23 Expression patterns of the 35dpf putatively male (Group35-2) fish were strongly correlated to  
24 expression patterns of the 21dpf Group21-2 (not obviously female) fish. Of the 18 genes that were  
25 significantly differentially up-regulated in putative non-female Group21-2 fish (Fig. 7C), eleven  
26 (*zgc:162154*, *BX005421.3*, *BX004785.2*, *mhc1uka*, *elf3*, *adamts12*, *mmp13b*, *cap2*, *stard13a*,  
27 *si:ch211-133n4.4*, *col15a1b*) were also significantly differentially up-regulated in the male gene-  
28 expressing 35dpf cohort (Group35-2, Fig. 7C) at an average of 2.9-fold, with the amount of up-  
29 regulation highly correlated between the 21dpf and 35dpf datasets (correlation coefficient of 0.97).  
30 The seven other genes significantly up-regulated in the not-female Group21-2 (*pomk*, *ift74*,  
31 *b3gat1b*, *cyp27b1*, *si:ch211-286b4.4*, *gstm.2*, *si:ch211-226h7.5*) were not differentially expressed  
32 between the two 35dpf synthetic groups. Of the 25 most up-regulated differentially expressed  
33 genes in the male-like Group35-2 relative to Group35-1, all but one were also up-regulated in wild-  
34 type testis relative to wild-type ovary an average of 1922-fold (*tgm1l2*, *zgc:158427*, *amh*, *cngk*,  
35 *acot17*, *sycp3*, *gstk4*, *ankar*, *dmrt1*, *si:ch211-242f23.3*, *pimr214*, *hormad1*, *si:dkeyp-50b9.1*, *ifit16*,  
36 *hsf5*, *dmc1*, *fank1*, *si:dkeyp-80c12.8*, *ttc29*, *spag16*, *tcte1*, *dnah6*, *hbaa2*, *tekt1*). Only one gene  
37 up-regulated in Group35-2 (*CABZ01076758.1*) was not differentially expressed in wild-type testis  
38 compared to wild-type ovary. We conclude that, despite the fact that up-regulated genes in the  
39 non-female 21dpf group were mostly not previously known to be male-related genes, their  
40 continued up-regulation in the group of 35dpf fish that were expressing many clearly male genes  
41 shows that fish in Group21-2 were also developing male characteristics. These experiments thus  
42 identify a previously unknown cohort of sex-specific genes expressed early in gonadogenesis.

43 Gene ontology analysis of differentially expressed genes comparing the two 35dpf groups  
44 yielded 44 enrichment clusters (FDR,  $p < 0.05$ ). The most significantly enriched cluster contained 22



45 genes enriched for “negative regulation of mitotic cell cycle phase transition” (FDR=3.0E-02).  
46 Among these genes were mitotic checkpoint genes (*bub1bb*, *bub1*, *hus1*, *mad111*, and *rad17*), and  
47 a variety of DNA repair genes (*oraov1*, *orc1*, *mre11a*, *blm*, and *msh6*). All were up-regulated in  
48 female-like Group35-1. The second cluster included 30 genes enriched for “mitotic cell cycle  
49 checkpoint” (FDR= 5.93E-03), with an expanded list of checkpoint and DNA repair genes similar to  
50 the first cluster, including *rad9a*, *rad9b*, *eme1*, and *msh2*. All were up-regulated in Group35-1  
51 except *rad9b*, suggesting a negative correlation of the co-orthologs *rad9a* and *rad9b* and their  
52 possible subfunctionalization. The third enrichment cluster comprised 41 genes enriched for “DNA-  
53 dependent DNA replication” (FDR = 3.60E-03). These included a variety of DNA polymerases  
54 (*polg*, *poln*, *pola2*, *pole2*, and *pold2*) and associated DNA binding proteins (*orc1*, *orc3*, *orc6*, *rpa1*,  
55 *msh2*, *cdc45*, and *wdhd1*). All but *poln* were up-regulated in Group35-1, female-like fish. This  
56 cluster also included the up-regulated early onset breast cancer and Fanconi anemia gene  
57 *brca2(fancd1)*. Nine other Fanconi anemia genes were also significantly up-regulated in the  
58 DESeq2 analysis for Group35-1 vs. Group35-2 (*fanca*, *fancb*, *fancc*, *fancd2*, *fance*, *fancf*, *fancg*,  
59 *fanci*, *fancm*). These GO enrichment terms for the two 35dpf juvenile groups differed markedly  
60 from the GO terms discovered for the two 21dpf late larval groups. At 21dpf, germ cell functions  
61 (piRNAs and egg-shell genes) dominated GO terms differentially expressed between the two  
62 groups, but at 35dpf, cell cycle and DNA-repair genes were most differentially expressed between  
63 the two groups.

#### 64 **Amh activities regulate adult testis gene expression patterns**

65 To help understand the molecular genetic basis for abnormal testis morphologies caused by  
66 loss of *amh* function, we sequenced seven libraries of 8mpf adult testes, one each for three wild-  
67 types and four *amh*<sup>-26</sup> mutants. Sequencing produced 54 million paired end reads, of which 24  
68 million passed quality filters and mapped to the zebrafish genome assembly. DESeq2 identified  
69 3,902 differentially expressed genes (Supplemental Table S2). Similarity clustering (Fig. 6) and

70 PCA based on correlated gene expression (Fig. 7A) placed all seven testis samples together, with  
71 clear separation between wild types and *amh* mutants. As predicted, *amh* was significantly down-  
72 regulated in mutant testes (*amh* 6.7-fold down in mutants).

73 The first three most up-regulated genes in mutant testes vs. wild-type testes were the same as  
74 the first three most up-regulated genes in wild-type ovaries vs. wild-type testes (*CABZ01059627.2*,  
75 *si:ch211-125e6.12*, *zgc:171781*, up-regulated about 239,000-, 116,000-, and 90,000-fold  
76 respectively). This result shows that *amh* mutant testes greatly up-regulated ovary-specific genes,  
77 suggesting a partial feminization of adult *amh* mutant testes, which could happen by the retention  
78 of the early oocytes that were detected by histology (see Fig. 4O, S).

79 Leydig cell markers were mostly down-regulated in *amh* mutant testes compared to wild-type  
80 testes, consistent with our previous analysis of *nr5a1a* expression, which labels Leydig cells (Fig.  
81 S, S'). Zebrafish orthologs of 16 of 50 Leydig cell marker genes (UHLEN *et al.* 2015) were  
82 differentially expressed in zebrafish *amh* mutant testes vs. wild-type testes. The zebrafish  
83 orthologs of 14 of these 16 human Leydig cell marker genes (*DHH*, *APOE*, *AMH*, *FDX1*, *CYP17A1*,  
84 *AK1*, *CNTRL*, *SGPL1*, *EPHX1*, *CCS*, *ELOA2*, *ACLY*, *TMF1*, *CLEC16A*) were down-regulated in  
85 *amh*-mutant testes an average of 3.6-fold, and orthologs of only two (*CACNA1H* and *PRSS12*)  
86 were up-regulated (average of 2.8-fold). The down-regulated genes included *dhh* (down 13-fold),  
87 which triggers Leydig cell differentiation (YAO *et al.* 2002), and *cyp17a1* (down 4.3-fold), which  
88 encodes the second enzyme in the testosterone biosynthesis pathway. We conclude that loss of  
89 *amh* function disrupts the specification, proliferation, or functioning of Leydig cells in adult zebrafish  
90 testis, supporting conclusions from our *in situ* hybridization analyses (see Fig. 5N, N').

91 Sertoli cell marker genes responded in various ways to the loss of *amh* activity. Zebrafish has  
92 orthologs of 38 of 50 human Sertoli cell marker genes (UHLEN *et al.* 2015). Several Sertoli cell  
93 genes were up-regulated in mutant testis relative to wild-type testis (*gsdf*, 3.4-fold up; *fndc7a*, 2.40-  
94 fold; and *ddx3a*, 1.30-fold) but seven were down-regulated in mutants, including *amh* itself (2.8-fold

95 down, as well as *arid4a*, *alg11*, *fndc3a*, *lrig1*, *abhd2b*, *sox8b*, and *cst3*, an average of 2.1-fold  
96 down (Supplemental Table 2). Many Sertoli cell regulatory genes, including *acvr2aa*, *acvr2ab*,  
97 *dmrt1*, *fshb*, *fshr*, *hsd17b4*, *inha*, *nr0b1*, *sox9a*, and *sox9b*, were not differentially expressed  
98 between mutant and wild type testes. These results suggest that *amh* tends to inhibit some Sertoli  
99 cell functions, but not strongly. Recall that our *in situ* hybridization data showed mainly a change in  
00 the spatial distribution of Sertoli cells (see Fig. 5B, B', H, H').

01 Germ cells in *amh* mutant testes seemed to develop rather normally from a histological  
02 perspective, although mutant testes accumulated many more germ cells than normal (see Fig. 4U,  
03 U'). The Human Protein Atlas lists 50 genes strongly expressed in spermatogonia, but only 15 of  
04 these have orthologs or closely related paralogs in zebrafish. None of these 15 germ cell genes  
05 was up-regulated in *amh* mutant testes vs. wild-type testes and only three (*brd2a*, *CU929144.1*  
06 (alias *cfap46*), and *meiob*) were down-regulated (an average of 2.3-fold), while twelve (*acvr2ba*,  
07 *acvr2b*, *brip1*, *cbl*, *dazl*, *dmrt1*, *dync1h1*, *hmga2*, *mgea5*, *mgea5l*, *mtmr3*, *nanos3*, *plk4*, *uchl1*)  
08 were not differentially expressed. For 51 human spermatocyte marker genes in the Human Protein  
09 Atlas, only 19 have zebrafish orthologs. One gene (*BCL6*) has two zebrafish co-orthologs, and  
10 although one co-ortholog (*bcl6a*) was up-regulated (2.5-fold) in *amh* mutant testes, it's co-ortholog  
11 (*bcl6b*) was down-regulated (5.5-fold). The zebrafish orthologs of seven human spermatocyte  
12 genes were down-regulated an average of 3.1-fold (*bcl6b*, *clgn*, *cremb*, *ccdc65*, *crema*, *rnf32*,  
13 *tekt1*) consistent with a role for *amh* in spermatogenesis.

14 Gene ontology analysis of *amh* mutant testes vs. wild-type testes identified ten GO clusters  
15 (FDR<0.05). The highest loading cluster included 22 genes enriched for "interciliary transport,"  
16 including intraflagellar transport proteins (e.g. *ift27*, *ift57*, *ift74*, and *ift81*, all down-regulated in  
17 mutants 2- to 3-fold) and tetratricopeptide repeat domains (*ttc21b* and *ttc26* (1.9 and 2.1 fold down-  
18 regulated)). The second cluster contained 38 genes enriched for "axoneme assembly", including  
19 dynein-related genes down-regulated in mutants (e.g. *dnah3*, *dnah5*, *dnah12*, *dnai1.2*), and genes

20 encoding coiled-coil domain proteins (*ccdc39*, *ccdc103*, *ccdc114*, and *ccdc151*). Down-regulation  
21 of genes involved in microtubule assembly is consistent with defects in the ability of *amh* mutants  
22 to produce mature sperm with fully developed tails. We conclude that sperm maturation was  
23 suppressed in *amh* mutant testes, which likely contributed to observed loss of fertility as animals  
24 aged.

### 25 **Amh activities regulate adult ovary gene expression patterns**

26 To understand the genetic effects of Amh on zebrafish ovary development, we investigated  
27 gene expression patterns of ovaries from four *amh* mutants and four of their wild-type siblings in  
28 eight individual libraries. Sequencing produced 114 million paired-end reads, 60 million of which  
29 mapped to the Ensembl v91 protein coding exons in GRCz10. Similarity clustering using the entire  
30 45-sample dataset placed all ovary samples together on a long branch, indicating a unique  
31 transcriptional profile (Fig. 6). Within the eight ovary samples, *amh* mutant ovaries occupied a  
32 different branch from wild-type ovaries (Fig. 6); this result contrasts to the 21dpf and 35dpf  
33 samples where *amh* mutants and wild types intermixed within each age group and within sub-  
34 groups (Fig. 6). We conclude that developmental processes that depend on Amh are stronger in  
35 adult ovaries than in 21dpf or 35dpf animals.

36 DESeq2 identified 7,426 genes differentially expressed in mutant vs. wild-type ovaries  
37 (Supplemental Table S2). Although *amh* was down-regulated in mutant ovaries compared to wild-  
38 type ovaries (2.4-fold down), this difference was just short of reaching statistical significance  
39 ( $\text{padj}=0.102$ ). A comparison of adult *amh* mutant ovaries to adult wild-type ovaries showed that the  
40 top six most differentially expressed genes in terms of fold change encode vitellogenins. Zebrafish  
41 express vitellogenin genes not only in their livers in response to estrogen as do egg-laying  
42 tetrapods, but also in adipocytes in their ovaries (WANG *et al.* 2005). Over-expression of *vtg* genes  
43 in *amh* mutant ovaries is not due to contamination from liver in our samples by dissection errors  
44 because zebrafish liver marker genes, such as *fga*, *fgb*, *fabp10a*, *hmgcra*, and *hmgcrb*, as well as

45 zebrafish orthologs of human liver marker genes including *apoa2*, *a1bg*, *ahsg*, *f2*, *cfhr2*, *hpx*, *f9*  
46 (UHLEN *et al.* 2015) were not differentially expressed between mutant and wild-type ovaries in our  
47 samples. This result is consistent with our morphological studies, which showed that the mutant  
48 ovary accumulates enormous quantities of follicles stalled in a pre-vitellogenic state (Fig. 4E, F). If  
49 a negative feedback mechanism were in place that senses yolky oocytes and inhibits the  
50 transcription of *vtg* genes in ovarian cell types (WANG *et al.* 2005), then the absence of yolky  
51 oocytes would result in continuous up-regulation of *vtg* gene expression.

52 Many ovarian regulatory genes were greatly under-expressed in adult mutant ovaries compared  
53 to wild-type ovaries. Granulosa cell marker genes (HATZIRODOS *et al.* 2015) tended to be down-  
54 regulated in *amh* mutant ovaries vs. wild-type ovaries, including aromatase (*cyp19a1a*, 18.7-fold  
55 down in mutant ovaries), *nr5a2* (12.4-fold down), luteinizing hormone receptor (*lhcg*, 12.6-fold  
56 down), *gata4* (25.8-fold down), the estrogen receptors *esr1* (4.0-fold down) and *esr2b* (6.9-fold  
57 down), *foxl2a* (ENSDARG00000042180, 5.7-fold down), *foxl2b* (ENSDARG00000068417, 4.4-fold  
58 down), and *slc35g1* (7.3-fold down). Theca cell marker genes (HATZIRODOS *et al.* 2015) were also  
59 down-regulated: *insl3* (23.6-fold down), *nid1b* (10.3-fold down), *nr5a1a* (16.1-fold down), *nr5a1b*  
60 (2.9-fold down), *star* (3.8-fold down), *cyp11a2* (3.4-fold down), and *hsd3b1* (3.4-fold down). These  
61 results show that expression of marker genes for both granulosa cells and theca cells are down-  
62 regulated and confirm *in situ* hybridization results (Fig. 5) that showed significant disruption of  
63 follicle cell morphologies in *amh* mutants.

64 Given the great enlargement of *amh* mutant gonads (Fig. 4A, B, E, F), it was unexpected to find  
65 that many key oocyte marker genes were not expressed differentially between *amh* mutants and  
66 wild types, including *vasa*, *dnd1*, *piwi* paralogs, *bmp15*, *gdf9*, *nanos* paralogs, *sycp* synaptonemal  
67 complex genes, and zona pellucida genes (LIU *et al.* 2006). This finding was further surprising  
68 given that most of these genes were mis-regulated in the putative female vs. putative male  
69 synthetic groups for the 21dpf and 35dpf time points. Some markers of meiosis were up-regulated

70 in mutant ovaries compared to wild-type ovaries (*spo11* (2.1-fold up), *rad51d* (3.1-fold up)), but  
71 others, like *dmc1* and synaptonemal complex genes, were not differentially expressed. These  
72 results may suggest that the large number of mutant oocytes accumulated by mutant ovaries had  
73 stalled at an early stage of meiosis.

74 Gene ontology analysis (PANTHER (Mi *et al.* 2013)) identified 49 enrichment clusters  
75 comparing genes differentially expressed between adult *amh* mutant ovaries and adult wild-type  
76 ovaries (FDR<0.05). The highest loading cluster was “ribosomal large subunit assembly” (FDR =  
77 2.59E-02), and was comprised of 17 genes, including various ribosomal protein genes (*rpl3*, *rpl5a*,  
78 *rpl5b*, *rpl6*, *rpl11*, *rpl12*, and *rpl23a*) that were up-regulated in *amh* mutant ovaries compared to  
79 wild-type ovaries. The second cluster was “cytoplasmic translation” (FDR = 1.49E-03), and was  
80 comprised of 28 genes including additional upregulated ribosomal protein genes (e.g. *rpl7*, *rpl9*,  
81 *rpl22l1*, *rpl26*, *rpl29*, and *rpl31*), and translation initiation factors (*etf1b*, *eif3a*, *eif3m*, *eif4h*, and  
82 *eif4bb*). The third cluster was “maturation of large subunit-rRNA (FDR = 4.81E-02) and contained  
83 18 up-regulated ribosomal biogenesis protein genes (e.g., *wdr12*, *nsa2*, *las1l*, and *rpf2*), as well as  
84 additional ribosomal proteins (e.g. *nhp2*, *rpl7*, *rpl10a*, and *rpl35*). These clusters reflect the  
85 massive accumulation of ribosomes that maturing eggs normally store. Other gene ontology  
86 enrichments indicated coordination of replication, transcription, and translation. These results are  
87 expected from the morphological studies that showed massive changes in oocyte accumulation  
88 and defects in follicle development (Fig. 4E, F, I, J).

### 89 **The lack of *amhr2* in the genomes of zebrafish and other cyprinids is associated with a** 90 **chromosome rearrangement breakpoint**

91 AMH in mammals binds to the receptor AMHR2. Humans lacking function of either *AMH* or  
92 *AMHR2* have persistent Müllerian ducts and *Amh;Amhr2* double mutant mice have the same  
93 phenotype as either single mutant, showing that the ligand and receptor act in the same pathway  
94 (IMBEAUD *et al.* 1996; MISHINA *et al.* 1996). *Amhr2* makes a dimer with one of the *Bmpr1* proteins,

95 and the zebrafish mutant phenotype for *bmpr1bb* mimics the *amh* mutant phenotype reported here  
96 for the enlarged testes and accumulation of immature oocytes, but the *bmpr1bb* mutant males did  
97 not retain oocytes like the *amh* mutant testes did (NEUMANN *et al.* 2011). In addition, the *bmpr1bb*  
98 mutants did not appear to alter the sex ratio as did the *amh* mutants (NEUMANN *et al.* 2011).  
99 Percomorph fish genomes generally contain an ortholog of *Amhr2* (e.g., stickleback, (*Gasterosteus*  
00 *aculeatus*, ENSGACG00000006672). In contrast to percomorphs, zebrafish is an otophysan  
01 teleost, and at least two suborders of otophysans also possess an *amhr2* gene, the characiform  
02 suborder, including both red-bellied piranha (*Pygocentrus nattereri*, ENSPNAG00000001197) and  
03 cavefish (*Astyanax mexicanus*, ENSAMXG000000024722), and the siluriform suborder, including  
04 channel catfish (*Ictalurus punctatus*, ENSIPUG00000006414). In contrast, zebrafish in the  
05 cypriniform suborder of otophysans appears to lack *amhr2* (RIBAS *et al.* 2016).

06 To understand whether this apparent loss of *amhr2* is unique to zebrafish (which could then  
07 either be a zebrafish-specific loss or a genome assembly error) or whether it might represent an  
08 event shared among cypriniforms, we studied conserved syntenies. Results showed that the  
09 *amhr2*-containing region of cavefish (Supplemental Figure S2A) corresponds to three widely  
10 scattered portions of the zebrafish genome (Fig. S2B, C), with a break in conserved syntenies  
11 occurring at the predicted location of *amhr2* and its nearest neighbor (ENSAMXG000000024723,  
12 *cell division cycle associated 7*), which is also present in most percomorphs but is missing from  
13 zebrafish. Duplicates of the zebrafish orthologs of genes flanking *amhr2* in cavefish that originated  
14 in the teleost genome duplication are on two different zebrafish chromosomes, Dre2 and Dre22  
15 (Fig. S2). These data are consistent with the hypothesis that both *amhr2* and its neighbor  
16 ENSAMXG000000024723 disappeared in the zebrafish lineage after it diverged from other  
17 otophysans associated with a chromosome inversion breakpoint at the ancestral site of *amhr2*.

18 To determine whether the rearrangement breakpoint at the expected position of *amhr2* is  
19 zebrafish specific, we examined the genomes of two other cypriniform fish: common carp

20 (*Cyprinus carpio*) and goldfish (*Carassius auratus*). BLASTP searches using cavefish Amhr2  
21 against common carp and goldfish genomes did not identify an Amhr2 ortholog, but brought back  
22 Tgfr2b as the most similar protein, suggesting that these cyprinids, like zebrafish, have no  
23 ortholog of *amhr2*. (Note that BLASTP searches of cavefish Amhr2 vs. zebrafish brought back as  
24 the two top hits Bmpr2a and then Bmpr2b.) Conserved synteny analysis showed that zebrafish and  
25 common carp share gene orders at the location predicted for *amhr2* (Supplemental Fig. S2). This  
26 result is predicted by the hypothesis that a chromosome rearrangement with a breakpoint in or  
27 near *amhr2* destroyed this gene and that the event occurred after cyprinid otophysans diverged  
28 from characiform and siluriform otophysan teleosts, but before the divergence of the zebrafish and  
29 carp lineages.

## 30 DISCUSSION

31 In human male fetuses, Sertoli cells secrete Anti-Müllerian Hormone, which causes developing  
32 Müllerian ducts to disappear, while in adult human females, AMH suppresses the initiation of  
33 primary follicle growth, serves as a marker for ovarian reserve, and provides an assay for  
34 conditions like polycystic ovarian syndrome (PCOS) (CARLSSON *et al.* 2006; DIAMANTI-KANDARAKIS  
35 2008). Teleost fish do not have Müllerian ducts but nevertheless maintain an *amh* gene (ADOLFI *et*  
36 *al.* 2018). To investigate conserved roles of Amh in vertebrates that lack a Müllerian duct, we made  
37 zebrafish *amh* null activity alleles.

38 Results showed that *amh* activity promotes, but is not essential for, male development in  
39 zebrafish because homozygous *amh* mutants were only about 20% as likely to develop into males  
40 as their wild-type siblings (see also (LIN *et al.* 2017)). In addition, most mature adult male mutant  
41 gonads we examined contained a few early stage oocytes while at the same age, wild-type siblings  
42 did not. This finding shows that Amh normally masculinizes zebrafish by inhibiting the development  
43 or survival of young oocytes. Several fish species expand the male-biasing role of *amh*, having  
44 evolved a modified gene duplicate that has become the major sex determinant. For example,



45 Patagonian pejerrey and Nile tilapia possess *amh* gene duplicates that independently became the  
46 primary sex determinant (HATTORI *et al.* 2012; LI *et al.* 2015); ling cod also possesses a male-  
47 specific *amh* duplication (RONDEAU *et al.* 2016). A further demonstration of the role of the *amh*  
48 pathway is the finding that variants of the Amh receptor gene *amhr2* provide the primary sex  
49 determinant in several species of pufferfish (KAMIYA *et al.* 2012; IEDA *et al.* 2018). In tetrapods and  
50 most teleosts, Amh receptor type II (*Amhr2*) is expressed in Leydig and Sertoli cells (RACINE C *et*  
51 *al.* 199; DI CLEMENTE N *et al.* 1994) and mediates Amh signaling. Zebrafish, however, has no  
52 ortholog of *Amhr2*, which we show here is associated with an inversion breakpoint. Because we  
53 show that Amh is critical for zebrafish gonad development, the function of *Amhr2* is likely  
54 performed by another *Bmpr2* paralog. Zebrafish has two *bmpr2* ohnologs; *bmpr2a* is expressed in  
55 young oocytes and in ovarian follicle cells and *bmpr2b* is expressed in follicle cells (LI AND GE  
56 2011; DRANOW *et al.* 2016). We found that *bmpr2a* was over-expressed in adult wild-type testis vs.  
57 wild-type ovary (4.7-fold), and both *bmpr2a* and *bmpr2b* were under-expressed in *amh* mutant  
58 ovary vs. wild-type ovary (4.7-fold and 6.2-fold, respectively), but we did not detect differential  
59 expression of any *bmpr2* genes comparing putative female and putative male groups of 21dpf or  
60 35dpf juveniles.

61 Young zebrafish *amh* mutant females are fertile, showing that they have functional reproductive  
62 ducts. As female *amh* mutants age, however, they become sterile, showing that Amh supports  
63 continued female fertility. Zebrafish males lacking *amh* activity are less effective than their wild-  
64 type male siblings at stimulating wild-type females to lay eggs, showing that Amh action improves  
65 male mating behavior. It is as yet unknown whether this difference is related to changes in brain  
66 organization that depend on the developmental availability of Amh. Likewise, mouse mutants  
67 lacking either Amh or *Amhr2* show feminized spinal motor neurons and some feminized behaviors  
68 (WANG *et al.* 2009). Some wild-type eggs that were fertilized by mutant males develop to hatching,  
69 showing that functional male reproductive ducts form without the benefit of Amh. Nevertheless,

70 eggs laid by wild-type females in the presence of *amh* mutant males are less likely to develop than  
71 those fertilized by wild-type males, showing that Amh helps optimize sperm production, function, or  
72 release. We conclude that in zebrafish, Amh is not necessary for the development of reproductive  
73 ducts or for the initiation of functional gamete formation, but is necessary for continued fertility in  
74 both sexes.

75 Wild-type siblings of our *amh* mutants had gonads with stage I oocytes at 21dpf as expected  
76 (TAKAHASHI 1977; SELMAN *et al.* 1993; RODRIGUEZ-MARI *et al.* 2005; WANG AND ORBAN 2007;  
77 RODRIGUEZ-MARI *et al.* 2010), but some 21dpf *amh* mutants had gonads that contained only  
78 undifferentiated germ cells, suggesting that *amh* activity helps to accelerate gonad development.  
79 By 35dpf, about half of wild-type siblings were continuing to develop oocytes and the other half  
80 were forming spermatocytes, but most *amh* mutants were developing normal-looking ovaries and  
81 few were developing spermatogonia. We conclude that *amh* mutants are slow to adapt a male  
82 phenotype, and many never do, leading to a female-biased sex ratio among *amh* mutants.

83 Ovaries in mature adult *amh* mutant females were swollen by immature oocytes to nearly three  
84 times the size of ovaries in wild-type siblings, confirming previous results (LIN *et al.* 2017). The  
85 ovarian phenotype of zebrafish *amh* mutants mimics the phenotype of *gsdf* mutants in zebrafish  
86 (YAN *et al.* 2017), of Amh receptor mutants in female medaka (HATTORI *et al.* 2012), and of  
87 polycystic ovarian syndrome in humans (DIAMANTI-KANDARAKIS 2008). We conclude that Amh  
88 represses primordial oocyte proliferation but stimulates oocyte maturation in zebrafish.  
89 Suppression of oocyte maturation appears to be a role of Amh shared by fish and mammals  
90 because mice lacking Amh show premature depletion of the primordial follicle pool (DURLINGER *et al.*  
91 *et al.* 1999), likely because Amh slows follicle growth in zebrafish and mammals as it does in humans  
92 (CARLSSON *et al.* 2006). Zebrafish males lacking *amh* activity also had greatly enlarged gonads (LIN  
93 *et al.* 2017), showing that in zebrafish, Amh helps slow gonad growth both in males and in females.  
94 In contrast to females, however, males even at 18mpf appeared to contain mature gametes,

95 although these males were sterile, demonstrating -- somewhat paradoxically -- that, although Amh  
96 normally nudges juvenile zebrafish towards a male pathway, its activity in older fish is required for  
97 oocyte maturation (no *amh* mutant female produced mature eggs at 11mpf) but appears only to  
98 accelerate spermatocyte maturation (3% of eggs laid by wild-type females developed after mating  
99 with mutant males at 11mpf).

00 The finding of the similarity of the phenotypes of zebrafish *amh* and *gsdf* mutants raised the  
01 question of whether these genes regulate germ cell proliferation and differentiation by acting in the  
02 same or different pathways. Because results showed that *amh;gsdf* double mutant gonads were no  
03 more compromised than either single mutant, we conclude that *amh* and *gsdf* act in the same  
04 pathway. Sertoli cells and granulosa cells both express both *amh* and *gsdf* (RODRIGUEZ-MARI *et al.*  
05 2005; VON HOFSTEN *et al.* 2005; GAUTIER *et al.* 2011a; GAUTIER *et al.* 2011b; YAN *et al.* 2017).  
06 Zebrafish lacks an ortholog of *amhr2*, which encodes the Amh receptor found in other vertebrates,  
07 and the receptor for Gsdf is unknown, so the relative positions of Amh and Gsdf in a shared  
08 developmental pathway are currently ripe for further investigation.

09 Differences in gene expression patterns in mutants compared to wild types give clues to how  
10 genes exert their effects. We studied altered gene expression patterns in *amh* mutants in two  
11 ways: by *in situ* hybridization and by whole genome transcriptome analyses. *In situ* hybridization  
12 experiments revealed reduced *amh* transcript accumulation in granulosa cells and disrupted  
13 organization of *amh*-expressing Sertoli cells. The lack of Amh activity appeared to result in an up-  
14 regulation of *gsdf* expression in Sertoli cells both in our *in situ* hybridization data and in our RNA-  
15 seq data (3.39-fold up-regulated in mutant testes (Supplemental Table 2)), suggesting that if Amh  
16 and Gsdf act in the same pathway, Amh may repress *gsdf* activity. Reciprocally, *amh* expression  
17 was up-regulated 1.8 fold in our *gsdf* mutants (YAN *et al.* 2017), showing interdependent regulation  
18 of *amh* and *gsdf* genes. The down-regulation of the aromatase gene in zebrafish *amh* mutants and  
19 the failure of aromatase-expressing cells to completely envelop oocytes suggests that Amh is

20 required for proper development of granulosa cells to the stage appropriate for maximal aromatase  
21 expression. With depressed aromatase activity, levels of estrogen should diminish, thereby  
22 inhibiting oocyte maturation, which we observed. An additional contributor to endocrine disruption  
23 would be our finding of the greatly reduced expression of *nr5a1a* – which encodes a nuclear  
24 receptor transcription factor that regulates steroidogenesis genes (VAL *et al.* 2003). Our in situ  
25 hybridization results compared to histological phenotypes paint a picture of disrupted development  
26 stemming from *amh*-expressing granulosa and Sertoli in zebrafish *amh* mutants that leads to  
27 disordered organization of these helper cells, their failure to support sex steroid output of theca  
28 and Leydig cells, followed by failure of proper germ cell maturation and inhibition of germ cell  
29 proliferation.

30 Genome-wide transcriptional analyses further provided an unbiased probe of the mechanisms of  
31 normal gonad development and the roles of Amh. A comparison of wild-type ovary to wild-type  
32 testis identified hundreds of genes with previously unknown functions, many of which are lineage-  
33 specific, with strong differential expression. These genes likely encode egg shell and sperm  
34 components. These data provide, for the first time, information related to function for many genes  
35 known previously only by sequence.

36 Principal component analysis showed that the transcriptomes of adult *amh* mutant ovaries were  
37 shifted in the direction of wild-type testis transcriptomes and mutant adult testis transcriptomes  
38 were shifted in the direction of wild-type ovary transcriptomes. This result likely reflects the  
39 depressed ability of *amh* mutant ovaries to convert testosterone to estrogen and the observed  
40 retention of immature oocytes in adult *amh* mutant testes.

41 Analysis of the transcriptomes of gonad-containing trunks of juveniles provided important  
42 insights into both normal zebrafish sex determination and the roles of Amh in gonad development  
43 and physiology. At 21dpf, laboratory strain zebrafish have morphologically undifferentiated gonads  
44 (TAKAHASHI 1977; MAACK 2003; RODRIGUEZ-MARI *et al.* 2005; WANG *et al.* 2007), so it was a

45 surprise to find that unsupervised transcriptome similarity clustering divided late larvae into two  
46 distinct groups. Each of these two groups contained both *amh* mutants and wild types, showing  
47 that factors other than *amh* function distinguish these two groups. Differential expression analysis  
48 showed that one group over-expressed ovary genes and the other over-expressed genes that  
49 were also over-expressed in wild-type testes vs. wild-type ovaries, although few of these genes  
50 had previously been recognized as testis marker genes. We conclude that, despite little  
51 morphological differentiation in 21dpf gonads, they had already embarked on a female or male  
52 developmental program. This is the first report of the genome-wide transcriptional differentiation of  
53 zebrafish gonads at such an early age.

54 The small number of genes (16) that were differentially up-regulated in *amh* mutant trunks vs.  
55 wild-type trunks at 21dpf included regulators of steroidogenesis and meiosis. Two up-regulated  
56 genes in mutants affect development or function of steroid-producing Leydig cells: *nr0b2*, which  
57 inhibits steroidogenic gene expression in mouse Leydig cells (VOLLE *et al.* 2007), and *ptch2*, part of  
58 a receptor complex for desert hedgehog signaling in Leydig cells (YAO *et al.* 2002; WIJGERDE *et al.*  
59 2005; HERPIN *et al.* 2013). *Amh* also likely helps regulate the initiation of meiosis. *Nr0b2* in mouse  
60 reduces the level of retinoic acid, thereby reducing the expression of genes essential for mitotic  
61 germ cells to enter meiosis (VOLLE *et al.* 2007) and we found that *nr0b2* was the most up-regulated  
62 gene in 21dpf *amh* mutants. Late larval zebrafish *amh* mutants also up-regulated the Leydig cell  
63 marker gene *cyp26a1*, which encodes an enzyme that degrades retinoic acid, the regulator of  
64 entry into meiosis. We conclude that *Amh* from Sertoli cells is required for normal Leydig cell  
65 development and function and likely helps regulate the timing of meiosis as early as 21dpf.

66 Transcriptomes of 35dpf trunks also separated samples into two groups, each of which  
67 contained both mutants and wild types. Within each group, mutants separated from wild types,  
68 showing that between 21dpf and 35dpf, *amh* had begun to exert a significant effect on gonad  
69 development. One group evidently had significant levels of estrogen because they were strongly

70 expressing estrogen-induced vitellogenin genes, and in addition they strongly expressed zona  
71 pellucida egg shell genes. The other group over-expressed a number of testis-specific genes  
72 including *amh* and *dmrt1* as well as genes not previously recognized as testis genes but over-  
73 expressed in wild type testis vs. wild-type ovary, thus providing novel insight into potential  
74 functions of these genes previously known only by sequence. Expression levels of genes in  
75 putatively male 35dpf animals were strongly correlated to their levels in the not-female 21dpf  
76 group, confirming that some late larval fish had already begun to initiate a male developmental  
77 pathway. GO enrichment terms between putative males and putative females in 35dpf juveniles  
78 changed from a focus on germ cell functions like piRNAs and egg-shell genes at 21dpd to an  
79 emphasis on cell cycle and DNA-repair genes at 35dpf, consistent with more cells undergoing  
80 meiosis.

81 A comparison of *amh* mutant juveniles to wild-type juveniles showed that numerous immune-  
82 related genes were up-regulated in mutants. These genes included interferon regulatory factor-7  
83 (*irf7*), which is a paralog of the trout master sex-determining gene *sdY* that has been shown to be a  
84 duplicated, truncated interferon regulatory factor 9 (*irf9*) (YANO *et al.* 2012). The up-regulation of  
85 immune-related genes might reflect an inflammatory response to cell damage that accompanies  
86 the disruption of the development of Leydig cells and granulosa cells observed in histological  
87 sections and reflected in our *in situ* hybridization and transcriptome studies.

88 Transcriptomes of adult *amh* mutant testes differed substantially from those of adult wild-type  
89 testes. First, mutant testes up-regulated several genes that were greatly over-expressed in wild-  
90 type ovaries, likely reflecting the oocytes that histological sections revealed in *amh* mutant testes.  
91 These results show that Amh acts to block oocyte development in zebrafish testes. Second, adult  
92 *amh* mutant testes under-expressed most Leydig cell marker genes, consistent with our histology  
93 results and the finding that mouse *Amh* mutant males have disrupted Leydig cell development  
94 (BEHRINGER *et al.* 1994). In contrast to the strongly altered Leydig cell markers in *amh* mutant

95 transcriptomes, Sertoli cell marker genes were not strongly altered in *amh* mutants. We conclude  
96 that, although Amh is produced by and secreted from Sertoli cells, the lack of Amh function alters  
97 the developmental activities of Leydig cells, a conserved feature of Amh function. Thus, Leydig  
98 cells must express a receptor for Amh even though zebrafish lacks an ortholog of Amhr2, which  
99 helps form the Amh receptor in mammals and most fish. Third, *amh* mutant testes under-  
00 expressed testis-biased genes, consistent with the finding of ovotestes in *amh* mutants. Fourth,  
01 Despite *amh* mutant males accumulating substantial quantities of testis lobules, they greatly under-  
02 expressed genes involved in the production of mature sperm, verifying histology. The enormous  
03 testes in zebrafish *amh* mutants are consistent with zebrafish organ culture experiments that  
04 showed that Amh inhibits androgen-stimulated proliferation of spermatogonia (SKAAR *et al.* 2011),  
05 thus, with less Amh, the inhibition should lessen, resulting in the accumulation of spermatogonia  
06 we observed. Together, our findings show that Amh signaling is required for normal development  
07 of Leydig cells, for the disappearance of ovotestes, for accelerating sperm maturation, and for the  
08 inhibition of spermatocyte proliferation.

09 Transcriptome analyses and in situ hybridization studies showed differences between adult  
10 ovaries in *amh* mutants and wild types, including the under-expression of marker genes for both  
11 granulosa cells and theca cells. In contrast, many oocyte marker genes were not differentially  
12 expressed, which is a bit surprising given the mis-expression of many of these genes in the  
13 putatively female groups (Groups21-1 and 35-1) in late larval and juvenile zebrafish. On the other  
14 hand, *amh* adult mutant ovaries over-expressed many genes involved in translation, as expected  
15 from the massive accumulation of young oocytes in mutant ovaries, and they under-expressed  
16 some ovary regulatory genes like *foxl2a*, *cyp19a1a*, and *gata4*, reflecting the loss of control of  
17 oocyte proliferation.

18 In tetrapods and most teleosts, Amh receptor type II (Amhr2) is expressed in both Leydig and  
19 Sertoli cells (RACINE C *et al.* 199; DI CLEMENTE N *et al.* 1994) and it mediates Amh signaling.

20 Reference genomes of zebrafish and as we show, other cyprinids, however, have no ortholog of  
21 *Amhr2*, and gene loss is associated with a chromosome break at the ancestral site of the gene,  
22 thus, *Amhr2* function is likely performed by another *Bmpr2* paralog. In zebrafish, *bmpr2a* is over-  
23 expressed in adult wild-type testis vs. wild-type ovary and both *bmpr2a* and *bmpr2b* are under-  
24 expressed in *amh* mutant ovary vs. wild-type ovary, making these genes candidates for the elusive  
25 *Amh* receptor.

26

27

### ACKNOWLEDGEMENTS

28 We thank the University of Oregon Genomics & Cell Characterization Core Facility (Doug  
29 Turnbull and Maggie Weitzman) for their wonderful expertise, Clay Small for comments on the  
30 manuscript, and the NIH for support by grants R01 GM-085318 (J.H.P.), and IOS-1456737  
31 (B.W.D.).

32

33

### FIGURE LEGENDS.

34 Figure 1. CRISPR/Cas9-induced *amh* mutants. A. 14kb of the *amh* locus showing two CRISPR  
35 target sites (red letters) in exon-3. PCR primers, forward (F) and reverse (R) (green). B. Assay for  
36 injected CRISPR efficacy. PCR analysis of four G0 injected embryos at 1dpf using genotyping  
37 primers F and R shows a 319 base pair (bp) fragment in wild types (WT) that digested with  
38 *HpyCH4IV* to produce fragments of 172bp and 147bp; this site disappeared from *amh* genes in a  
39 large portion of cells in CRISPR-injected embryos. Abbreviations: M, length marker; un, uninjected  
40 24hpf embryos; i1-i4, CRISPR-injected 24hpf embryos. C. Sequence traces from genomic DNA  
41 from a wild-type fish and from three stable mutant lines carrying -5 bp, -10 bp and -26 bp deletions.  
42 D. Sequences of genomic DNAs from a wild-type (WT) fish and three stable mutant lines (Mut). E.  
43 Predicted structure of *Amh* protein showing the location of the mutation (triangle), the predicted out-



44 of-frame portion (red), and the premature stop codon (\*). Protein coding domains: signal peptide,  
45 purple; Amh amino-terminal domain, salmon; cleavage site, green arrow; mature Amh peptide, blue.

46 Figure 2. Fertility tests for adult *amh* mutants and wild types. (A) Average number of eggs laid per  
47 cross from wild-type females crossed to wild-type males (11 crosses), *amh*<sup>-26</sup> mutant females  
48 crossed to wild-type males (11 crosses), and wild-type females crossed to *amh*<sup>-26</sup> mutant males (4  
49 crosses) at 4.5mpf. (B) Average number of eggs laid per cross from wild-type females crossed to  
50 wild-type males (8 crosses), *amh*<sup>-26</sup> mutant females crossed to wild-type males (7 crosses), and  
51 wild-type females crossed to *amh*<sup>-26</sup> mutant males (6 crosses) at 11mpf. For each cross, one  
52 individual female (either mutant or wild-type sibling) was paired with three non-sibling wild-type  
53 males, or for the reciprocal test, one individual male (either mutant or wild-type sibling) was paired  
54 with three non-sibling wild-type females. Eggs were collected and counted at 1dpf and 3dpf;  
55 embryos were scored as developing normally (white bars), or as not developing or improperly  
56 developing (black bars). Statistical significance: \*, 0.05<p<0.01; \*\*, 0.01<p<0.001 and \*\*\*, p< 0.001,  
57 Wilcoxon Rank Sum Test. Error bars: standard deviation. Abbreviations: F, female; M, male; WT,  
58 wild type; Mut, mutant.

59 Figure 3. Gonad histology of 21dpf and 35dpf wild-type and *amh*-mutant fish. A-D. In histological  
60 sections, gonads in all eight 21dpf wild-type sibling fish (WT) contained early oocytes (one gonad  
61 shown in each of two individuals in A and B). Gonads in six of eight 21dpf *amh*<sup>-26</sup> mutants were  
62 morphologically like wild-type ovaries (C) and gonads of two of eight 21dpf *amh*<sup>-26</sup> mutants were  
63 undifferentiated (D). At 35dpf, wild-type fish contained gonads that were clearly either ovaries (4/8  
64 fish) (E) or testis (4/8 fish) (F). In 35dpf *amh*<sup>-26</sup> mutants, most fish had ovaries (7/8 fish) (G) but one  
65 of eight fish had immature testis (H). Smaller boxed regions in several panels are magnified in the  
66 larger boxed regions at the right of these panels. Scale bar in E is 100µm for all panels; scale bar in  
67 the higher magnification boxes in A: 50 µm.

69 Figure 4. *Amh* activity is required for normal gonad morphology in adult zebrafish. (A-D) 8mpf adult  
70 zebrafish: wild types (A, female, 6 fish sectioned; C, male, 7 fish) and *amh*<sup>-26</sup> mutants (B, female, 6  
71 fish; D, male, 7 fish), showing enlarged abdomens in mutants. (E-T) Histological sections of 8mpf  
72 adult gonads: Adult female ovaries at low (E, F), and high (I, J) magnification. Cross-sections of an  
73 8mpf wild-type female sibling (E, I) revealed maturing (stage-I and -II) and vitellogenic (stage-III  
74 and -IV) follicles. Cross-sections of an 8mpf *amh* mutant female (F, J) showed an excess of  
75 immature follicles (stage-I and -II), a few early vitellogenic follicles (stage-III), but no late  
76 vitellogenic follicles (stage-IV) (Numbers of oocytes per stage shown in panel W). Panels M-T  
77 illustrate some of the variation in mutant phenotypes, (M, Q) Low and high magnification of  
78 dissected wild-type testis. (N, R) Medium and high magnification of a cross section of the abdomen  
79 of a different wild-type male. (O, S) Low and high magnification of dissected ovotestis from an *amh*<sup>-</sup>  
80 <sup>26</sup> mutant male showing immature oocytes in the testis. (P, T) Medium and high magnification of  
81 the abdomen of a different *amh*<sup>-26</sup> mutant male showing small testis lobules and fewer late stage  
82 male gonocytes compared to wild types. Gonadal somatic index (GSI) of adult females (U) and  
83 males (V). GSI calculations for females used five wild-type siblings of *amh*<sup>-10</sup> females, five *amh*<sup>-10</sup>  
84 mutant females, five wild-type siblings of *amh*<sup>-26</sup> mutant females, and five *amh*<sup>-26</sup> mutant females.  
85 GSI calculations for males used five wild-type siblings of *amh*<sup>-10</sup> males, five *amh*<sup>-10</sup> mutant males,  
86 eight wild-type siblings of *amh*<sup>-26</sup> mutant males, and five *amh*<sup>-26</sup> mutant males. (W) Number of  
87 oocytes per stage at 4.5, 8, and 18mpf. Oocytes were categorized into three groups: stage I +  
88 stage II (beige), stage III (red), and stage IV (green) oocytes in W. The 18mpf mutant females had  
89 mostly stage I + stage II oocytes (W). Statistical significance: \*\*, 0.01<p<0.001 and \*\*\*, p< 0.001;  
90 Wilcoxon Rank Sum Test). In (U) and (W), solid boxes, wild-types; striped boxes, mutants; red  
91 boxes, females; blue boxes, males. Abbreviations: I, II, III, IV: ovarian follicle stages 1 to 4; o,  
92 ovary; s, Sertoli cells; sc, spermatocytes; sg, spermatogonia; sz, spermatozoa; t, testis. Black scale  
93 bar in E for E and F; black scale bar in G for G and H; white scale bar in I for I and J; white scale

94 bar in K for K and L. All scale bars: 100 $\mu$ m. (U, V and W) Gonadosomatic index (GSI) in percent.  
95 (U): wild types (WT) and *amh* mutant (Mut) ovary. (V) wild types (WT) and *amh* mutant (Mut) testis.

96

97 Figure 5. Gene expression patterns in adult gonads at 8mpf. Wild-type ovaries (A, C, E, G, I, K,  
98 M, O, R, T); *amh*<sup>-26</sup> mutant ovaries (A', C', E', G', I', K', M', O', R' T'); wild-type testis (B, D, F, H, J,  
99 L, N, P, S, U); *amh* mutant testis (B', D', F', H', J', L', N', P', S', U'). *In situ* hybridization for *amh* (A,  
00 A', B, B'), *bmp15* (C, C', D, D'), *gdf9* (E, E', F, F'), *gsdf* (G, G', H, H'), *cyp19a1a* (I, I', J, J'), *gata4*  
01 (K, K', L, L'), *bmpr2a* (M, M', N, N'), *bmpr2b* (O, O', P, P'), *nr5a1a* (R, R', S, S'), *vasa* (T, T', U, U').

02 Small boxed regions in low magnification views are shown in larger boxed regions at higher

03 magnification for B, B', E, E', G, I, I', K, K', M, M', O, O', R, R', M, M'. Scale bars for main panels

04 represent 100 $\mu$ m; scale bars for higher magnification in boxed regions represent 25 $\mu$ m.

05 Abbreviations: I, II, III, IV: ovarian follicle stages 1 to 4.

06 Figure 6. Heat map and dendrogram of rlog-transformed Euclidean distances between all 45  
07 RNA-seq samples. Analysis divided samples into six groups: adult ovary, adult testes, two groups  
08 of 35dpf trunks, and two groups of 21dpf trunks. The intensity of each cell in the panel reflects the  
09 number of genes different in the intersecting two samples according to the scale at the left, so the  
10 diagonal self-comparisons show no genes differently expressed.

11 Figure 7. Principal Component Analyses (PCA). DESeq2-generated rlogs of the 500 most  
12 variable genes of (A) adult ovary and testes samples, (B) 21dpf samples, and (C) 35dpf samples.

13 Supplemental Figure S1. Mutant phenotypes for *amh*;*gsdf* double mutants. Cross-sections of  
14 gonads from one-year old adults. (A-D) Wild type (WT); (E-H) *amh*<sup>-26</sup> mutants; (I-L) *gsdf*<sup>-8</sup> mutants;  
15 (M-P) *amh*<sup>-26</sup>;*gsdf*<sup>-8</sup> double mutants. (A, E, I, M) Ovary at low magnification. (B, F, J, N) High  
16 magnification of the boxed regions in A, E, I, M. (C, G, K, O) Testis at low magnification. (D, H, L,  
17 P) High magnification of the boxed regions in C, G, K, O. Abbreviations: I, II, III, IV: ovarian follicle

18 stages 1 to 4; o, ovary; sc, spermatocytes; sz, spermatozoa; t, testis. Black scale bar in M for A, E,  
19 I and M; white scale bar in N for B, F, J and N; black scale bar in O for C, G, K and O; black scale  
20 bar in P for D, H, L and L. All scale bars: 100µm.

21 Supplemental Figure S2. Conserved syntenies and loss of the zebrafish *amhr2* gene. A. A  
22 portion of chromosome 22 (Ame22) from the cavefish *Astyanax mexicanum* containing *amhr2*. B.  
23 Three portions of zebrafish chromosome 11 (Dre11) containing regions with conserved synteny to  
24 the *amhr2*-containing portion of the cavefish genome showing that the breakpoint of a  
25 chromosome rearrangement lies at the predicted location of *amhr2*. The portion of the figure above  
26 part A shows that paralogs of the zebrafish genome from Dre22 and Dre2 contain ohnologs  
27 derived from the teleost genome duplication and also lack *amhr2*. C. The three regions of the  
28 zebrafish genome shown in in part B occupy different positions along the entire chromosome  
29 Dre11. D. Portions of the common carp (*Cyprinus carpio*) genome on two parts of Cca22 with  
30 orthology to the *amhr2*-containing part of cavefish, which are broken at the expected site of the  
31 *amhr2* gene as in zebrafish. E. Positions of regions shown in part D on chromosome Cca22. F.  
32 The duplicated region from the carp genome duplication event co-orthologous to zebrafish  
33 chromosome Dre11. G. Positions of regions shown in part F on chromosome Cca22. Results show  
34 that *amhr2* loss occurred associated with a chromosome rearrangement breakpoint that is a  
35 shared feature of cypriniforms that occurred after cypriniform otophysans diverged from  
36 characiform and siluriform otophysans.

37 Supplemental Figure S3. Gonadal phenotypes of the *amh<sup>uc28</sup>* allele visualized in hematoxylin  
38 and eosin stained histological sections of 6mpf animals. A. Wild-type (WT) female. B. *amh<sup>uc28</sup>*  
39 mutant female. C. Wild-type male. D. *amh<sup>uc28</sup>* mutant male. Abbreviations: O, ovary; T, testis.  
40 Scale bar: 1mm.

41 **REFERENCES**

42

43

- 44 Adolfi, M. C., A. Herpin, M. Regensburger, J. Sacquegno, J. S. Waxman *et al.*, 2016 Retinoic acid and  
45 meiosis induction in adult versus embryonic gonads of medaka. *Sci Rep* 6: 34281.
- 46 Adolfi, M. C., R. T. Nakajima, R. H. Nobrega and M. Scharl, 2018 Intersex, Hermaphroditism, and Gonadal  
47 Plasticity in Vertebrates: Evolution of the Mullerian Duct and Amh/Amhr2 Signaling. *Annu Rev Anim*  
48 *Biosci.*
- 49 Amores, A., J. Catchen, A. Ferrara, Q. Fontenot and J. H. Postlethwait, 2011 Genome evolution and meiotic  
50 maps by massively parallel DNA sequencing: spotted gar, an outgroup for the teleost genome  
51 duplication. *Genetics* 188: 799-808.
- 52 Anders, S., P. T. Pyl and W. Huber, 2015 HTSeq--a Python framework to work with high-throughput  
53 sequencing data. *Bioinformatics* 31: 166-169.
- 54 Applegate, V. C., 1948 Sea lamprey investigations. 2. Egg development, maturity, egg production, and  
55 percentage of unspawned eggs of sea lampreys, *Petromyzon marinus*, captured in several Lake  
56 Huron tributaries. Michigan Department of Natural Resources, Fisheries Division Reports 1161: 1-  
57 28.
- 58 Barbaro, M., M. Oscarson, J. Schoumans, J. Staaf, S. A. Ivarsson *et al.*, 2007 Isolated 46,XY gonadal  
59 dysgenesis in two sisters caused by a Xp21.2 interstitial duplication containing the DAX1 gene. *J*  
60 *Clin Endocrinol Metab* 92: 3305-3313.
- 61 Behringer, R. R., M. J. Finegold and R. L. Cate, 1994 Mullerian-inhibiting substance function during  
62 mammalian sexual development. *Cell* 79: 415-425.
- 63 Bolger, A., M. Lohse and B. Usadel, 2014 Trimmomatic: a flexible trimmer for Illumina sequence data.  
64 *Bioinformatics* 30: 2114-2120.
- 65 Carlsson, I. B., J. E. Scott, J. A. Visser, O. Ritvos, A. P. Themmen *et al.*, 2006 Anti-Mullerian hormone  
66 inhibits initiation of growth of human primordial ovarian follicles in vitro. *Hum Reprod* 21: 2223-2227.
- 67 Catchen, J. M., J. S. Conery and J. H. Postlethwait, 2009 Automated identification of conserved synteny  
68 after whole-genome duplication. *Genome Res* 19: 1497-1505.
- 69 Chen, S., H. Zhang, F. Wang, W. Zhang and G. Peng, 2016 nr0b1 (DAX1) mutation in zebrafish causes  
70 female-to-male sex reversal through abnormal gonadal proliferation and differentiation. *Mol Cell*  
71 *Endocrinol* 433: 105-116.
- 72 Chen, W., L. Liu and W. Ge, 2017 Expression analysis of growth differentiation factor 9 (Gdf9/gdf9), anti-  
73 mullerian hormone (Amh/amh) and aromatase (Cyp19a1a/cyp19a1a) during gonadal differentiation  
74 of the zebrafish, *Danio rerio*. *Biol Reprod* 96: 401-413.
- 75 Chiang, E. F., Y. L. Yan, Y. Guiguen, J. Postlethwait and B. Chung, 2001a Two Cyp19 (P450 aromatase)  
76 genes on duplicated zebrafish chromosomes are expressed in ovary or brain. *Mol Biol Evol* 18: 542-  
77 550.
- 78 Chiang, E. F., Y. L. Yan, S. K. Tong, P. H. Hsiao, Y. Guiguen *et al.*, 2001b Characterization of duplicated  
79 zebrafish cyp19 genes. *J Exp Zool* 290: 709-714.
- 80 Clelland, E., G. Kohli, R. K. Campbell, S. Sharma, S. Shimasaki *et al.*, 2006 Bone morphogenetic protein-15  
81 in the zebrafish ovary: complementary deoxyribonucleic acid cloning, genomic organization, tissue  
82 distribution, and role in oocyte maturation. *Endocrinology* 147: 201-209.
- 83 Clelland, E. S., and S. P. Kelly, 2011 Exogenous GDF9 but not Activin A, BMP15 or TGFbeta alters tight  
84 junction protein transcript abundance in zebrafish ovarian follicles. *Gen Comp Endocrinol* 171: 211-  
85 217.

- 86 Dahlem TJ, K. Hoshijima, M. Jury nec, D. Gunther, C. Starker *et al.*, 2012 Simple methods for generating  
87 and detecting locus-specific mutations induced with TALENs in the zebrafish genome. *PLoS Genet*  
88 8: e1002861.
- 89 di Clemente N , Wilson C , Faure E , Boussin L , Carmillo P *et al.*, 1994 Cloning, expression, and  
90 alternative splicing of the receptor for anti-Müllerian hormone. *Mol Endocrinol* 8: 1006–1020.
- 91 Diamanti-Kandarakis, E., 2008 Polycystic ovarian syndrome: pathophysiology, molecular aspects and  
92 clinical implications. *Expert Rev Mol Med* 10: e3.
- 93 Dranow, D. B., K. Hu, A. M. Bird, S. T. Lawry, M. T. Adams *et al.*, 2016 Bmp15 Is an Oocyte-Produced  
94 Signal Required for Maintenance of the Adult Female Sexual Phenotype in Zebrafish. *PLoS Genet*  
95 12: e1006323.
- 96 Durlinger, A. L., P. Kramer, B. Karels, F. H. de Jong, J. T. Uilenbroek *et al.*, 1999 Control of primordial  
97 follicle recruitment by anti-Mullerian hormone in the mouse ovary. *Endocrinology* 140: 5789-5796.
- 98 Elger, W., 1966 Die rolle der fetalen Androgene in der Sexualdifferenzierung des Kaninchens und ihre  
99 Abgrenzung gene andere Hormonale und somatische Faktoren durch Anwendung eines starken  
00 Antiandrogens. *Archives d'anatomie microscopique et de morphologie experimentale* 55: Suppl 657-  
01 743.
- 02 Fagerberg, L., B. M. Hallstrom, P. Oksvold, C. Kampf, D. Djureinovic *et al.*, 2014 Analysis of the human  
03 tissue-specific expression by genome-wide integration of transcriptomics and antibody-based  
04 proteomics. *Mol Cell Proteomics* 13: 397-406.
- 05 Fechner, S., L. Alvarez, W. Bonigk, A. Muller, T. K. Berger *et al.*, 2015 A K(+)-selective CNG channel  
06 orchestrates Ca(2+) signalling in zebrafish sperm. *Elife* 4.
- 07 Ferrara, A. M., and E. R. Irwin, 2001 A Standardized Procedure for Internal Sex Identification in  
08 Lepisosteidae. *North American Journal of Fisheries Management* 21: 956-961.
- 09 Force, A., M. Lynch, F. B. Pickett, A. Amores, Y. L. Yan *et al.*, 1999 Preservation of duplicate genes by  
10 complementary, degenerative mutations. *Genetics* 151: 1531-1545.
- 11 Gautier, A., F. Le Gac and J. J. Lareyre, 2011a The *gsdf* gene locus harbors evolutionary conserved and  
12 clustered genes preferentially expressed in fish previtellogenic oocytes. *Gene* 472: 7-17.
- 13 Gautier, A., F. Sohm, J. S. Joly, F. Le Gac and J. J. Lareyre, 2011b The proximal promoter region of the  
14 zebrafish *gsdf* gene is sufficient to mimic the spatio-temporal expression pattern of the endogenous  
15 gene in Sertoli and granulosa cells. *Biol Reprod* 85: 1240-1251.
- 16 Groh, K. J., R. Schonenberger, R. I. Eggen, H. Segner and M. J. Suter, 2013 Analysis of protein expression  
17 in zebrafish during gonad differentiation by targeted proteomics. *Gen Comp Endocrinol* 193: 210-  
18 220.
- 19 Hardisty, M. W., 1971 Gonadogenesis, sex differentiation and gametogenesis, pp. 295-359 in *The Biology*  
20 *of Lampreys*, edited by M. W. Hardisty and I. C. Potter. Academic Press, London.
- 21 Hattori, R. S., Y. Murai, M. Oura, S. Masuda, S. K. Majhi *et al.*, 2012 A Y-linked anti-Mullerian hormone  
22 duplication takes over a critical role in sex determination. *Proc Natl Acad Sci U S A* 109: 2955-2959.
- 23 Hatzirodos, N., K. Hummitzsch, H. F. Irving-Rodgers and R. J. Rodgers, 2015 Transcriptome comparisons  
24 identify new cell markers for theca interna and granulosa cells from small and large antral ovarian  
25 follicles. *PLoS One* 10: e0119800.
- 26 Herpin, A., M. C. Adolphi, B. Nicol, M. Hinzmann, C. Schmidt *et al.*, 2013 Divergent expression regulation of  
27 gonad development genes in medaka shows incomplete conservation of the downstream regulatory  
28 network of vertebrate sex determination. *Mol Biol Evol* 30: 2328-2346.
- 29 Howley, C., and R. K. Ho, 2000 mRNA localization patterns in zebrafish oocytes. *Mechanisms of*  
30 *Development* 92: 305-309.
- 31 Hugo, S. E., L. Cruz-Garcia, S. Karanth, R. M. Anderson, D. Y. Stainier *et al.*, 2012 A monocarboxylate  
32 transporter required for hepatocyte secretion of ketone bodies during fasting. *Genes and*  
33 *Development* 26: 282-293.

- 34 Ieda, R., S. Hosoya, S. Tajima, K. Atsumi, T. Kamiya *et al.*, 2018 Identification of the sex-determining locus  
35 in grass puffer (*Takifugu niphobles*) provides evidence for sex-chromosome turnover in a subset of  
36 *Takifugu* species. *PLoS One* 13: e0190635.
- 37 Imai, T., K. Saino and M. Matsuda, 2015 Mutation of Gonadal soma-derived factor induces medaka XY  
38 gonads to undergo ovarian development. *Biochem Biophys Res Commun* 467: 109-114.
- 39 Imbeaud, S., C. Belville, L. Messika-Zeitoun, R. Rey, N. di Clemente *et al.*, 1996 A 27 base-pair deletion of  
40 the anti-mullerian type II receptor gene is the most common cause of the persistent mullerian duct  
41 syndrome. *Hum Mol Genet* 5: 1269-1277.
- 42 Iyer, A. K., Y. H. Zhang and E. R. McCabe, 2006 Dosage-sensitive sex reversal adrenal hypoplasia  
43 congenita critical region on the X chromosome, gene 1 (DAX1) (NR0B1) and small heterodimer  
44 partner (SHP) (NR0B2) form homodimers individually, as well as DAX1-SHP heterodimers. *Mol*  
45 *Endocrinol* 20: 2326-2342.
- 46 Josso, N., 1972 Permeability of membranes to the Mullerian-inhibiting substance synthesized by the human  
47 fetal testis in vitro: a clue to its biochemical nature. *J Clin Endocrinol Metab* 34: 265-270.
- 48 Jost, A., 1947 Recherches sur la différenciation sexuelle de l'embryon de lapin. . *Archs Anat. Microsc.*  
49 *Morph Exp.* 36: 271–315.
- 50 Kamiya, T., W. Kai, S. Tasumi, A. Oka, T. Matsunaga *et al.*, 2012 A trans-species missense SNP in *Amhr2*  
51 is associated with sex determination in the tiger pufferfish, *Takifugu rubripes* (*fugu*). *PLoS Genet* 8:  
52 e1002798.
- 53 Kossack, M. E., S. K. High, R. E. Hopton, Y. L. Yan, J. H. Postlethwait *et al.*, 2019 Female Sex  
54 Development and Reproductive Duct Formation Depend on *Wnt4a* in Zebrafish. *Genetics* 211: 219-  
55 233.
- 56 Koubova, J., D. B. Menke, Q. Zhou, B. Capel, M. D. Griswold *et al.*, 2006 Retinoic acid regulates sex-  
57 specific timing of meiotic initiation in mice. *Proc Natl Acad Sci U S A* 103: 2474-2479.
- 58 Lee, S. L. J., J. A. Horsfield, M. A. Black, K. Rutherford, A. Fisher *et al.*, 2017 Histological and  
59 transcriptomic effects of 17alpha-methyltestosterone on zebrafish gonad development. *BMC*  
60 *Genomics* 18: 557.
- 61 Li, C. W., and W. Ge, 2011 Spatiotemporal expression of bone morphogenetic protein family ligands and  
62 receptors in the zebrafish ovary: a potential paracrine-signaling mechanism for oocyte-follicle cell  
63 communication. *Biol Reprod* 85: 977-986.
- 64 Li, M., Y. Sun, J. Zhao, H. Shi, S. Zeng *et al.*, 2015 A Tandem Duplicate of Anti-Mullerian Hormone with a  
65 Missense SNP on the Y Chromosome Is Essential for Male Sex Determination in Nile Tilapia,  
66 *Oreochromis niloticus*. *PLoS Genet* 11: e1005678.
- 67 Li S1, Lu MM, Zhou D, Hammes SR and M. EE., 2007 GLP-1: a novel zinc finger protein required in  
68 somatic cells of the gonad for germ cell development. *Dev Biol.* 301: 106-116.
- 69 Liang, L., S. M. Soyal and J. Dean, 1997 FIGalpha, a germ cell specific transcription factor involved in the  
70 coordinate expression of the zona pellucida genes. *Development* 124: 4939-4947.
- 71 Lin, Q., J. Mei, Z. Li, X. Zhang, L. Zhou *et al.*, 2017 Distinct and Cooperative Roles of *amh* and *dmt1* in  
72 Self-Renewal and Differentiation of Male Germ Cells in Zebrafish. *Genetics* 207: 1007-1022.
- 73 Liu, L., and W. Ge, 2007 Growth differentiation factor 9 and its spatiotemporal expression and regulation in  
74 the zebrafish ovary. *Biol Reprod* 76: 294-302.
- 75 Liu, X., H. Wang and Z. Gong, 2006 Tandem-repeated Zebrafish *zp3* genes possess oocyte-specific  
76 promoters and are insensitive to estrogen induction. *Biol Reprod* 74: 1016-1025.
- 77 Lourenco, D., R. Brauner, M. Rybczynska, C. Nihoul-Fekete, K. McElreavey *et al.*, 2011 Loss-of-function  
78 mutation in *GATA4* causes anomalies of human testicular development. *Proc Natl Acad Sci U S A*  
79 108: 1597-1602.
- 80 Love, M. I., S. Anders, V. Kim and W. Huber, 2015 RNA-Seq workflow: gene-level exploratory analysis and  
81 differential expression. *F1000Res* 4: 1070.

- 82 Maack, G. a. S., H., 2003 Morphological development of the gonads in zebrafish. *Journal of Fish Biology*  
83 62: 895–906.
- 84 Martin, M., 2011 Cutadapt removes adapter sequences from high-throughput sequencing reads. *EMBnet*  
85 17: 1-10.
- 86 Mi, H., A. Muruganujan and P. D. Thomas, 2013 PANTHER in 2013: modeling the evolution of gene  
87 function, and other gene attributes, in the context of phylogenetic trees.  
88 *Nucleic Acids Res* 41: D377-386.
- 89 Miao, L., Y. Yuan, F. Cheng, J. Fang, F. Zhou *et al.*, 2017 Translation repression by maternal RNA binding  
90 protein Zar1 is essential for early oogenesis in zebrafish. *Development* 144: 128-138.
- 91 Mishina, Y., R. Rey, M. J. Finegold, M. M. Matzuk, N. Josso *et al.*, 1996 Genetic analysis of the Mullerian-  
92 inhibiting substance signal transduction pathway in mammalian sexual differentiation. *Genes Dev*  
93 10: 2577-2587.
- 94 Mold, D. E., A. E. Dinitz and D. R. Sambandan, 2009 Regulation of zebrafish zona pellucida gene activity in  
95 developing oocytes. *Biol Reprod* 81: 101-110.
- 96 Moore, R. K., F. Otsuka and S. Shimasaki, 2003 Molecular basis of bone morphogenetic protein-15  
97 signaling in granulosa cells. *J Biol Chem* 278: 304–310.
- 98 Morinaga, C., D. Saito, S. Nakamura, T. Sasaki, S. Asakawa *et al.*, 2007 The hotei mutation of medaka in  
99 the anti-Mullerian hormone receptor causes the dysregulation of germ cell and sexual development.  
00 *Proc Natl Acad Sci U S A* 104: 9691-9696.
- 01 Muller, K., C. Thisse, B. Thisse and E. Raz, 2002 Expression of a linker histone-like gene in the primordial  
02 germ cells in zebrafish. *Mech Dev* 117: 253-257.
- 03 Munsterberg, A., and R. Lovell-Badge, 1991 Expression of the mouse anti-mullerian hormone gene  
04 suggests a role in both male and female sexual differentiation. *Development* 113: 613-624.
- 05 Nair, S., F. Marlow, E. Abrams, L. Kapp, M. C. Mullins *et al.*, 2013 The chromosomal passenger protein  
06 birc5b organizes microfilaments and germ plasm in the zebrafish embryo. *PLoS Genetics* 9:  
07 e1003448.
- 08 Neumann, J. C., G. L. Chandler, V. A. Damoulis, N. J. Fustino, K. Lillard *et al.*, 2011 Mutation in the type IB  
09 bone morphogenetic protein receptor *Alk6b* impairs germ-cell differentiation and causes germ-cell  
10 tumors in zebrafish. *Proc Natl Acad Sci U S A* 108: 13153-13158.
- 11 Nguyen, N. T. T., P. Vincens, H. Roest Crolius and A. Louis, 2018 Genomicus 2018: karyotype evolutionary  
12 trees and on-the-fly synteny computing. *Nucleic Acids Res* 46: D816-D822.
- 13 Novel, P., M. A. Fernandez-Trujillo, J. B. Gallardo-Galvez, I. Cano, M. Manchado *et al.*, 2013 Two Mx genes  
14 identified in European sea bass (*Dicentrarchus labrax*) respond differently to VNNV infection. *Vet*  
15 *Immunol Immunopathol* 153: 240-248.
- 16 Onichtchouk, D., K. Aduroja, H. G. Belting, L. Gnugge and W. Driever, 2003 Transgene driving GFP  
17 expression from the promoter of the zona pellucida gene *zpc* is expressed in oocytes and provides  
18 an early marker for gonad differentiation in zebrafish. *Dev Dyn* 228: 393-404.
- 19 Orban, L., R. Sreenivasan and P. E. Olsson, 2009 Long and winding roads: testis differentiation in  
20 zebrafish. *Mol Cell Endocrinol* 312: 35-41.
- 21 Padua, M. B. F., S. C.; Jiang, T. Y.; Deborah A. Morse, D. A.; and Sergei G. Tevosian, S. G., 2014  
22 Simultaneous Gene Deletion of *Gata4* and *Gata6* Leads to Early Disruption of Follicular  
23 Development and Germ Cell Loss in the Murine Ovary. *Biology of Reproduction* 91: 1-10.
- 24 Pigny, P., E. Merlen, Y. Robert, C. Cortet-Rudelli, C. Decanter *et al.*, 2003 Elevated serum level of anti-  
25 mullerian hormone in patients with polycystic ovary syndrome: relationship to the ovarian follicle  
26 excess and to the follicular arrest. *J Clin Endocrinol Metab* 88: 5957-5962.
- 27 Pulkki, M. M., D. G. Mottershead, Pasternack A.H., P. Muggalla, H. Ludlow *et al.*, 2012 A covalently  
28 dimerized recombinant human bone morphogenetic protein-15 variant identifies bone



- 29 morphogenetic protein receptor type 1B as a key cell surface receptor on ovarian granulosa cells.  
30 *Endocrinology*: 1509-1518.
- 31 Racine C , Rey R , Forest MG , Louis F , Ferré A *et al.*, 199 Receptors for anti-müllerian hormone on  
32 Leydig cells are responsible for its effects on steroidogenesis and cell differentiation. *Proc Natl Acad*  
33 *Sci USA* 95: 594–599.
- 34 Ribas, L., D. Robledo, A. Gomez-Tato, A. Vinas, P. Martinez *et al.*, 2016 Comprehensive transcriptomic  
35 analysis of the process of gonadal sex differentiation in the turbot (*Scophthalmus maximus*). *Mol*  
36 *Cell Endocrinol* 422: 132-149.
- 37 Rocha, A., S. Zanuy and A. Gomez, 2016 Conserved Anti-Mullerian Hormone: Anti-Mullerian Hormone  
38 Type-2 Receptor Specific Interaction and Intracellular Signaling in Teleosts. *Biol Reprod* 94: 141.
- 39 Rodriguez-Mari, A., C. Canestro, R. A. BreMiller, J. M. Catchen, Y. L. Yan *et al.*, 2013 Retinoic acid  
40 metabolic genes, meiosis, and gonadal sex differentiation in zebrafish. *PLoS One* 8: e73951.
- 41 Rodriguez-Mari, A., C. Canestro, R. A. Bremiller, A. Nguyen-Johnson, K. Asakawa *et al.*, 2010 Sex reversal  
42 in zebrafish fancl mutants is caused by Tp53-mediated germ cell apoptosis. *PLoS Genet* 6:  
43 e1001034.
- 44 Rodriguez-Mari, A., Y. L. Yan, R. A. Bremiller, C. Wilson, C. Canestro *et al.*, 2005 Characterization and  
45 expression pattern of zebrafish Anti-Mullerian hormone (Amh) relative to sox9a, sox9b, and  
46 cyp19a1a, during gonad development. *Gene Expr Patterns* 5: 655-667.
- 47 Rondeau, E. B., C. V. Laurie, S. C. Johnson and B. F. Koop, 2016 A PCR assay detects a male-specific  
48 duplicated copy of Anti-Mullerian hormone (amh) in the lingcod (*Ophiodon elongatus*). *BMC Res*  
49 *Notes* 9: 230.
- 50 Rondeau, E. B., A. M. Messmer, D. S. Sanderson, S. G. Jantzen, K. R. von Schalburg *et al.*, 2013  
51 Genomics of sablefish (*Anoplopoma fimbria*): expressed genes, mitochondrial phylogeny, linkage  
52 map and identification of a putative sex gene. *BMC Genomics* 14: 452.
- 53 Rouiller-Fabre, V., S. Carmona, R. A. Merhi, R. Cate, R. Habert *et al.*, 1998 Effect of anti-Mullerian hormone  
54 on Sertoli and Leydig cell functions in fetal and immature rats. *Endocrinology* 139: 1213-1220.
- 55 Santos, E. M., G. C. Paull, K. J. Van Look, V. L. Workman, W. V. Holt *et al.*, 2007a Gonadal transcriptome  
56 responses and physiological consequences of exposure to oestrogen in breeding zebrafish (*Danio*  
57 *rerio*). *Aquatic toxicology* (Amsterdam, Netherlands). 83: 134-142.
- 58 Santos, E. M., V. L. Workman, G. C. Paull, A. L. Filby, K. J. Van Look *et al.*, 2007b Molecular basis of sex  
59 and reproductive status in breeding zebrafish. *Physiological Genomics* 30: 111-122.
- 60 Selman, K., R. A. Wallace, A. Sarka and X. Qi, 1993 Stages of Oocyte Development in the Zebrafish,  
61 *Brachydanio rerio*. *Stages of Oocyte Development in the Zebrafish,*  
62 *Brachydanio rerio* 218: 203-224.
- 63 Skaar, K. S., R. H. Nobrega, A. Magaraki, L. C. Olsen, R. W. Schulz *et al.*, 2011 Proteolytically activated,  
64 recombinant anti-mullerian hormone inhibits androgen secretion, proliferation, and differentiation of  
65 spermatogonia in adult zebrafish testis organ cultures. *Endocrinology* 152: 3527-3540.
- 66 Small, C. M., G. E. Carney, Q. Mo, M. Vannucci and A. G. Jones, 2009 A microarray analysis of sex- and  
67 gonad-biased gene expression in the zebrafish: evidence for masculinization of the transcriptome.  
68 *BMC Genomics* 10: 579.
- 69 Sreenivasan, R., M. Cai, R. Bartfai, X. Wang, A. Christoffels *et al.*, 2008 Transcriptomic analyses reveal  
70 novel genes with sexually dimorphic expression in the zebrafish gonad and brain. *PLoS One* 3:  
71 e1791.
- 72 Sreenivasan, R., J. Jiang, X. Wang, R. Bartfai, H. Y. Kwan *et al.*, 2014 Gonad differentiation in zebrafish is  
73 regulated by the canonical Wnt signaling pathway. *Biol Reprod* 90: 45.
- 74 Suzuki, A., and N. Shibata, 2004 Developmental process of genital ducts in the medaka, *Oryzias latipes*.  
75 *Zoolog Sci* 21: 397-406.

- 76 Sydes, j., P. Batzel, T. A. Titus and J. H. Postlethwait, 2019 Dupligänger: a reference genome-based, UMI-  
77 cognizant, 5'-trimming-aware PCR duplicate removal pipeline. (Version 0.97). , pp. in *Zenodo.*,  
78 edited by C. R. .
- 79 Takahashi, H., 1977 Juvenile Hermaphroditism in the Zebrafish, *Brachydanio rerio*. Bull. Fac. Fish.  
80 Hokkaido Univ. 28: 57-65.
- 81 teKronnie, G., H. Stroband, H. Schipper and J. Samallo, 1999 Zebrafish CTH1, a C3H zinc finger protein, is  
82 expressed in ovarian oocytes and embryos. *Development genes and evolution* 209: 443-446.
- 83 Tremblay, J. J., Robert. N. M., Robert S. and Viger, V., 2001 Modulation of endogenous GATA-4 activity  
84 reveals Its dual contribution to Müllerian Inhibiting Substance gene transcription in Sertoli Cells.  
85 *Molecular Endocrinology* 15: 1636–1650.
- 86 Tremblay, J. J., and R. S. Viger, 2001 Nuclear receptor Dax-1 represses the transcriptional cooperation  
87 between GATA-4 and SF-1 in Sertoli cells. *Biol Reprod* 64: 1191-1199.
- 88 Uhlen, M., L. Fagerberg, B. M. Hallstrom, C. Lindskog, P. Oksvold *et al.*, 2015 Proteomics. Tissue-based  
89 map of the human proteome. *Science* 347: 1260419.
- 90 Val, P., A. M. Lefrancois-Martinez, G. Veyssiere and A. Martinez, 2003 SF-1 a key player in the  
91 development and differentiation of steroidogenic tissues. *Nucl Recept* 1: 8.
- 92 Visser, J. A., F. H. de Jong, J. S. Laven and A. P. Themmen, 2006 Anti-Mullerian hormone: a new marker  
93 for ovarian function. *Reproduction* 131: 1-9.
- 94 Volle, D. H., R. Duggavathi, B. C. Magnier, S. M. Houten, C. L. Cummins *et al.*, 2007 The small heterodimer  
95 partner is a gonadal gatekeeper of sexual maturation in male mice. *Genes Dev.* 21: 305-315.
- 96 von Hofsten, J., A. Larsson and P. E. Olsson, 2005 Novel steroidogenic factor-1 homolog (ff1d) is  
97 coexpressed with anti-Mullerian hormone (AMH) in zebrafish. *Dev Dyn* 233: 595-604.
- 98 Wang, H., J. T. Tan, A. Emelyanov, V. Korzh and Z. Gong, 2005 Hepatic and extrahepatic expression of  
99 vitellogenin genes in the zebrafish, *Danio rerio*. *Gene* 356: 91-100.
- 00 Wang, H., Y. Teng, Y. Xie, B. Wang, Y. Leng *et al.*, 2013 Characterization of the carbonic anhydrases 15b  
01 expressed in PGCs during early zebrafish development. *Theriogenology* 79: 443-452.
- 02 Wang, P. Y., A. Protheroe, A. N. Clarkson, F. Imhoff, K. Koishi *et al.*, 2009 Mullerian inhibiting substance  
03 contributes to sex-linked biases in the brain and behavior. *Proc Natl Acad Sci U S A* 106: 7203-  
04 7208.
- 05 Wang, X. G., R. Bartfai, I. Sleptsova-Freidrich and L. Orban, 2007 The timing and extent of 'juvenile ovary'  
06 phase are highly variable during zebrafish testis differentiation. *J Fish Biol* 70: 33-44.
- 07 Wang, X. G., and L. Orban, 2007 Anti-Mullerian hormone and 11 beta-hydroxylase show reciprocal  
08 expression to that of aromatase in the transforming gonad of zebrafish males. *Dev Dyn* 236: 1329-  
09 1338.
- 10 Webster, K. A., U. Schach, A. Ordaz, J. S. Steinfeld, B. W. Draper *et al.*, 2017 *Dmrt1* is necessary for male  
11 sexual development in zebrafish. *Dev Biol* 422: 33-46.
- 12 Wijgerde, M., M. Ooms, J. W. Hoogerbrugge and J. A. Grootegoed, 2005 Hedgehog signaling in mouse  
13 ovary: Indian hedgehog and desert hedgehog from granulosa cells induce target gene expression in  
14 developing theca cells. *Endocrinology* 146: 3558-3566.
- 15 Wourms, J. P., 1977 Reproduction and Development in Chondrichthyan Fishes. *AMER. ZOOL.* 17: 379-  
16 410.
- 17 Wu, T. D., J. Reeder, M. Lawrence, G. Becker and M. J. Brauer, 2016 GMAP and GSNAP for Genomic  
18 Sequence Alignment: Enhancements to Speed, Accuracy, and Functionality. *Methods Mol Biol*  
19 1418: 283-334.
- 20 Yan, Y. L., T. Desvignes, R. Bremiller, C. Wilson, D. Dillon *et al.*, 2017 Gonadal soma controls ovarian  
21 follicle proliferation through *Gsdf* in zebrafish. *Dev Dyn* 246: 925-945.
- 22 Yano, A., R. Guyomard, B. Nicol, E. Jouanno, E. Quillet *et al.*, 2012 An immune-related gene evolved into  
23 the master sex-determining gene in rainbow trout, *Oncorhynchus mykiss*. *Curr Biol* 22: 1423-1428.

- 24 Yao, H. H., W. Whoriskey and B. Capel, 2002 Desert Hedgehog/Patched 1 signaling specifies fetal Leydig  
25 cell fate in testis organogenesis. *Genes Dev* 16: 1433-1440.
- 26 Yazawa, T., M. Uesaka, Y. Inaoka, T. Mizutani, T. Sekiguchi *et al.*, 2008 Cyp11b1 is induced in the murine  
27 gonad by luteinizing hormone/human chorionic gonadotropin and involved in the production of 11-  
28 ketotestosterone, a major fish androgen: conservation and evolution of the androgen metabolic  
29 pathway. *Endocrinology* 149: 1786-1792.
- 30 Yin, Y., H. Tang, Y. Liu, Y. Chen, G. Li *et al.*, 2017 Targeted Disruption of Aromatase Reveals Dual  
31 Functions of cyp19a1a During Sex Differentiation in Zebrafish. *Endocrinology* 158: 3030-3041.
- 32 Yoon, C., K. Kawakami and N. Hopkins, 1997 Zebrafish vasa homologue RNA is localized to the cleavage  
33 planes of 2- and 4-cell-stage embryos and is expressed in the primordial germ cells. *Development*  
34 124: 3157-3165.
- 35 Zec, I., D. Tisljaric-Medenjak, Z. B. Megla and I. Kucak, 2011 Anti-Mullerian hormone: a unique biochemical  
36 marker of gonadal development and fertility in humans. *Biochem Med (Zagreb)* 21: 219-230.
- 37 Zhang, X., G. Guan, M. Li, F. Zhu, Q. Liu *et al.*, 2016 Autosomal gsdf acts as a male sex initiator in the fish  
38 medaka. *Sci Rep* 6: 19738.
- 39 Zhang, Y. B., T. K. Liu, J. Jiang, J. Shi, Y. Liu *et al.*, 2013 Identification of a novel Gig2 gene family specific  
40 to non-amniote vertebrates. *PLoS One* 8: e60588.
- 41 Zheng, Z., H. Zheng and W. Yan, 2007 Fank1 is a testis-specific gene encoding a nuclear protein  
42 exclusively expressed during the transition from the meiotic to the haploid phase of  
43 spermatogenesis. *Gene Expr Patterns* 7: 777-783.

# Fig.1

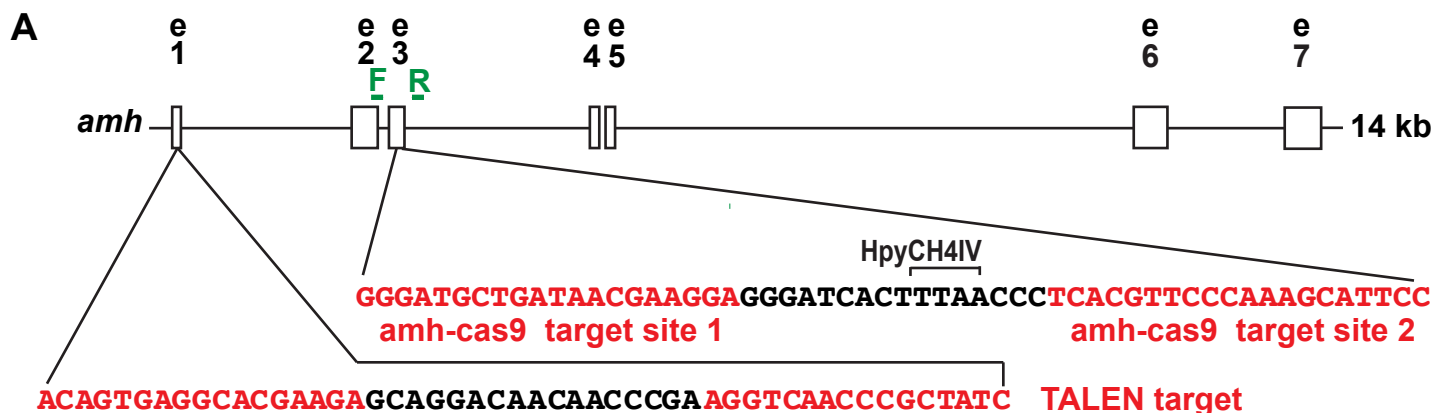

**B** *amh* PCR products from 4 embryos injected with Cas9 RNA, digested with HpyCH4IV

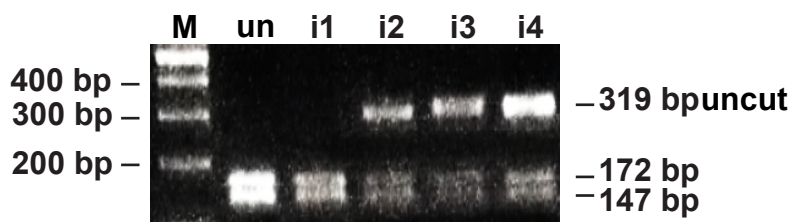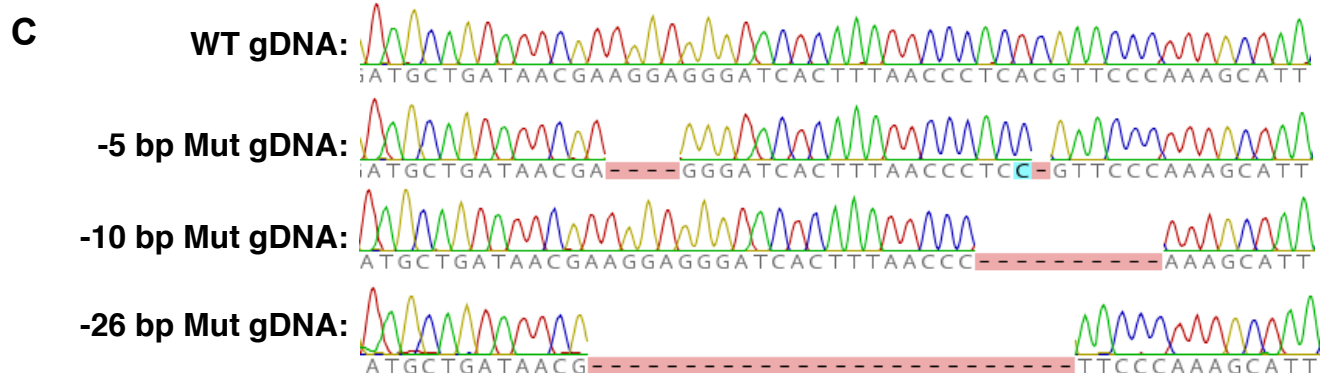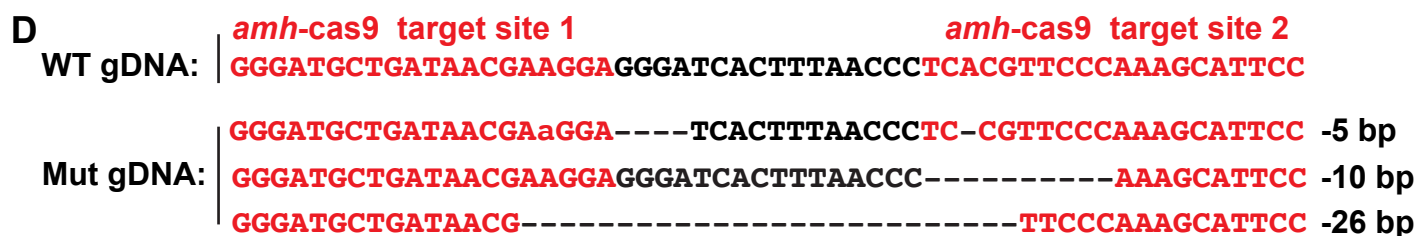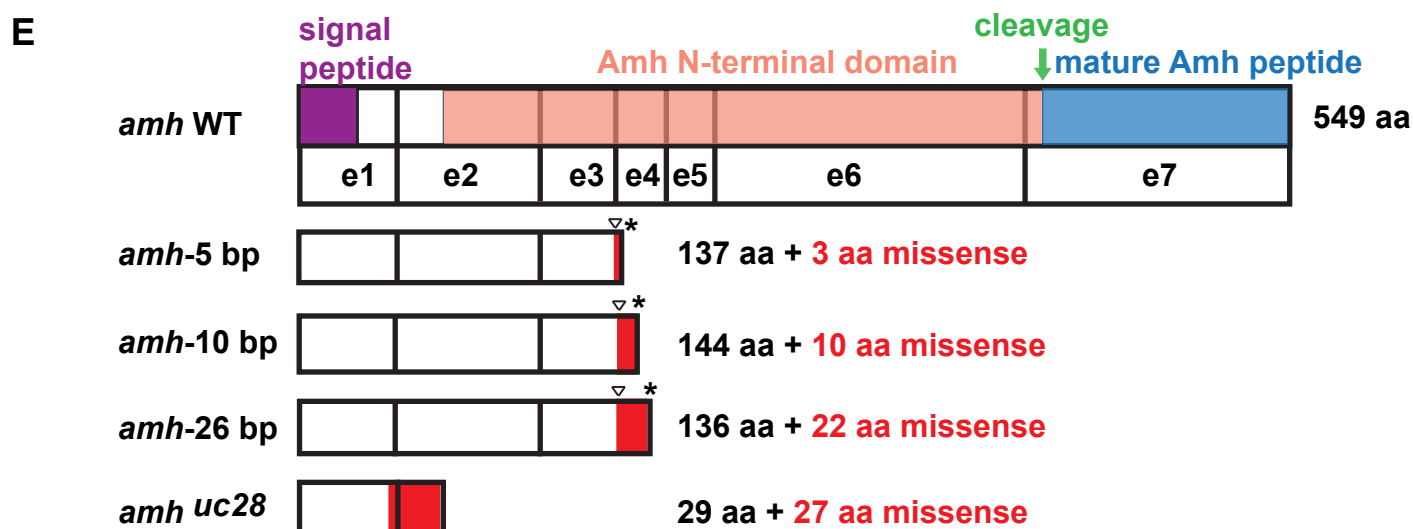

Fig. 2

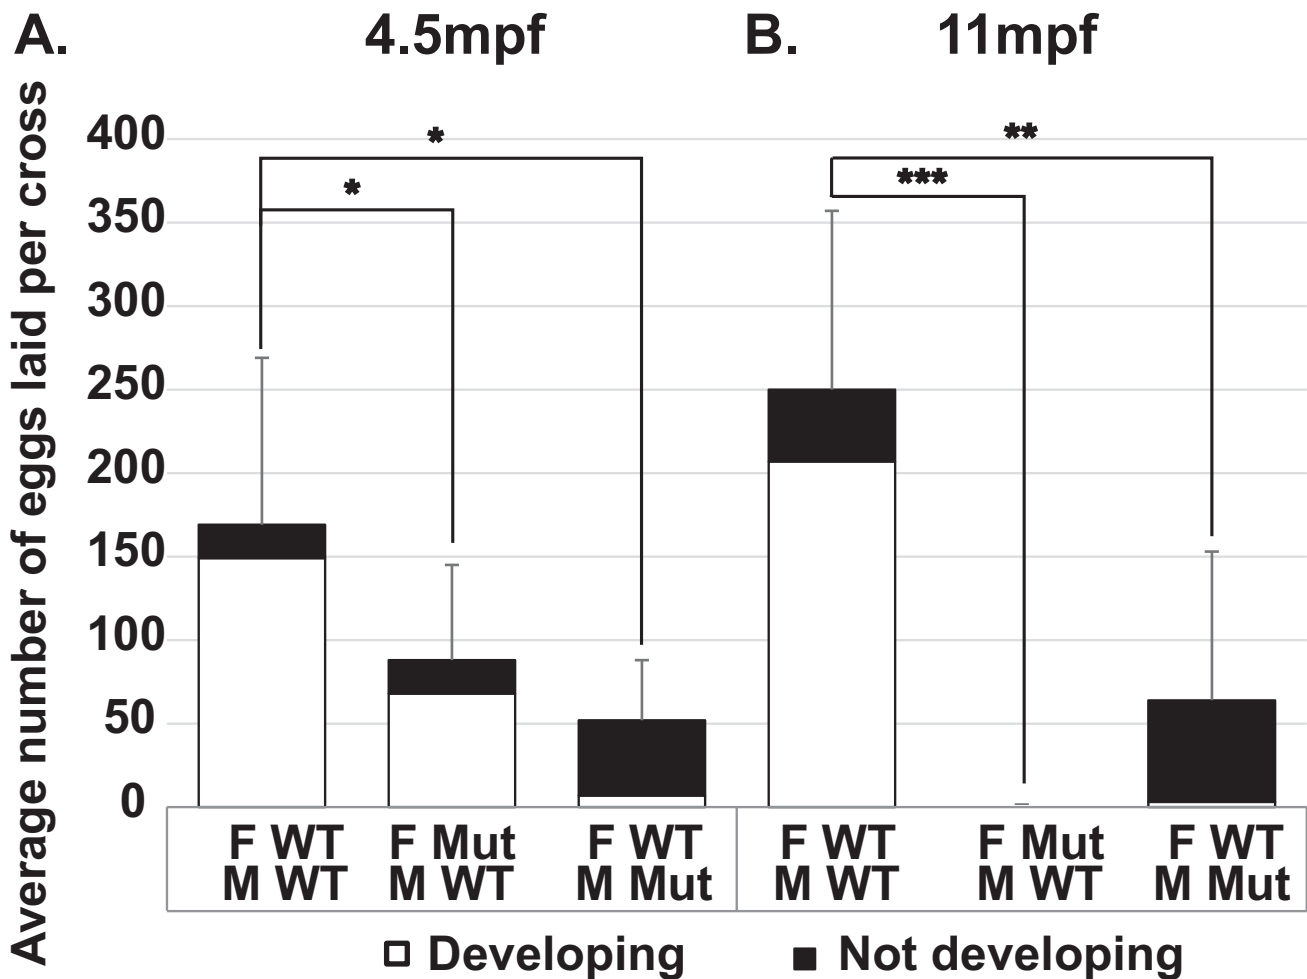

Fig. 3

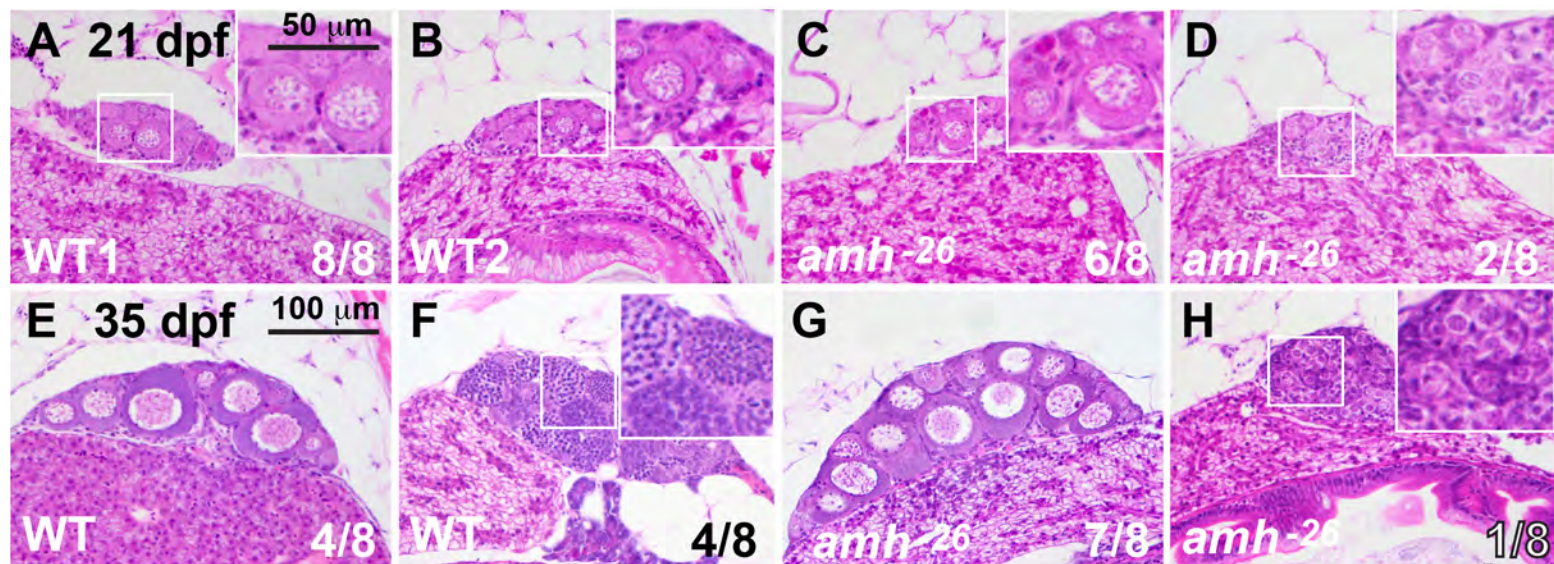

Fig. 4

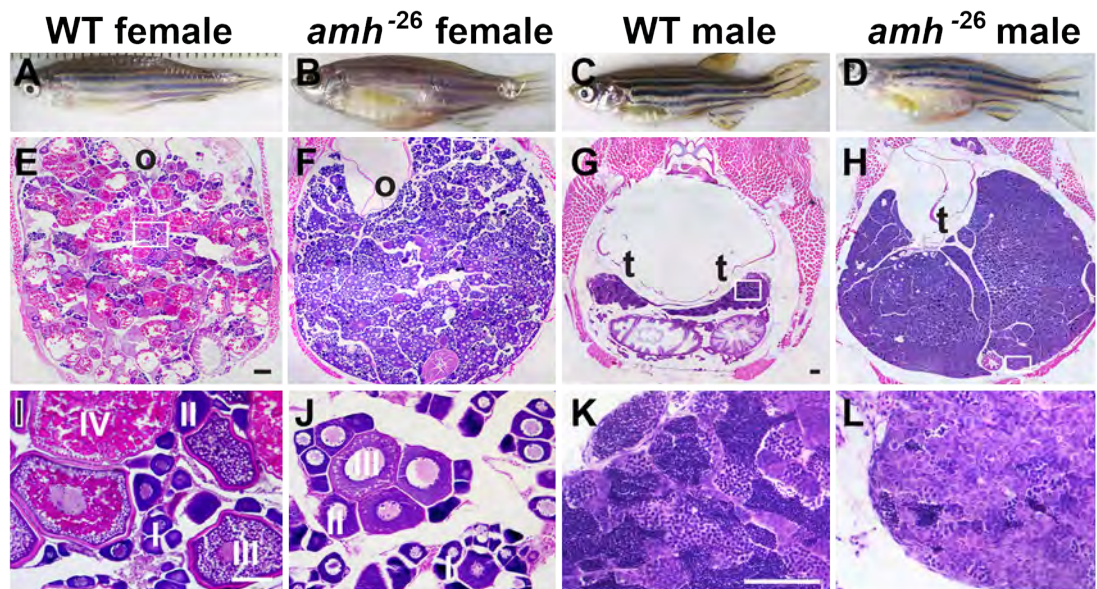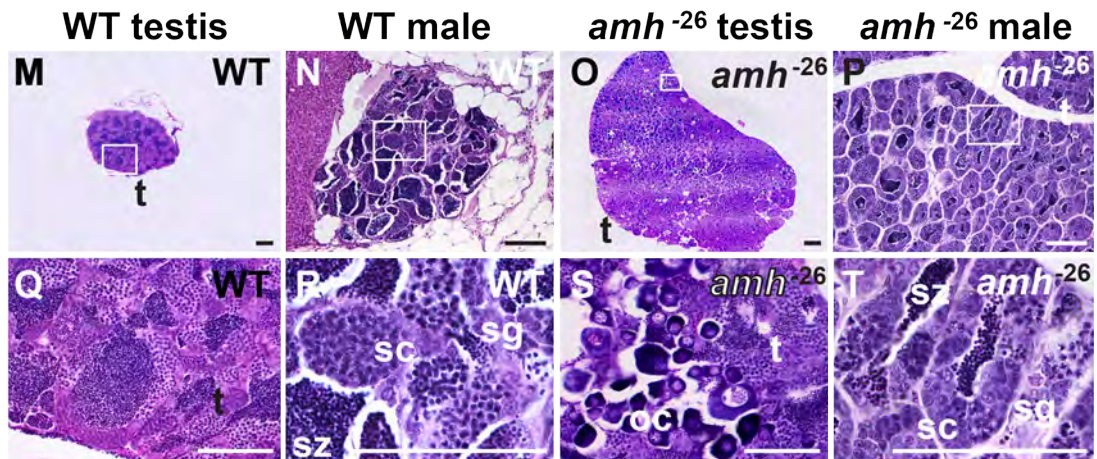

**GSI adult females**

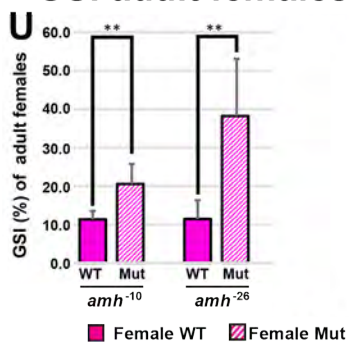

**GSI adult males**

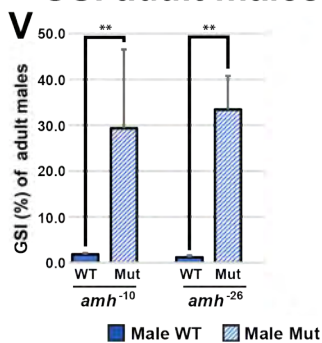

**Oocyte stages**

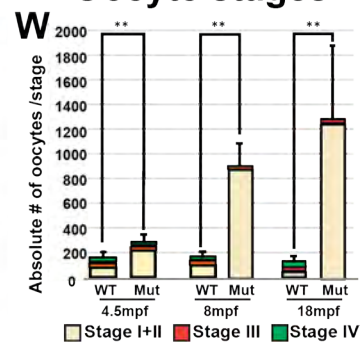

Fig.5

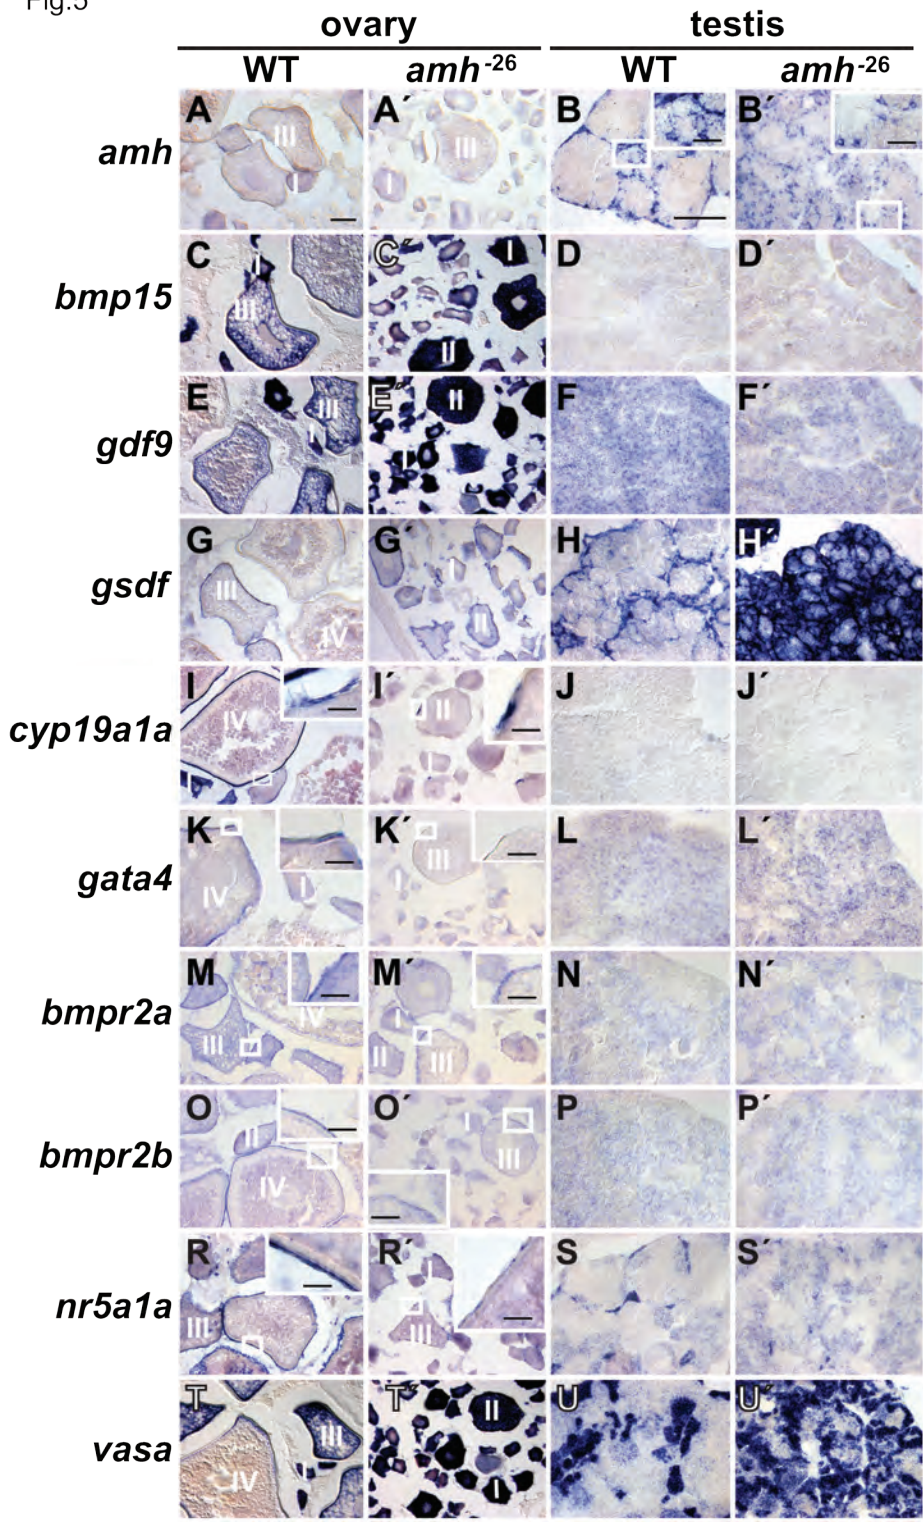



**Fig. 6**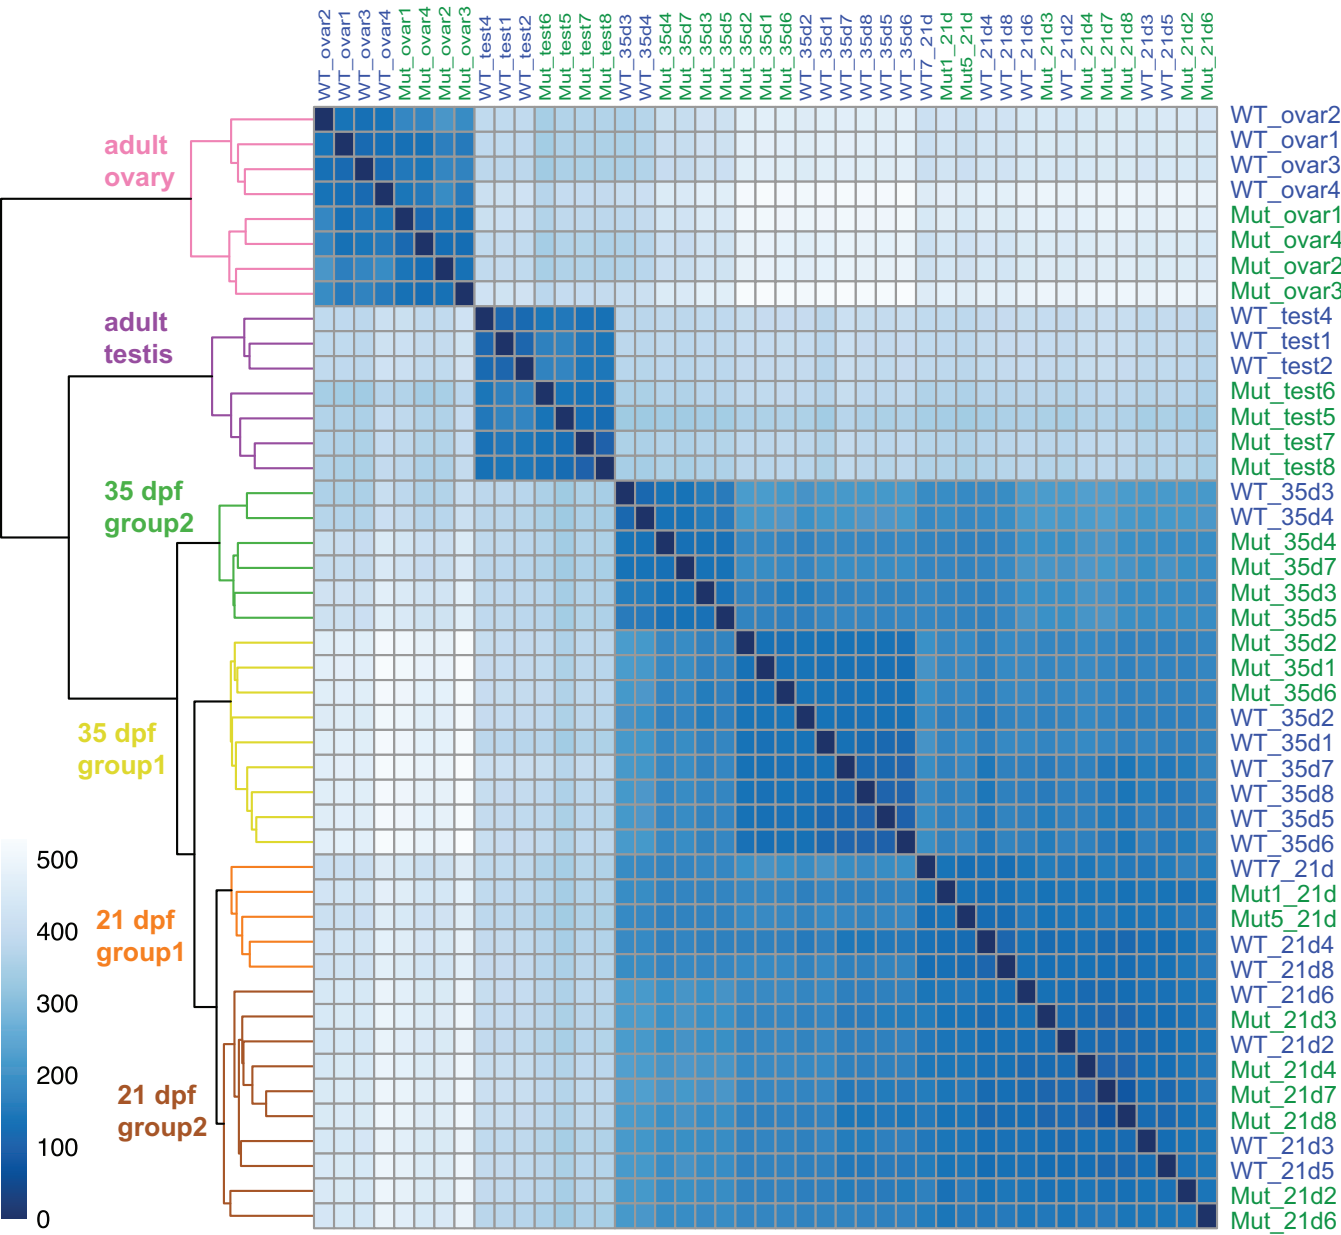

**Fig. 7**

certified by peer review) is the author/funder. All rights reserved. No reuse allowed without permission.

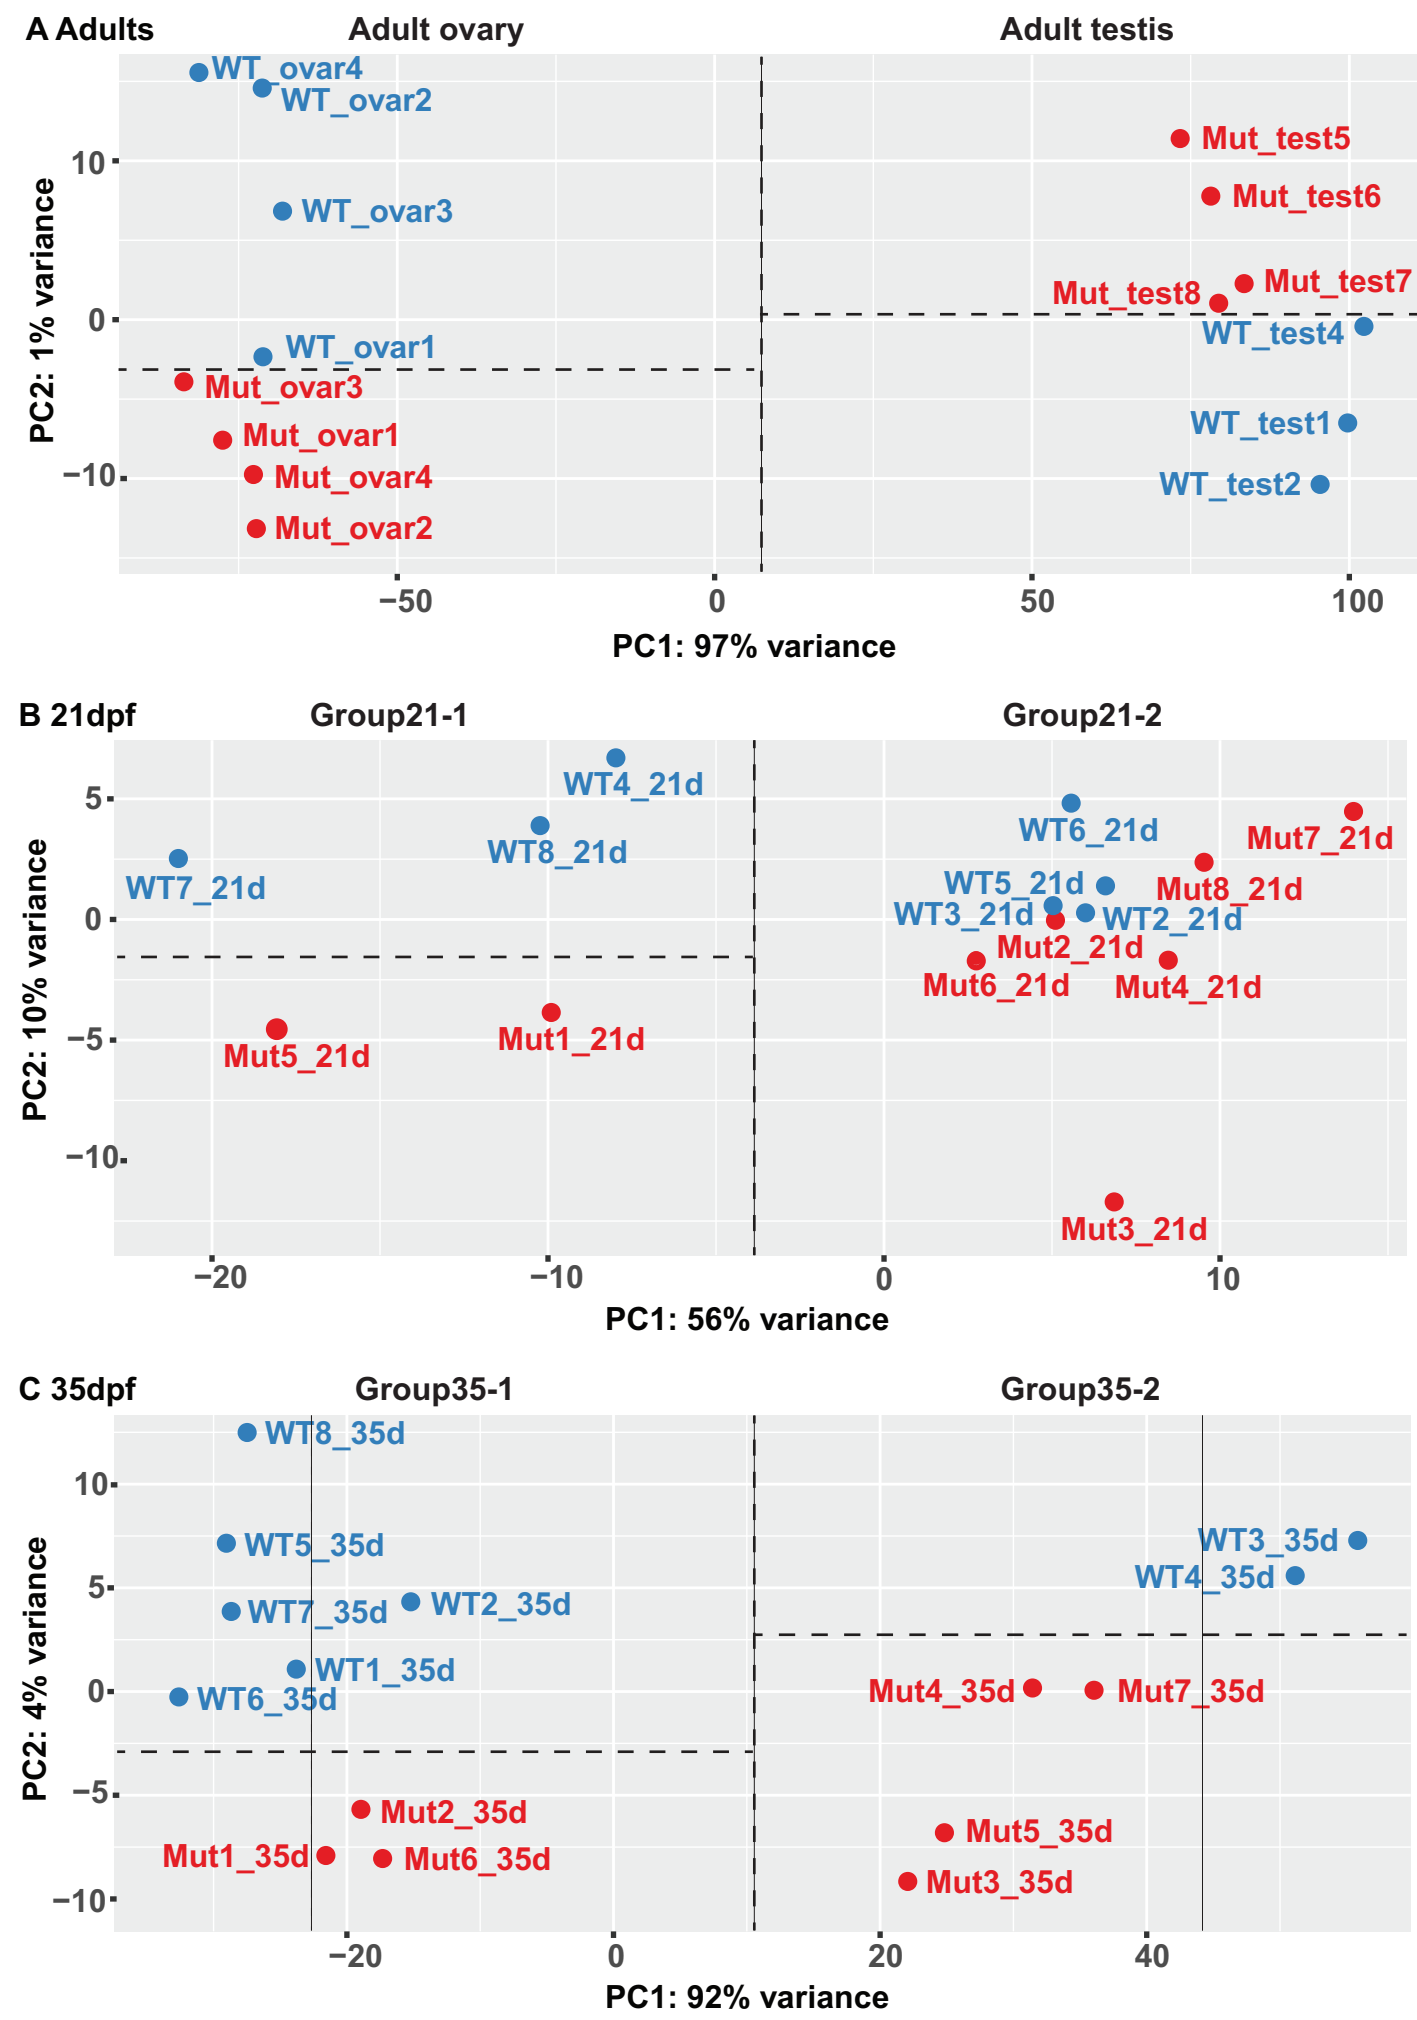

Fig. S1

ovary

testis

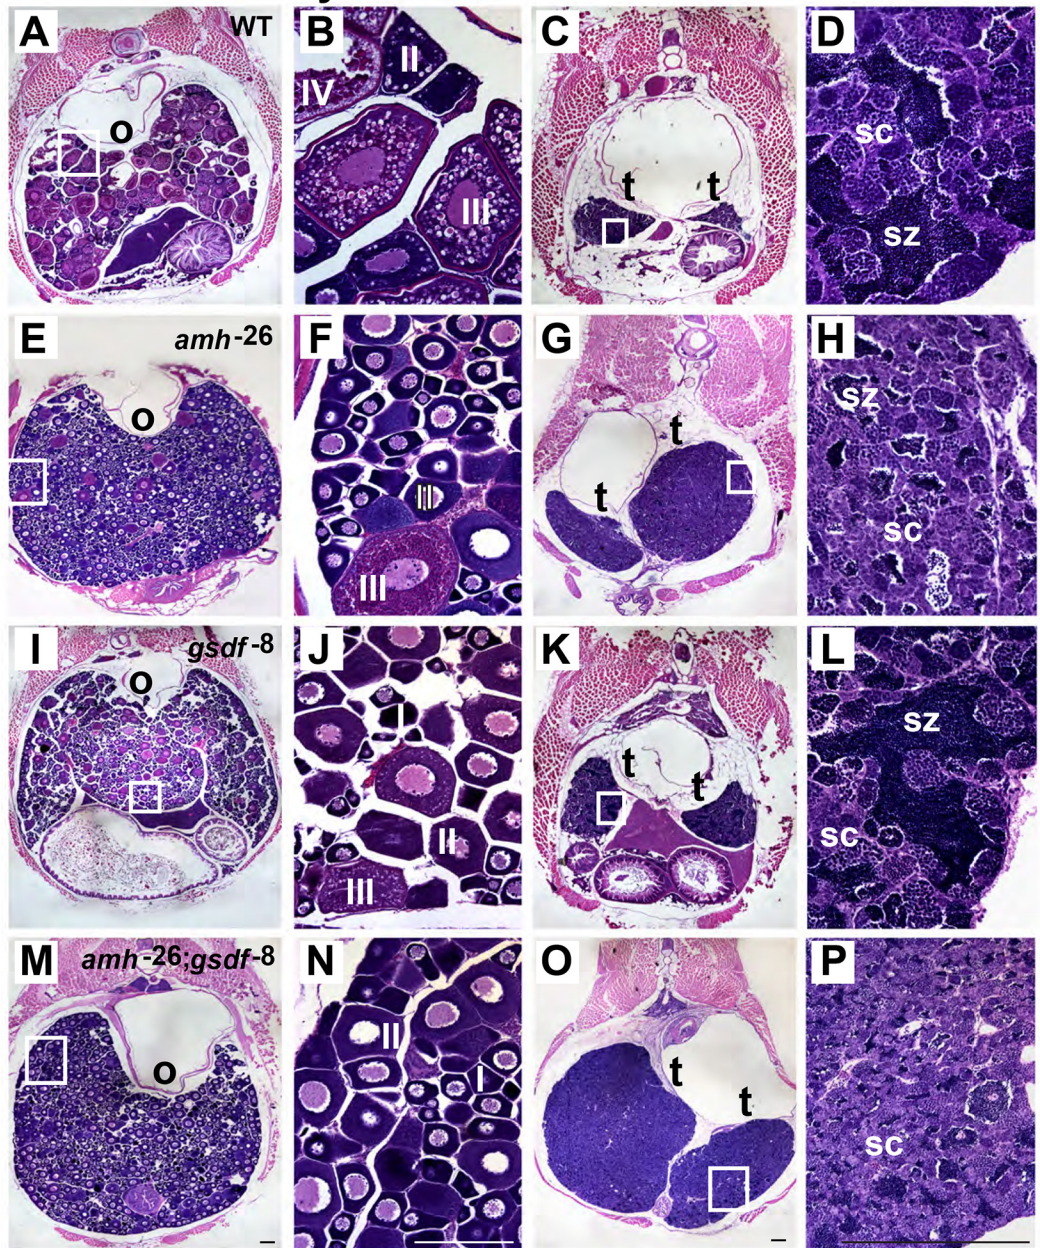

Supplemental Figure S1. Mutant phenotypes for *amh*/*gsdf* double mutants. Cross-sections of gonads from one-year old adults. (A-D) Wild type (WT); (E-H) *amh-26* mutants; (I-L) *gsdf-8* mutants; (M-P) *amh-26*/*gsdf-8* double mutants. (A, E, I, M) Ovary at low magnification. (B, F, J, N) High magnification of the boxed regions in A, E, I, M. (C, G, K, O) Testis at low magnification. (D, H, L, P) High magnification of the boxed regions in C, G, K, O. Abbreviations: I, II, III, IV: ovarian follicle stages 1 to 4; o, ovary; sc, spermatocytes; sz, spermatozoa; t, testis. Black scale bar in M for A, E, I and M; white scale bar in N for B, F, J and N; black scale bar in O for C, G, K and O; black scale bar in P for D, H, L and L. All scale bars: 100 $\mu$ m.

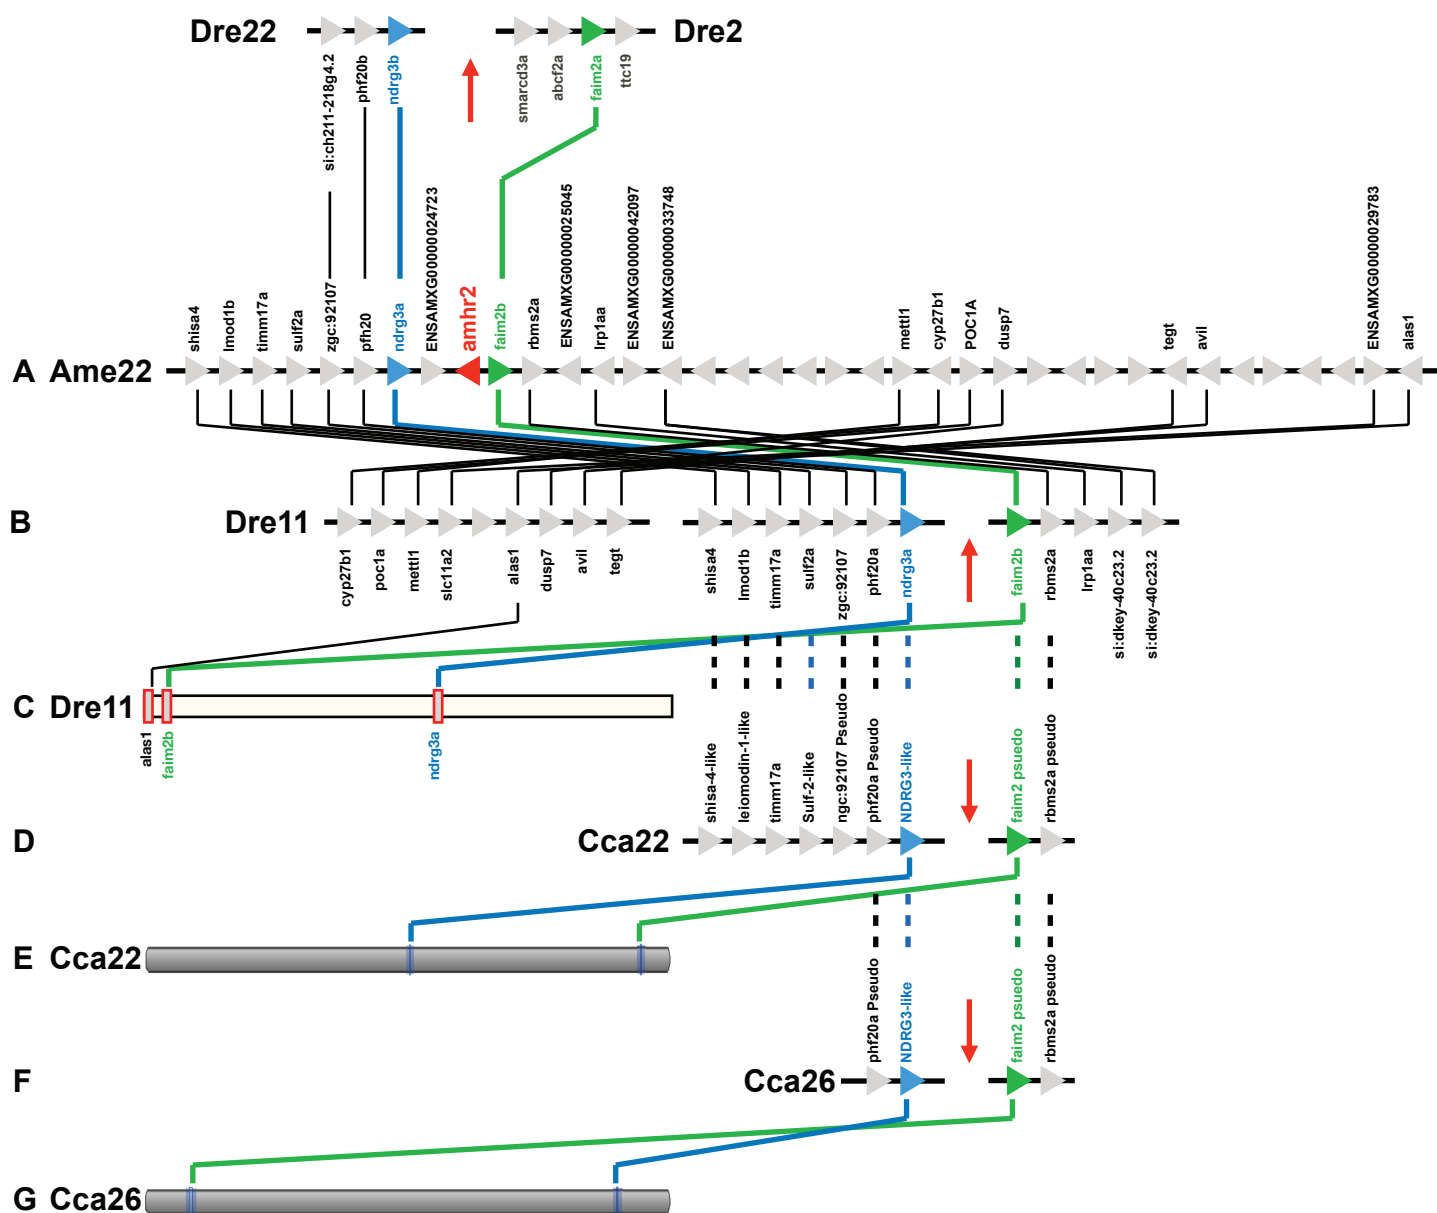

Supplemental Figure S2. Conserved syntenies and loss of the zebrafish *amhr2* gene. A. A portion of chromosome 22 (Ame22) from the cavefish *Astyanax mexicanum* containing *amhr2*. B. Three portions of zebrafish chromosome 11 (Dre11) containing regions with conserved synteny to the *amhr2*-containing portion of the cavefish genome showing that the breakpoint of a chromosome rearrangement lies at the predicted location of *amhr2*. The portion of the figure above part A shows that paralogons of the zebrafish genome from Dre22 and Dre2 contain ohnologs derived from the teleost genome duplication and also lack *amhr2*. C. The three regions of the zebrafish genome shown in in part B occupy different positions along the entire chromosome Dre11. D. Portions of the common carp (*Cyprinus carpio*) genome on two parts of Cca22 with orthology to the *amhr2*-containing part of cavefish, which are broken at the expected site of the *amhr2* gene as in zebrafish. E. Positions of regions shown in part D on chromosome Cca22. F. The duplicated region from the carp genome duplication event co-orthologous to zebrafish chromosome Dre11. G. Positions of regions shown in part F on chromosome Cca22. Results show that *amhr2* loss occurred associated with a chromosome rearrangement breakpoint that is a shared feature of cypriniforms that occurred after cypriniform otophysans diverged from characiform and siluriform otophysans.

Fig. S3

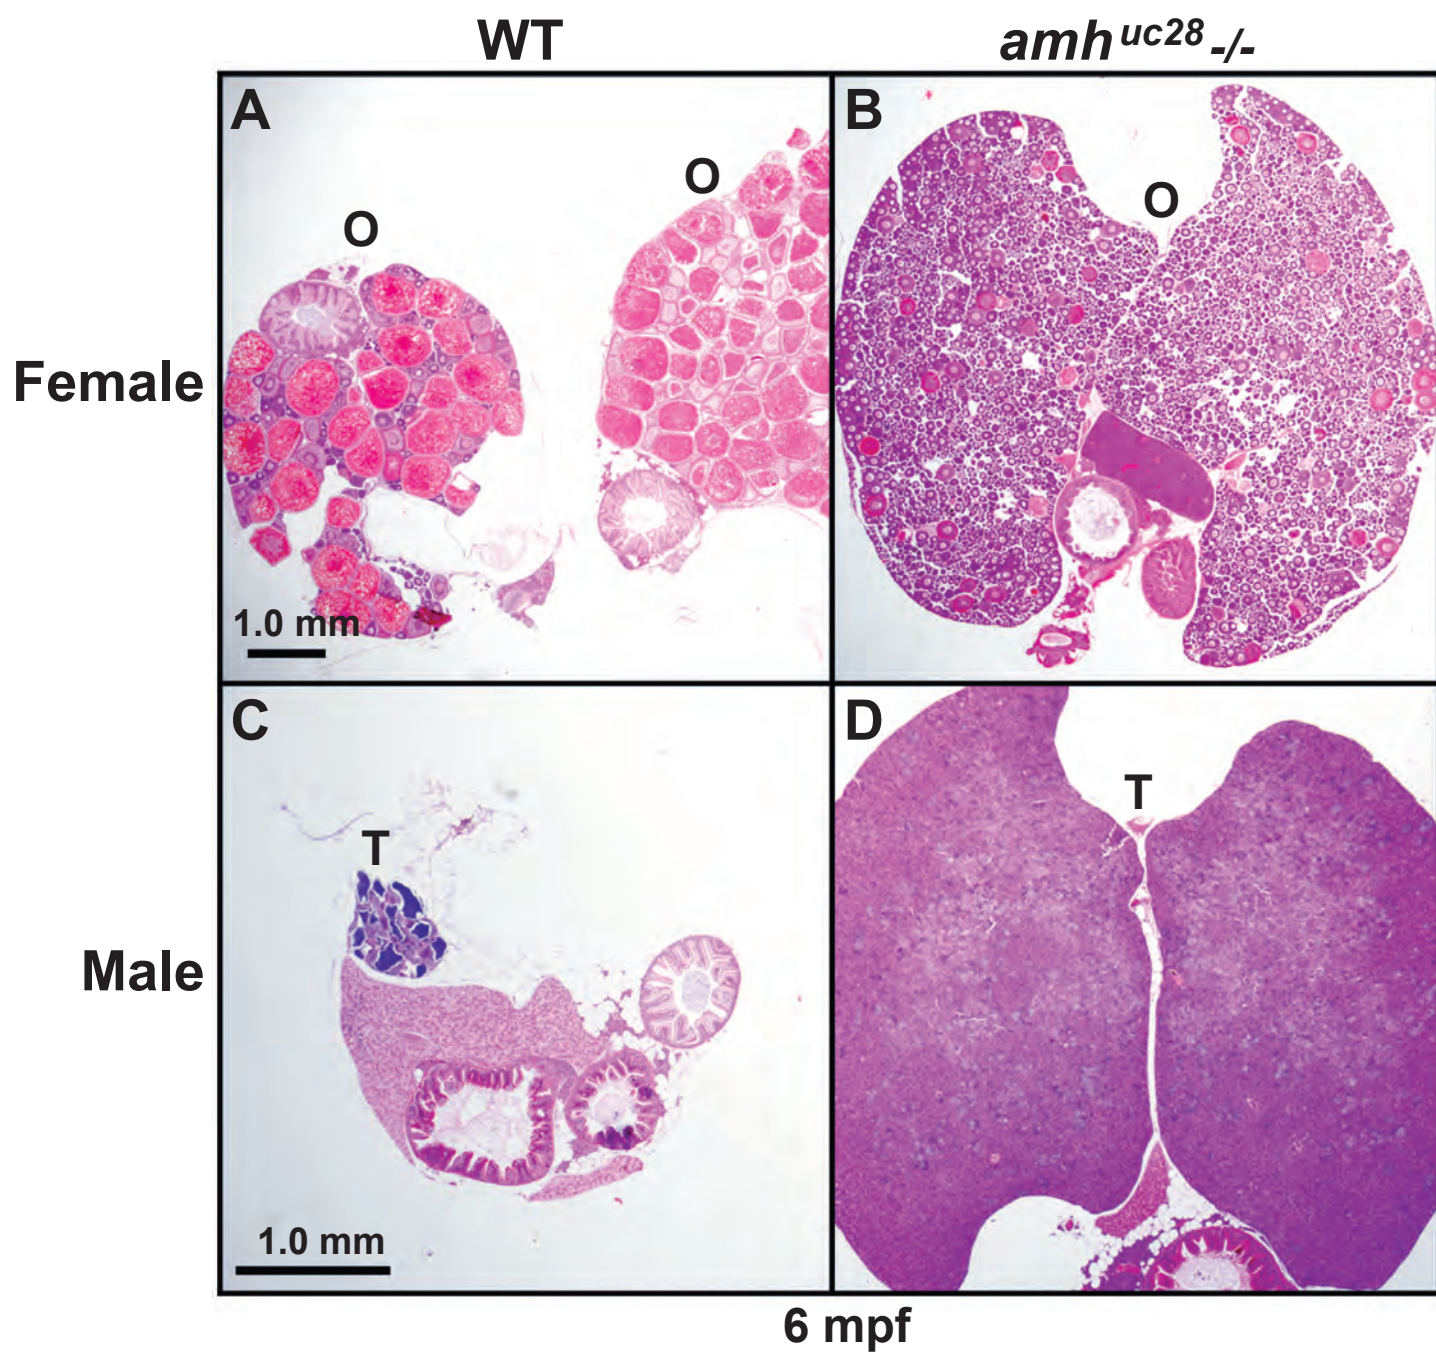

Supplemental Figure S3. Gonadal phenotypes of the *amh<sup>uc28</sup>* allele visualized in hematoxylin and eosin stained histological sections of 6mpf animals. A. Wild-type (WT) female. B. *amh<sup>uc28</sup>* mutant female. C. Wild-type male. D. *amh<sup>uc28</sup>* mutant male. Abbreviations: O, ovary; T, testis. Scale bar: 1mm.
